# Supplementary material for: Identifying landscape hot and cold spots of soil GHG fluxes by combining field measurements and remote sensing data
Source: Copernicus journal article supplement (doi:10.5194/bg-2023-99), 2023-06-20
Supplement: Supplementary file [file bg-2023-99-CC1-supplement.pdf]

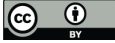

1 **Identifying landscape hot and cold spots of soil GHG fluxes by**  
2 **combining field measurements and remote sensing data**

3 **Authors:** Elizabeth Gachibu Wangari<sup>1</sup>, Ricky Mwangada Mwanake<sup>1</sup>, Tobias Houska<sup>2</sup>, David  
4 Kraus<sup>1</sup>, Gretchen Maria Gettel<sup>3,4</sup>, Ralf Kiese<sup>1</sup>, Lutz Breuer<sup>2,5</sup>, Klaus Butterbach-Bahl<sup>1,6</sup>

5 <sup>1</sup>Karlsruhe Institute of Technology, Institute for Meteorology and Climate Research, Atmospheric Environmental  
6 Research (IMK-IFU), Kreuzackbahnstrasse 19, Garmisch-Partenkirchen 82467, Germany

7 <sup>2</sup>Institute for Landscape Ecology and Resources Management (ILR), Research Centre for BioSystems, Land Use and  
8 Nutrition (iFZ), Justus Liebig University Gießen, 35392 Gießen, Germany

9 <sup>3</sup>IHE Delft Institute for Water Education, Westvest 7, 2611 AX Delft, The Netherlands.

10 <sup>4</sup>Department of Ecoscience, Lake Ecology, University of Aarhus, Aarhus Denmark

11 <sup>5</sup>Centre for International Development and Environmental Research (ZEU), Justus Liebig University Giessen,  
12 Senckenbergstrasse 3, 35390 Giessen, Germany

13 <sup>6</sup>Pioneer Center Land-CRAFT, Department of Agroecology, University of Aarhus, C. F. Møllers Allé 4, Building  
14 1120, Aarhus 8000, Denmark

15 *Correspondence to:* Klaus Butterbach-Bahl (klaus.butterbach-bahl@agro.au.dk)

16 **Keywords:** Soil respiration, Ecosystem respiration, Methane uptake, Nitrous oxide fluxes, Random forest  
17 algorithm, upscaling, Arable, Grassland, Forest

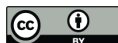

## 18 Abstract

19 Upscaling chamber measurements of soil greenhouse gas (GHG) fluxes from points to landscape scales  
20 remain challenging due to high variability of fluxes in space and time. This study measured GHG fluxes and soil  
21 parameters at selected point locations (n=268), thereby implementing a stratified sampling approach on a mixed  
22 land-use landscape (~5.8 km<sup>2</sup>). Based on these field-based measurements and remotely-sensed data on landscape and  
23 vegetation properties, we used Random Forest models to predict GHG fluxes at a landscape scale (1 m resolution) in  
24 summer and autumn. The results showed improved GHG flux prediction performance when combining field-  
25 measured soil parameters with remotely-sensed data. Available satellite data products from Sentinel-2 on vegetation  
26 cover and water content played a more significant role than attributes derived from a digital elevation model,  
27 possibly due to their ability to capture both spatial and seasonal changes of ecosystem parameters within the  
28 landscape. Similar seasonal patterns of higher soil/ecosystem respiration (SR/ER-CO<sub>2</sub>) and nitrous oxide (N<sub>2</sub>O)  
29 fluxes in summer and higher methane (CH<sub>4</sub>) uptake in autumn were observed in both the measured and predicted  
30 landscape fluxes. Based on the upscaled fluxes, we also assessed the contribution of hot spots to total landscape  
31 fluxes. The identified emission hot spots occupied a small landscape area (7 to 16%) but accounted for up to 42% of  
32 the landscape GHG fluxes. Our study showed that combining remotely-sensed data with chamber measurements and  
33 soil properties is a promising approach for identifying spatial patterns and hot spots of GHG fluxes across  
34 heterogeneous landscapes. Such information may be used to inform targeted mitigation strategies at landscape-scale.



## 35 1. Introduction

36 Atmospheric concentrations of greenhouse gases (GHGs) such as carbon dioxide (CO<sub>2</sub>), methane (CH<sub>4</sub>), and  
37 nitrous oxide (N<sub>2</sub>O) have increased since the 1750s, substantially driving global climate change (IPCC, 2019). Soils  
38 are key contributors to these GHG fluxes, with recent global emissions of approximately 350 Pg CO<sub>2</sub> equivalents per  
39 year (Oertel et al., 2016). Soil GHG emissions have accelerated due to human activities such as land use change for  
40 agricultural land expansion (Dhakal et al., 2022). Globally, agricultural soils are significant sources accounting for  
41 about 37% of the GHG emissions within the agricultural sector (Tubiello et al., 2013). However, the estimates of soil  
42 GHG fluxes are highly uncertain since soil properties, land use, and land management, which are key indirect drivers  
43 of the emissions, largely differ across landscapes and regions. For instance, global annual estimates range widely  
44 from 67 to 101 Pg C (Jian et al., 2018) for soil respiration, 2.5 – 6.5 Tg N<sub>2</sub>O-N for annual soil N<sub>2</sub>O emissions (Tian  
45 et al., 2020), and 12 – 60 Tg for soil CH<sub>4</sub> uptake rates (Dutaur & Verchot, 2007). These uncertainties make it  
46 difficult to accurately quantify the GHG source or sink strengths of soils and to develop targeted mitigation options  
47 across scales.

48 Current upscaling approaches from localized measurements of soil GHG fluxes to landscape or regional  
49 scales using chamber or site-specific micro-meteorological methods such as eddy-covariance (e.g., Sundqvist et al.,  
50 2015; Vainio et al., 2021; Warner et al., 2018; Han et al., 2022), fail to capture the spatio-temporal variation of hot-  
51 or cold-spots, resulting in uncertainties in regional and global GHG estimates (Hagedorn & Bellamy, 2011; Levy et  
52 al., 2022). Contrary to the eddy-covariance method, chamber-based approaches can be used to capture fine-scale  
53 spatial variabilities of soil GHG fluxes within landscapes, e.g., when measurements are conducted at sampling sites  
54 representative of the spatial heterogeneities related to land use, land management, and topography (e.g., Warner et  
55 al., 2018; Vainio et al., 2021; Wangari et al., 2022). However, the ability of chambers to accurately quantify  
56 landscape fluxes over relatively larger areas is limited and closely related to the number of chamber measurement  
57 locations per unit area (Wangari et al., 2022). Previous studies have shown that the uncertainties in landscape-scale  
58 fluxes from chamber measurements using area-weighted averages increase exponentially with a decrease in the  
59 number of chamber measurement locations (e.g., Arias-Navarro et al., 2017; Wangari et al., 2022). Nevertheless, the  
60 [practicability](#) of increasing the number of chamber measurement locations to quantify landscape fluxes is constrained  
61 by extensive human and technical resource requirements, hence there is a need for alternative ways of estimating  
62 GHG landscape fluxes.

63 The limitation of extensive chamber measurements required to quantify landscape fluxes can be overcome  
64 through modeling approaches that offer cost-effective and more practical alternatives. Machine learning (ML)  
65 algorithms are increasingly used to gap-fill spatio-temporal datasets on soil GHG fluxes as they require lesser  
66 computational time and expertise than complex biophysical models (Dorich et al., 2020; Zhang et al., 2020; Saha et  
67 al., 2021; Adjuik & Davis, 2022; Joshi et al., 2022). Amongst the available ML algorithms, the random forest (RF)  
68 algorithm has been evaluated as one of the best for predicting soil GHG fluxes (Hamrani et al., 2020; Adjuik &

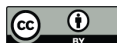

69 Davis, 2021; Han et al., 2022). The RF algorithm has been widely applied to gap-fill and upscale soil GHG fluxes in  
70 temperate ecosystems from point measurements to larger scales, with relatively better prediction accuracies (e.g.,  
71 Philibert et al., 2013; Räsänen et al., 2021; Vainio et al., 2021).

72 Several studies have explored the use of high-resolution remote-sensing (RS) datasets such as digital  
73 elevation models (DEMs) and indices from spectral characteristics derived from satellite images in combination with  
74 on-site chamber measurements to predict landscape GHG fluxes (e.g., Sundqvist et al., 2015; Warner et al., 2018;  
75 Vainio et al., 2021; Räsänen et al., 2021). These studies used RS datasets on landscape and vegetation parameters as  
76 proxies for soil physical and chemical characteristics such as soil moisture, soil vegetation cover, and nutrient  
77 availability, i.e., key biogeochemical drivers of soil GHG fluxes. However, the above studies have either been  
78 conducted over relatively small areas or have focused on individual land uses and GHG fluxes. For instance, only  
79 one study has applied a RF approach to predict CH<sub>4</sub> fluxes for a larger (12.4 km<sup>2</sup>) peatland-forested landscape based  
80 on RS data and 279 on-site measurements of soil temperature, moisture, and vegetation (Räsänen et al., 2021). In  
81 addition, spatial CO<sub>2</sub> and CH<sub>4</sub> fluxes have been predicted for relatively small (~0.1 km<sup>2</sup>) forested landscapes using  
82 DEM-derived terrain attributes and a few site-measured (temperature and moisture) soil variables (Warner et al.,  
83 2018; Vainio et al., 2021). Applying RF models using various RS datasets and soil parameters for soil GHG flux  
84 predictions on larger and heterogeneous landscapes in relation to land use, topography, and soil conditions remains  
85 unexplored. It is still uncertain whether such landscape flux predictions would improve if supplemented by multiple  
86 actual field measurements of soil properties (e.g., texture) and variables (e.g., inorganic N content), which may better  
87 describe the geochemical and physical conditions compared to RS-derived indices.

88 In this study, we aimed to determine the potential of applying the RF algorithm to predict the spatial and  
89 seasonal variability of soil CO<sub>2</sub>, CH<sub>4</sub>, and N<sub>2</sub>O fluxes using a high number of stratified sampling locations (n = 268)  
90 spread across a relatively large (~5.8 km<sup>2</sup>) landscape with heterogeneous land uses (forest, grassland, and arable  
91 land). Specifically, we aimed to: (a) evaluate the effectiveness of high-resolution RS data and relatively low-  
92 resolution data on soil physico-chemical parameters in predicting soil GHG fluxes across different land uses; (b)  
93 predict high-resolution soil GHG fluxes at a landscape scale and detect GHG hot spots and cold spots; and (c)  
94 compare landscape GHG fluxes upscaled from RF-predicted high-resolution maps with aggregated landscape flux  
95 estimates from averaged (point) fluxes multiplied by landscape area. We hypothesized improved prediction  
96 accuracies using a combination of RS datasets that act as proxies of key drivers of soil GHG fluxes (e.g., vegetation  
97 cover and water content) and the site-measured soil parameters representing the actual field conditions. We expected  
98 fine-scale hot spots (within a few meters) to occur in cultivated areas and cold spots in forested areas. We also  
99 hypothesized that the high-resolution upscaled fluxes from the RF approach, which better captures hot and cold spot  
100 regions across the landscape, would avoid possible under- or overestimations of landscape fluxes derived from land  
101 use specific area-weighted averages calculated from few point chamber measurement locations.



102 **2. Materials and methods**

103 **2.1 Study area**

104 The study area is located within the Schwingbach catchment in Hesse, central Germany (50°30'4.23. N,  
105 8°33'2.82. E). The landscape covers an area of approximately 5.8 km<sup>2</sup> excluding the human settlement areas and  
106 road networks. Land uses within the landscape are mainly forests (57%) and arable lands (34%). Grasslands cover  
107 about 8% and are primarily located in riparian zones (Figure 1). The dominant soil types are cambisol (69%, forest  
108 and arable), stagnosol (23%, mainly arable), and gleysol (5%) which are found along grassland riparian zones  
109 (Wangari et al., 2022). The topsoils (0 – 5 cm) in the arable and grasslands have a silt loam texture, while the  
110 topsoils in the forest land mostly have a sandy loam texture (Sahraei et al., 2020). The landscape has an average  
111 slope of 5% with an elevation range of 233 – 415 m a.s.l. The region has a temperate oceanic climate (Cfb, Köppen  
112 climate classification) with annual average precipitation and temperature of 623 mm and 9.6°C based on long-term  
113 data (1969 – 2019) (Sahraei et al., 2021).

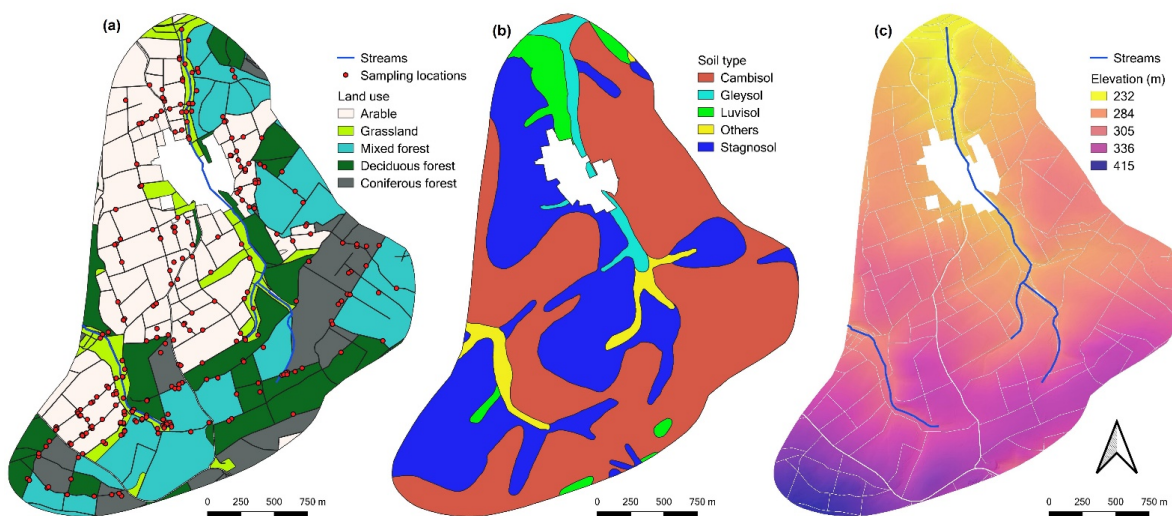

114

115 **Figure 1:** Map showing (a) the land uses and the location of the stratified sampling sites (selected based on combined classes of  
116 land use, slope, and soil type) across the study area; (b) the soil types; and (c) the digital elevation model (DEM; 1 m resolution) of  
117 the landscape (source of DEM: Hessische Verwaltung für Bodenmanagement und Geoinformation, <https://hvbg.hessen.de/>).



118 **2.2 Soil physico-chemical parameters and GHG fluxes**

119 **2.2.1 Point measurements**

120 Soil sampling and GHG flux measurements (CH<sub>4</sub>, N<sub>2</sub>O, and CO<sub>2</sub>) were conducted at spatially distributed  
121 sampling sites across the study landscape (see Tab. 1 for a list of observed variables). We used a stratified random  
122 sampling approach to distribute 270 sites across different land uses (forest, grassland, and arable), soil types  
123 (cambisol, stagnosol/gleysol, and luvisol), and slopes (0–5, 6–11, and >11%) to capture the spatial variability of soil  
124 GHG fluxes and the driving parameters (Wangari et al., 2022). Out of the 270 targeted locations, field measurements  
125 were conducted at 246 sites in the summer (30<sup>th</sup> June – 9<sup>th</sup> July, field measuring campaign 1) and 268 sites in the  
126 autumn (8<sup>th</sup> – 17<sup>th</sup> September, field measuring campaign 2) of 2020. The estimated number of measured points for  
127 the forest, grassland, and arable ecosystems was ~25, 150, and 28 per km<sup>2</sup> (Table 1). We allocated more grassland  
128 sites due to the hypothesis that riparian grasslands are hot spots of GHG fluxes.

129 Soil GHG flux measurements were performed during the day (7.00 am – 5.00 pm) using a fast-box chamber  
130 technique (Hensen et al., 2013; Butterbach-Bahl et al., 2020). The CO<sub>2</sub> concentrations in the opaque chamber  
131 headspace were measured with an infrared gas analyzer (LI-840A & LI-850, LI-COR Biosciences, Lincoln, NE,  
132 USA), while CH<sub>4</sub> and N<sub>2</sub>O concentrations were measured with an Off-Axis Integrated Cavity Output Spectroscopy  
133 (OA-ICOS) analyzer (Los Gatos Research, Inc., CA, USA). The GHG fluxes were calculated based on the linear  
134 changes of gas concentrations in the chamber headspace in the first 5–7 minutes following chamber closure. The soil  
135 sampling, analysis, and flux measurement methods are detailed in Wangari et al. (2022).



136 **Table 1:** List of the soil physico-chemical parameters and remotely-sensed data used in this study to upscale the GHG fluxes and  
 137 details of the spatial resolutions of the maps.

| Category                                    | Predictor variables                                  | Resolution                     |       | Source                                                                                    |
|---------------------------------------------|------------------------------------------------------|--------------------------------|-------|-------------------------------------------------------------------------------------------|
|                                             |                                                      | Original                       | Final |                                                                                           |
| Remotely-sensed data (RS)                   | Elevation                                            | 1 m                            | 1 m   | Hessische Verwaltung für Bodenmanagement und                                              |
|                                             | Slope                                                | 1 m                            | 1 m   | Calculated from elevation                                                                 |
|                                             | Aspect                                               | 1 m                            | 1 m   |                                                                                           |
|                                             | Topographic wetness index (TWI)                      | 1 m                            | 1 m   |                                                                                           |
|                                             | Topographic position index (TPI)                     | 1 m                            | 1 m   |                                                                                           |
|                                             | Normalized difference vegetation index (NDVI)        | 10 m                           | 1 m   | Copernicus Sentinel-2 (European Space Agency)                                             |
|                                             | Green normalized difference vegetation index (GNDVI) | 10 m                           | 1 m   |                                                                                           |
| Normalized difference moisture index (NDMI) | 20 m                                                 | 1 m                            |       |                                                                                           |
| Soil physico-chemical parameters (SP)       | Soil temperature (°C)                                |                                | 1 m   | Interpolated from sampling point data measured in summer and autumn (Wangari et al. 2022) |
|                                             | Gravimetric soil moisture (%)                        |                                | 1 m   |                                                                                           |
|                                             | pH                                                   |                                | 1 m   |                                                                                           |
|                                             | Bulk density (g cm <sup>-3</sup> )                   |                                | 1 m   |                                                                                           |
|                                             | NO <sub>3</sub> -N (mg kg <sup>-1</sup> dry soil)    | ~ 25, 150, and 28 sites        | 1 m   |                                                                                           |
|                                             | NH <sub>4</sub> -N (mg kg <sup>-1</sup> dry soil)    | per km <sup>2</sup> in forest, | 1 m   |                                                                                           |
|                                             | DOC (mg kg <sup>-1</sup> dry soil)                   | grassland,                     | 1 m   |                                                                                           |
|                                             | TDN (mg kg <sup>-1</sup> dry soil)                   | and arable land                | 1 m   |                                                                                           |
|                                             | Soil TN (%)                                          |                                | 1 m   |                                                                                           |
|                                             | Soil TOC (%)                                         |                                | 1 m   |                                                                                           |
|                                             | CN                                                   |                                | 1 m   |                                                                                           |
|                                             | Sand content (%)                                     |                                | 1 m   |                                                                                           |
|                                             | Silt content (%)                                     |                                | 1 m   |                                                                                           |
| Clay content (%)                            |                                                      | 1 m                            |       |                                                                                           |

### 139 2.2.2 Spatial interpolation of soil parameters

140 Upscaling soil GHG fluxes using the RF algorithm required spatial raster maps of the soil physico-chemical  
 141 predictor parameters. Thus, we interpolated our measured point data to continuous landscape maps using the inverse  
 142 distance weighted (IDW) approach in the System for Automated Geoscientific Analyses software (SAGA: QGIS)  
 143 with a distance coefficient power of 1 (Gradka & Kwinta 2018). The spatial interpolations were performed per land  
 144 use (forest, grassland, and arable land) and for each season (summer and autumn) due to significant variations in soil  
 145 parameters such as soil moisture or inorganic N content across land uses and seasons (see Wangari et al., 2022).

### 146 2.3 Remote sensing data

147 We retrieved several landscape-scale remote-sensing images with spatial data representing potential drivers  
 148 of soil GHG fluxes, such as vegetation cover and vegetation water content. Landscape elevation was acquired from a  
 149 high-resolution (1 m) digital elevation model (DEM) retrieved from the Hessische Verwaltung für  
 150 Bodenmanagement und Geoinformation on March 1, 2022 (link source). Slope and aspect were calculated from the



151 DEM using the “r.slope.aspect” function in QGIS. We further computed the topographic position index (TPI) and  
152 topographic wetness index (TWI) from the DEM using the terrain analysis plugin in QGIS. Vegetation information  
153 on chlorophyll and water content was derived from satellite bands of Sentinel-2 images. Satellite images with low  
154 (<1%) cloud cover were accessed from the ESA Copernicus Open Access Hub (link source; accessed on March  
155 2021) using the Semi-Automatic Classification Plugin (SCP) in QGIS for each field measuring period. The  
156 normalized difference vegetation index (NDVI) and the green normalized difference vegetation index (GNDVI) were  
157 calculated using the near-infrared (NIR), red, and green bands (Bannari et al. 1995; Gitelson and Merzlyak, 1998;  
158 Eq. 1 and 2). Compared to NDVI, GNDVI has a higher ability to detect differences in the chlorophyll content of  
159 plants, especially later in the vegetation period, due to the higher chlorophyll sensitivity of the green band in GNDVI  
160 than the red band in NDVI. The vegetation water content was estimated using the normalized difference moisture  
161 index (NDMI), which was computed using the NIR and short-wave infrared (SWIR) bands (Gao, 1996; Malakhov  
162 and Tsyhuyeva, 2020; Eq. 3). We uniformly downscaled the resolutions of these remotely-sensed vegetation indices  
163 to match the 1 m spatial resolution of the DEM-derived data files (Table 1).

164 
$$NDVI = \frac{NIR-RED}{NIR+RED} \quad (\text{Eq. 1})$$

165 
$$GNDVI = \frac{NIR-GREEN}{NIR+GREEN} \quad (\text{Eq. 2})$$

166 
$$NDMI = \frac{NIR-SWIR}{NIR+SWIR} \quad (\text{Eq. 3})$$

#### 167 **2.4 Random Forest regression model**

168 RF model development and prediction of the GHG fluxes were performed per land use (forest, grassland,  
169 and arable) because there were statistically significant differences observed in the measured fluxes and the  
170 underlying GHG flux controls of soil parameters for the different land uses (Wangari et al., 2022). For instance, N<sub>2</sub>O  
171 fluxes and soil nitrate concentrations were up to two-fold higher in arable soils than in forest or grassland soils.  
172 The CH<sub>4</sub> uptake rates of grassland and arable soils were lower than those of forest soils due to general differences in  
173 soil structure, nitrogen concentrations, and disturbances (Wangari et al., 2022). We trained models using merged  
174 summer and autumn point data to enable larger and temporally representative datasets for training models that could  
175 estimate low and high landscape GHG fluxes (Figure 2).



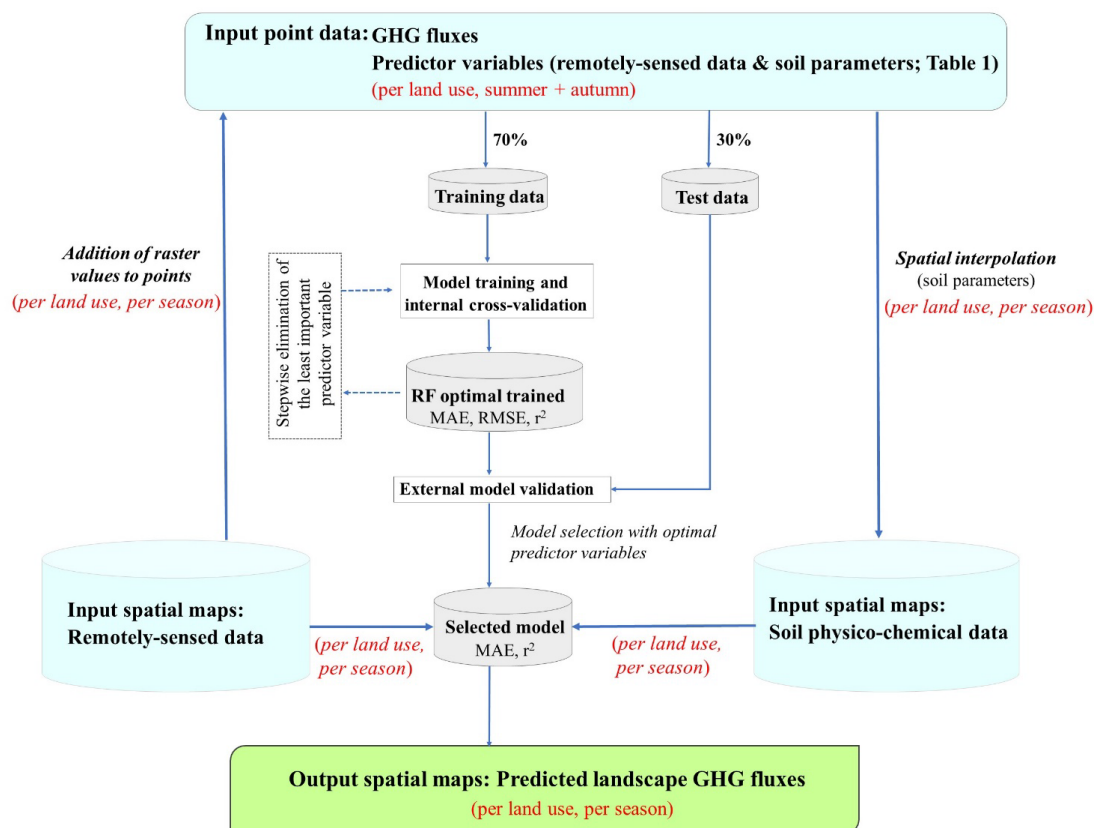

176

177 **Figure 2:** Workflow summary showing the input data (in blue), the approach used for RF model development and prediction of  
178 landscape fluxes, and the performance evaluation metrics (MAE, RMSE, and  $r^2$ ).

179 We used the RF algorithm built in the CARET (classification and regression training) package in R to  
180 predict the soil GHG fluxes at a landscape scale (Breiman, 2001; Kuhn, 2008). For model development, the input  
181 datasets were split into a training and internal cross-validation set (70%) and an external test set (30%) using a  
182 stratified random sampling method. We defined a ten-fold ( $K=10$ ) repeated cross-validation scheme using the  
183 ‘trainControl’ function to internally validate our trained models and prevent model overfitting (Berrar, 2018). A seed  
184 value of 123 was specified using the ‘set.seed’ function to enable reproducible results each time we ran a specific  
185 model. The optimal trained model was automatically selected using the mean absolute error (MAE) metric with the  
186 least value. The predictor variables in the optimal trained model were then ranked according to their importance  
187 using the RF variable importance measure in the ‘varImp’ function. Subsequently, stepwise elimination of the least  
188 essential variable was performed to quantify the predictive power of landscape GHG fluxes using fewer predictor  
189 variables (Figure 2).

190 To assess the effectiveness of various types of predictors in modeling landscape fluxes, we defined  
191 three categories of datasets, namely remote-sensing (RS), site-measured soil physico-chemical parameters (SP), and  
192 combined data (CD) (Table 1). Several RF models were trained following the stepwise elimination of the least



193 important variables in each data category (RS, SP, CD). Since 88% of CH<sub>4</sub> fluxes were negative and 86% of N<sub>2</sub>O  
194 fluxes were positive (Wangari et al., 2022), we additionally trained models using only the negative CH<sub>4</sub> and positive  
195 N<sub>2</sub>O flux datasets to compare their performances with the models built with all (positive and negative) fluxes.

## 196 **2.5 Model performance assessment and prediction of landscape fluxes**

197 The performance assessment metrics of the trained models included MAE, root mean square error (RMSE),  
198 and the coefficient of determination ( $r^2$ ) from the internal cross-validation. The final models for predicting landscape  
199 fluxes in each data category (RS, SP, CD) were selected based on the highest possible  $r^2$  with a relatively low MAE.  
200 For each season and land use, the surface maps of the respective predictor variables in the final models were merged  
201 using the raster brick function in R. The spatial fluxes for each land use were then predicted based on the selected  
202 model and the input raster brick using the ‘predict’ function in R. To improve the prediction performance, the non-  
203 normal distributed (SR/ER\_CO<sub>2</sub> and N<sub>2</sub>O) fluxes were log-transformed before model development. After prediction,  
204 the transformed fluxes were retransformed using an exponential function.

205 Further evaluation of the model performances was conducted through linear regression and correlation  
206 analysis of observed against retransformed predicted fluxes for all sampling sites. An additional external validation  
207 step was performed using the measured and predicted fluxes of the sampling sites in the 30% test dataset that was  
208 excluded from the model development. For this analysis, we compared the predicted mean fluxes (using RS, SP, and  
209 CD datasets) with the observed mean fluxes. Analyses of variances (Type II) from linear mixed-effects models  
210 (“nlme” package in R) were used to compare these arithmetic means. The fixed effects in the mixed models were  
211 seasons (summer and autumn) and GHG flux type (measured and predicted fluxes from the RS, SP, and CD  
212 datasets). Random effects of site variability were also included in the mixed models. The measured and predicted  
213 fluxes were log-transformed to the normality assumption. A Tukey post-hoc test (p-value <0.05) of least square  
214 means was used on the mixed models to identify statistically significant differences between the measured, RS-  
215 predicted, SP-predicted, and CD-predicted fluxes.

216 Since many traditional GHG upscaling approaches rely on aggregated fluxes (area-weighted averages), we  
217 also estimated spatial fluxes for the summer and autumn seasons using this technique. GHG fluxes were aggregated  
218 on the landscape scale by multiplying the average fluxes measured for each land use by the area of each land use. We  
219 compared the total landscape fluxes upscaled using this conventional aggregation technique of average fluxes with  
220 the spatial fluxes predicted using the modeling approach.

## 221 **2.6 Identification of GHG ‘hot’ and ‘cold’ spots from predicted landscape fluxes**

222 Statistical approaches were deployed to identify areas that may have disproportionately contributed to the  
223 overall landscape GHG fluxes (e.g., van Kessel et al., 1993; Mason et al., 2017). We defined the threshold for hot  
224 spots using the sum of the median (M) flux and the interquartile (Q3-Q1) flux range (Eq. 4). Thus, the hot spots  
225 within the landscape were identified as the areas with flux values greater (lower for CH<sub>4</sub> uptake) than the set hot spot  
226 threshold. We fixed an inverse threshold (Eq. 5) for cold spots and identified cold spot patches with fluxes below  
227 (above for CH<sub>4</sub> uptake) this threshold. Common emission hot spots were defined as the areas with overlapping



228 elevated emissions of the three GHG fluxes (SR/ER-CO<sub>2</sub>, CH<sub>4</sub>, and N<sub>2</sub>O) within the landscape. The average  
229 (summer and autumn) landscape fluxes were used to identify the hot and cold spots. We also calculated season-  
230 specific thresholds to compare the increase and decrease of hot and cold spot areas between summer and autumn.

231 
$$\textit{Hot spot threshold} = M + (Q3 - Q1) \quad (\text{Eq. 4})$$

232 
$$\textit{Cold spot threshold} = M - (Q3 - Q1) \quad (\text{Eq. 5})$$



### 233 3. Results

#### 234 3.1 RF model performance

235 The performance of the final models selected for the prediction of landscape fluxes varied across input  
236 datasets (RS, SP, and CD), GHG fluxes (SR/ER\_CO<sub>2</sub>, CH<sub>4</sub>, and N<sub>2</sub>O), and land use (forest, grassland, and arable  
237 land) (Table 2). The predictive performance ( $r^2$ ) from the internal cross-validation step was higher in the models  
238 using the CD dataset (range: 0.15 – 0.78) than those using the RS (range: 0.13 – 0.73) and SP (range: 0.15 – 0.63)  
239 datasets (Table 2). The RF models predicting SR/ER\_CO<sub>2</sub> fluxes had much higher  $r^2$  (range: 0.45 – 0.78) than those  
240 predicting N<sub>2</sub>O and CH<sub>4</sub> fluxes (range: 0.13 – 0.56). Arable ecosystem models resulted in much better predictions of  
241 SR/ER\_CO<sub>2</sub> ( $r^2$  range: 0.63 – 0.78) and N<sub>2</sub>O ( $r^2$  range: 0.45 – 0.56) fluxes compared to those for forest and grassland  
242 ecosystems across all data categories (Table 2). The prediction of CH<sub>4</sub> fluxes was also better for arable lands, but  
243 only when using the RS data (Table 2). Stepwise elimination of the least important variables had a minimal effect on  
244 the performances of the trained models (Table B1-B5 in Appendices). The selected models for the different  
245 categories of datasets (RS, SP, and CD) had varying predictor variables across land uses. The forest and grassland  
246 models required the most (5 and 6) predictor variables. In contrast, the least number of predictors (2) were mainly  
247 observed for models describing GHG fluxes from arable soils, especially in the RS and SP categories (Table 2).

248 Comparing the models (CD) applied to predict the landscape fluxes, the site-measured soil moisture content  
249 was a key predictor variable for all three GHG fluxes across land uses. In addition to soil moisture, the measured soil  
250 nitrogen content (NH<sub>4</sub> or SN) and remotely sensed vegetation indices (NDVI, GNDVI, or NDMI) were prevalent  
251 predictors of landscape SR/ER\_CO<sub>2</sub> fluxes. Soil nitrogen content (NO<sub>3</sub> or CN) was also a recurrent predictor of CH<sub>4</sub>  
252 fluxes across land uses. However, the landscape CH<sub>4</sub> models had other varying predictors, such as aspect and soil  
253 temperature in forest models, pH and clay in grassland, and vegetation indices in arable ecosystem models. For N<sub>2</sub>O,  
254 soil inorganic nitrogen (NH<sub>4</sub> or NO<sub>3</sub>) concentrations predicted the fluxes in the forested areas, while vegetation  
255 indices were common predictors in grassland and arable ecosystems (Table 2).

256 Further assessment of model performance was performed through an external validation step comparing the  
257 mean of observed and predicted fluxes in the test dataset ( $n \sim 140$  per flux). The mean measured CO<sub>2</sub> and CH<sub>4</sub>  
258 fluxes were similar to the predicted carbon fluxes across all the data categories (RS, SP, CD). In contrast to the  
259 carbon fluxes, the measured N<sub>2</sub>O fluxes were significantly lower than the predicted fluxes in autumn (Figure A1 in  
260 Appendices).



261 **Table 2:** List of predictor variables and the performance of the selected RF models using either remote sensing (RS), soil physico-  
 262 chemical parameters (SP), or combined (remote sensing and soil parameters) data. The model selection was made after a cross-  
 263 validation (10-fold) step whereby the model's predictive power was tested based on unseen data to avoid overfitting.

| Flux type                                                      | Land use       | Category                              | Predictor variables                                           | 10-fold cross validation |       |       |
|----------------------------------------------------------------|----------------|---------------------------------------|---------------------------------------------------------------|--------------------------|-------|-------|
|                                                                |                |                                       |                                                               | R <sup>2</sup>           | RMSE  | MAE   |
| SR/ER-CO <sub>2</sub> -C (mg m <sup>-2</sup> h <sup>-1</sup> ) | Forest (SR)    | Remotely-sensed data (RS)             | NDVI, GNDVI, NDMI                                             | 0.45                     | 1.76  | 1.55  |
|                                                                | Grassland (ER) |                                       | NDVI, GNDVI, NDMI                                             | 0.46                     | 1.88  | 1.61  |
|                                                                | Arable (ER)    |                                       | Elevation, NDVI, GNDVI, NDMI                                  | 0.73                     | 1.76  | 1.58  |
| CH <sub>4</sub> -C (µg m <sup>-2</sup> h <sup>-1</sup> )       | Forest         |                                       | Aspect, NDVI, GNDVI                                           | 0.14                     | 46.38 | 36.15 |
|                                                                | Grassland      |                                       | Elevation, TPI, NDVI, NDMI                                    | 0.15                     | 29.23 | 21.53 |
|                                                                | Arable         |                                       | GNDVI, NDMI                                                   | 0.35                     | 50.79 | 34.72 |
| N <sub>2</sub> O-N (µg m <sup>-2</sup> h <sup>-1</sup> )       | Forest         |                                       | NDVI, GNDVI, NDMI                                             | 0.13                     | 18.46 | 18.62 |
|                                                                | Grassland      |                                       | NDVI, GNDVI, NDMI                                             | 0.13                     | 20.00 | 18.26 |
|                                                                | Arable         |                                       | GNDVI, NDMI                                                   | 0.53                     | 20.00 | 18.50 |
| SR/ER-CO <sub>2</sub> -C (mg m <sup>-2</sup> h <sup>-1</sup> ) | Forest (SR)    | Soil physico-chemical parameters (SP) | Soil moisture, pH, NH <sub>4</sub> -N, DOC                    | 0.49                     | 1.72  | 1.53  |
|                                                                | Grassland (ER) |                                       | Soil moisture, NH <sub>4</sub> -N, TDN                        | 0.54                     | 1.79  | 1.55  |
|                                                                | Arable (ER)    |                                       | Soil moisture, SN                                             | 0.63                     | 1.94  | 1.70  |
| CH <sub>4</sub> -C (µg m <sup>-2</sup> h <sup>-1</sup> )       | Forest         |                                       | Soil temperature, soil moisture, pH, NO <sub>3</sub> -N, silt | 0.16                     | 44.29 | 33.87 |
|                                                                | Grassland      |                                       | Soil moisture, pH, NO <sub>3</sub> -N, DOC, CN, clay          | 0.29                     | 25.59 | 18.62 |
|                                                                | Arable         |                                       | DOC, CN                                                       | 0.29                     | 44.51 | 32.65 |
| N <sub>2</sub> O-N (µg m <sup>-2</sup> h <sup>-1</sup> )       | Forest         |                                       | Soil moisture, NO <sub>3</sub> -N, NH <sub>4</sub> -N         | 0.15                     | 18.49 | 18.65 |
|                                                                | Grassland      |                                       | Soil moisture, NH <sub>4</sub> -N, CN, clay                   | 0.22                     | 18.02 | 18.37 |
|                                                                | Arable         |                                       | Soil moisture, NO <sub>3</sub> -N, SN, CN                     | 0.46                     | 18.28 | 18.48 |
| SR/ER-CO <sub>2</sub> -C (mg m <sup>-2</sup> h <sup>-1</sup> ) | Forest (SR)    | Combined data (CD)                    | NDVI, GNDVI, NDMI, soil moisture, NH <sub>4</sub> -N, DOC     | 0.57                     | 1.64  | 1.48  |
|                                                                | Grassland (ER) |                                       | GNDVI, soil moisture, NH <sub>4</sub> -N                      | 0.57                     | 1.76  | 1.54  |
|                                                                | Arable (ER)    |                                       | NDVI, GNDVI, soil moisture, SN                                | 0.78                     | 1.68  | 1.51  |
| CH <sub>4</sub> -C (µg m <sup>-2</sup> h <sup>-1</sup> )       | Forest         |                                       | Aspect, soil temperature, soil moisture, NO <sub>3</sub> -N   | 0.21                     | 43.50 | 34.58 |
|                                                                | Grassland      |                                       | Soil moisture, pH, NO <sub>3</sub> -N, CN, clay               | 0.30                     | 25.38 | 18.29 |
|                                                                | Arable         |                                       | GNDVI, NDMI, CN                                               | 0.31                     | 47.59 | 33.30 |
| N <sub>2</sub> O-N (µg m <sup>-2</sup> h <sup>-1</sup> )       | Forest         |                                       | Soil moisture, NO <sub>3</sub> -N, NH <sub>4</sub> -N         | 0.15                     | 18.49 | 18.65 |
|                                                                | Grassland      |                                       | NDVI, soil moisture                                           | 0.25                     | 18.05 | 18.37 |
|                                                                | Arable         |                                       | NDVI, GNDVI, NDMI, soil moisture                              | 0.56                     | 18.36 | 18.52 |

264

### 265 3.2 Observed versus predicted GHG fluxes

266 The measured and predicted GHG fluxes for all the sampling points had significant ( $p < 0.001$ ) linear  
 267 relationships (Figure 3). The model predictions of SR/ER\_CO<sub>2</sub> fluxes were better ( $r^2$ ; 0.49 – 0.67) than for soil CH<sub>4</sub>  
 268 ( $r^2$ ; 0.39 – 0.46) or N<sub>2</sub>O ( $r^2$ ; 0.34 – 0.43) flux predictions across the three input datasets. Based on the estimated  
 269 slopes, the predicted values were 35 – 46% lower than the measured values for SR/ER\_CO<sub>2</sub> fluxes. Compared to  
 270 CO<sub>2</sub>, the CH<sub>4</sub> and N<sub>2</sub>O predicted fluxes were lower (CH<sub>4</sub> 53 – 58%; N<sub>2</sub>O 60 – 65%) than the measured fluxes,



271 primarily due to the underestimation of high fluxes. Based on  $r^2$  values, the performances of the different predictor  
272 datasets were in the order of CD>RS>SP for carbon fluxes and CD>SP>RS for  $N_2O$  fluxes (Figure 3).

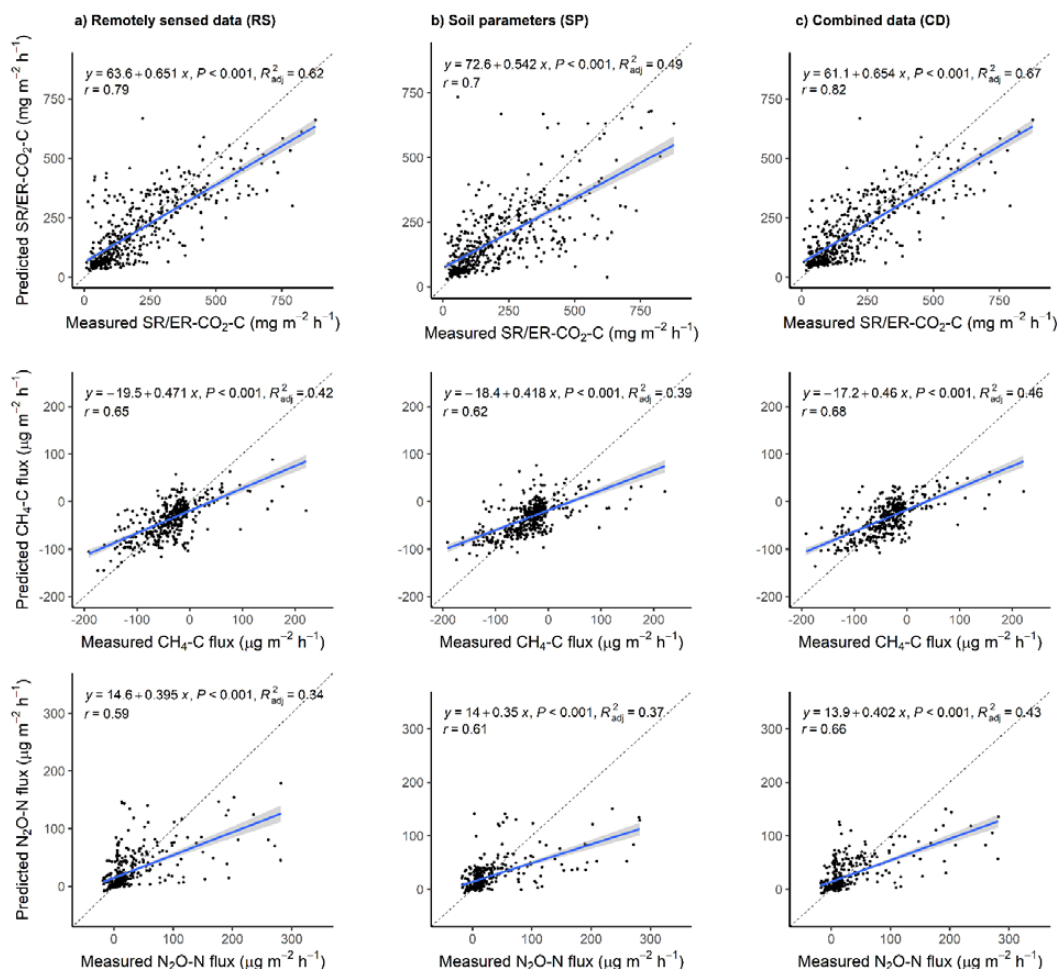

273

274 **Figure 3:** Linear regressions (with 95% confidence bands) of the measured and predicted GHG fluxes using remotely sensed data  
275 (RS), soil physico-chemical parameters (SP), and combined data (CD). GHG fluxes from all the sampling locations were considered  
276 in this regression analysis. The dotted line represents the 1:1 line.

### 277 3.3 Spatio-temporal variation in modeled landscape-scale fluxes

278 Predicted landscape fluxes for the summer and autumn seasons ranged from  $+27.7 - +733.3\ mg\ m^{-2}\ h^{-1}$  for  
279  $CO_2$ -C,  $-148.4 - +89.4\ \mu g\ m^{-2}\ h^{-1}$  for  $CH_4$ -C, and from  $-8.8 - +189.9\ \mu g\ m^{-2}\ h^{-1}$  for  $N_2O$ , and did not differ much in  
280 dependence of the input dataset used (RS, SP, or CD) (Table B6 in Appendices). However, the predicted flux ranges  
281 for the landscape were narrower than the measured fluxes, which ranged from  $8.7$  to  $877.0\ mg\ m^{-2}\ h^{-1}$  for  $CO_2$ -C,  
282 from  $-214.1 - +221.2\ \mu g\ m^{-2}\ h^{-1}$  for  $CH_4$ -C and from  $-18.1 - +281.8\ \mu g\ m^{-2}\ h^{-1}$  for  $N_2O$ -N. Since the CD dataset



283 revealed models with better predictions for all GHG fluxes than the RS and SP datasets, we used GHG fluxes  
284 predicted from CD predictors for seasonal and land use comparisons.

285 Most of the landscape area (99.2%) had higher SR/ER\_CO<sub>2</sub> fluxes in summer than in autumn, with a small  
286 proportion of arable and grassland ecosystems having an opposite trend. Around 76% of the landscape also had  
287 higher N<sub>2</sub>O fluxes in summer than in autumn. The remaining landscape area (24%) had higher N<sub>2</sub>O fluxes in autumn  
288 than in summer, particularly in forested areas. CH<sub>4</sub> uptake rates were lower in summer than autumn in most of the  
289 landscape (63%), especially in arable and grassland soils. However, an opposite trend was found for about 37% of  
290 the landscape area, dominated by forests, where CH<sub>4</sub> uptake rates were lower in autumn than in summer (Figure 4c).

291 High spatial heterogeneities (within short distances of <2 m) of the predicted landscape fluxes were  
292 observed in each land use. Overall, spatial variations were more prominent in summer than in autumn (Figure 4;  
293 Table B6 in Appendices). The spatial variability of SR/ER\_CO<sub>2</sub> fluxes was higher (with a range of up to 2.6-folds)  
294 on arable soils than forest and grassland soils, with multiple patches of low fluxes surrounded by high fluxes. CH<sub>4</sub>  
295 fluxes on arable lands were also heterogenous, with the soils acting as CH<sub>4</sub> sinks and sources within a few meters,  
296 especially during summer (Figure 4a). For N<sub>2</sub>O fluxes, high spatial heterogeneities were observed on grassland soils  
297 in summer, as N<sub>2</sub>O uptake and emission of the same or even higher order of magnitude occurred at neighboring  
298 pixels. Arable soils in autumn were also highly heterogeneous, with patches of high N<sub>2</sub>O fluxes surrounded by low  
299 fluxes (Figure 4b).



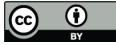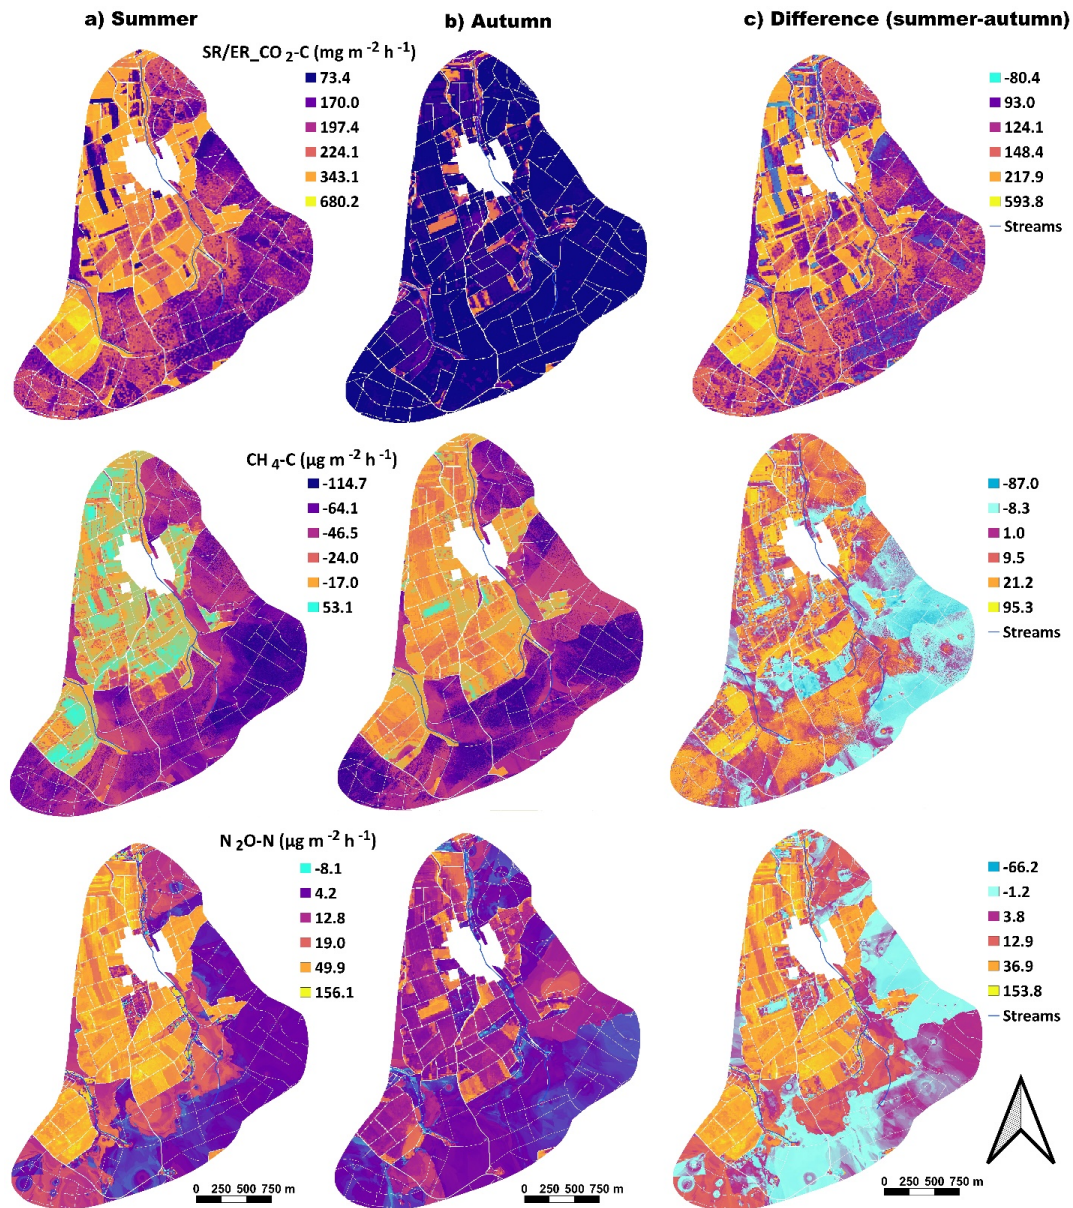

300

301

302

303

**Figure 4:** Landscape maps of SR/ER\_CO<sub>2</sub>, CH<sub>4</sub>, and N<sub>2</sub>O for (a) summer, (b) autumn seasons, and (c) the difference maps showing the variation of the autumn from the summer fluxes. The surface fluxes were predicted using RF models trained with combined (remote-sensing and site-measured soil parameters) data (CD; Table 2).





### 304 3.4 Hot spots and cold spots

305 The hot and cold spots of the GHG fluxes were identified from the average (summer and autumn) upscaled  
306 landscape fluxes (Figure 5a). Using equation 4, the SR/ER\_CO<sub>2</sub> and N<sub>2</sub>O spatial hot spots had threshold values  
307 >231.5 mg CO<sub>2</sub>-C m<sup>-2</sup> h<sup>-1</sup> for CO<sub>2</sub> and >36.8 μg N<sub>2</sub>O-N m<sup>-2</sup> h<sup>-1</sup> for N<sub>2</sub>O. These hot spots covered a relatively small  
308 portion (~16.7%) of the landscape, yet they played a significant role, especially the N<sub>2</sub>O hot spots which accounted  
309 for 42% of the landscape fluxes. Around 29% of the total SR/ER\_CO<sub>2</sub> landscape flux emanated from the hot spot  
310 areas (Figure 5). Overall, the SR/ER\_CO<sub>2</sub> and N<sub>2</sub>O hot spots were mainly located on arable lands (77.0% and 94.5%,  
311 respectively) and grasslands (22.9% and 5.5%, respectively). Compared to the SR/ER\_CO<sub>2</sub> and N<sub>2</sub>O hot spots, the  
312 hot and cold spots of CH<sub>4</sub> uptake were observed in smaller regions (3.1% and 7.3%) of the landscape with high soil  
313 CH<sub>4</sub> uptake rates (>87.3 μg CH<sub>4</sub>-C m<sup>-2</sup> h<sup>-1</sup>) and low soil CH<sub>4</sub> uptake rates (<3.4 μg CH<sub>4</sub>-C m<sup>-2</sup> h<sup>-1</sup>). The CH<sub>4</sub> uptake  
314 hot spots, exclusively on the forested soils, offset 8% of the landscape CH<sub>4</sub> fluxes (Figure 5). The cold spots  
315 occupied 7% of the landscape and were primarily on arable soils (99.6%), accounting for 2% of the landscape's CH<sub>4</sub>  
316 emissions.

317 Common hot spots, with overlapping areas with elevated GHG emissions (i.e., SR/ER\_CO<sub>2</sub> and N<sub>2</sub>O hot  
318 spot areas and CH<sub>4</sub> uptake cold spot areas), were mainly on arable soils (99.87%), with few located in grasslands  
319 (0.12%) and forests (0.01%). Overall, these patches covered 1.5% of the landscape area and contributed 5%, 1%, and  
320 8% of the SR/ER\_CO<sub>2</sub>, CH<sub>4</sub>, and N<sub>2</sub>O emissions within the landscape (Figure A2 in Appendices). Based on field  
321 observations of the sampling sites (n=14) in the common hot spots, the sites at arable lands were either cropped with  
322 barley or wheat. These arable common hot spots also had higher soil moisture content and NO<sub>3</sub> concentrations than  
323 the average values recorded at all the other sampling locations. The common hot spots in the forest were found along  
324 the riparian zones if either nitrogen-fixing alder trees were present or if grazed by cattle. Soil moisture (%), DOC,  
325 NO<sub>3</sub>, and NH<sub>4</sub> concentrations at these sites were also higher than mean values across all sampling points. The  
326 grassland common hot spot regions were densely covered by nitrogen-fixing clover, with some located along the  
327 riparian zones (Figure A3; Table B7 in Appendices).

328 Comparison of the GHG emission hot spots in summer and autumn using season-specific thresholds  
329 revealed significant shifts in their geo-locations between the two seasons (Figure A4 in Appendices). SR/ER\_CO<sub>2</sub>  
330 hot spot regions expanded by 46% from summer to autumn, even though the emissions from the former season were  
331 higher. Unlike CO<sub>2</sub>, N<sub>2</sub>O emission hot spots and CH<sub>4</sub> uptake cold spots contracted by 23% and 86%, respectively,  
332 from summer to autumn.

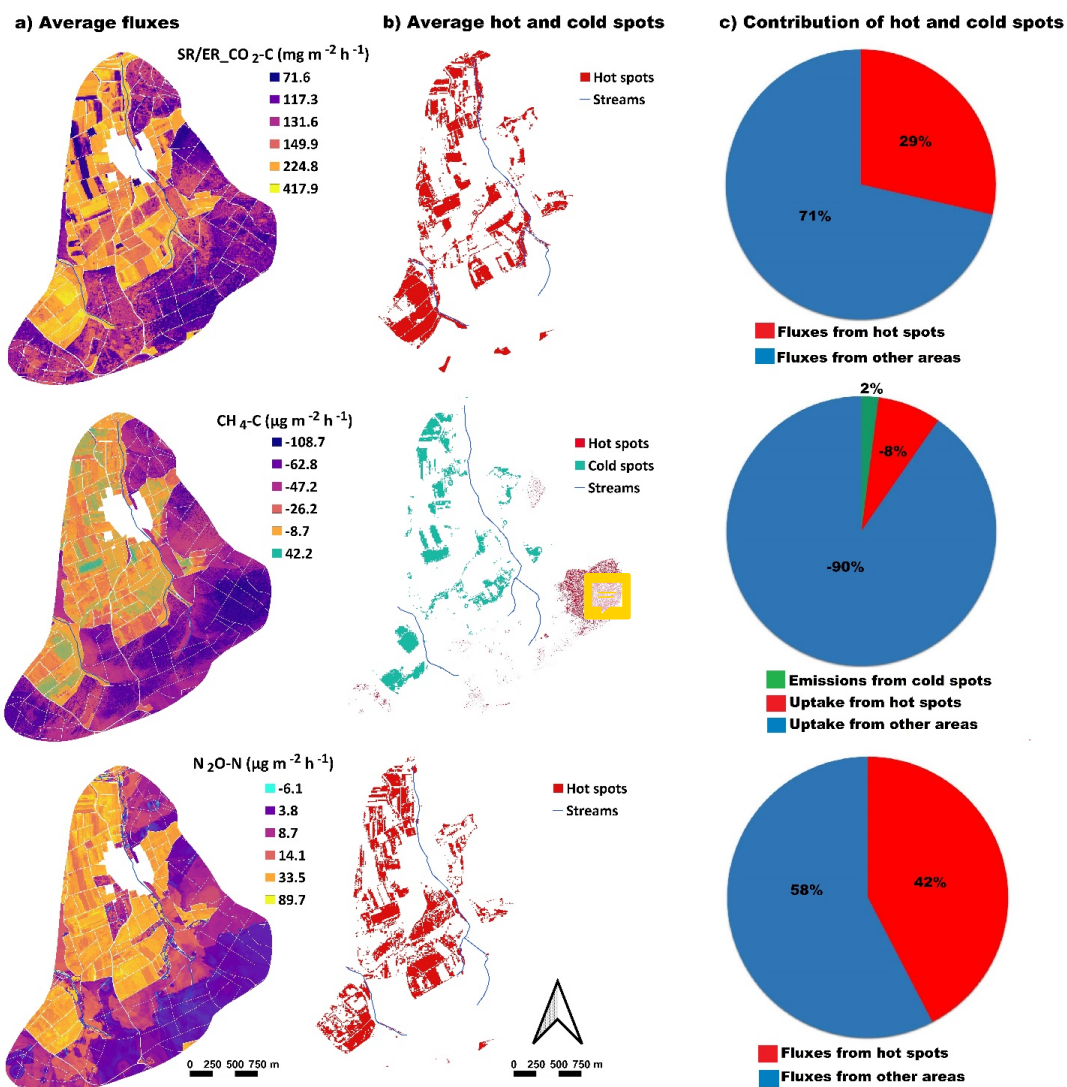

333

334 **Figure 5:** Maps showing (a) the average GHG fluxes and (b) the average hot spot and cold spot regions on the landscape for the  
 335 summer and autumn seasons. The pie charts show the contribution (%) of hot and cold spots to total landscape fluxes. For this  
 336 analysis, landscape fluxes were predicted using the combined data (CD; Table 2; Figure 3).

### 337 3.5 Comparison of upscaling approaches

338 Seasonal differences in spatial patterns and magnitudes of GHG fluxes were observed for upscaled fluxes  
 339 using either RF modeling or mean values of measured fluxes. In both approaches, the SR/ER\_CO<sub>2</sub> and N<sub>2</sub>O  
 340 landscape fluxes were an order of magnitude higher in summer than in autumn. The CH<sub>4</sub> uptake rates were higher in  
 341 autumn than in summer but within the same order of magnitude. In summer, the landscape-scale SR/ER\_CO<sub>2</sub> and  
 342 N<sub>2</sub>O fluxes estimated using the area-weighted average approach were 26% and 50% higher than the RF-modelled



343 fluxes. The contrary was observed in autumn, where the later methodology produced slightly (4% and 11%) higher  
344 fluxes than the area-weighted mean estimates.

345 The entire landscape CH<sub>4</sub> uptake estimates for autumn using the area-weighted mean were 16% higher than  
346 the modeled estimates. Contrary to autumn, the area-weighted mean approach had slightly lower estimates of CH<sub>4</sub>  
347 uptake than the modeling approach in summer. Additionally, the CH<sub>4</sub> surface flux estimates for the whole arable land  
348 in summer were net sinks (-0.9 CH<sub>4</sub>-C g h<sup>-1</sup>) using the RF modeling approach contrary to the net sources (15.5 CH<sub>4</sub>-  
349 C g h<sup>-1</sup>) estimated by the area-weighted mean method. Overall, the total landscape fluxes estimated using the area-  
350 weighted mean approach had up to two orders of magnitude higher uncertainty (standard error) than the modeled  
351 landscape fluxes (Figure 6).

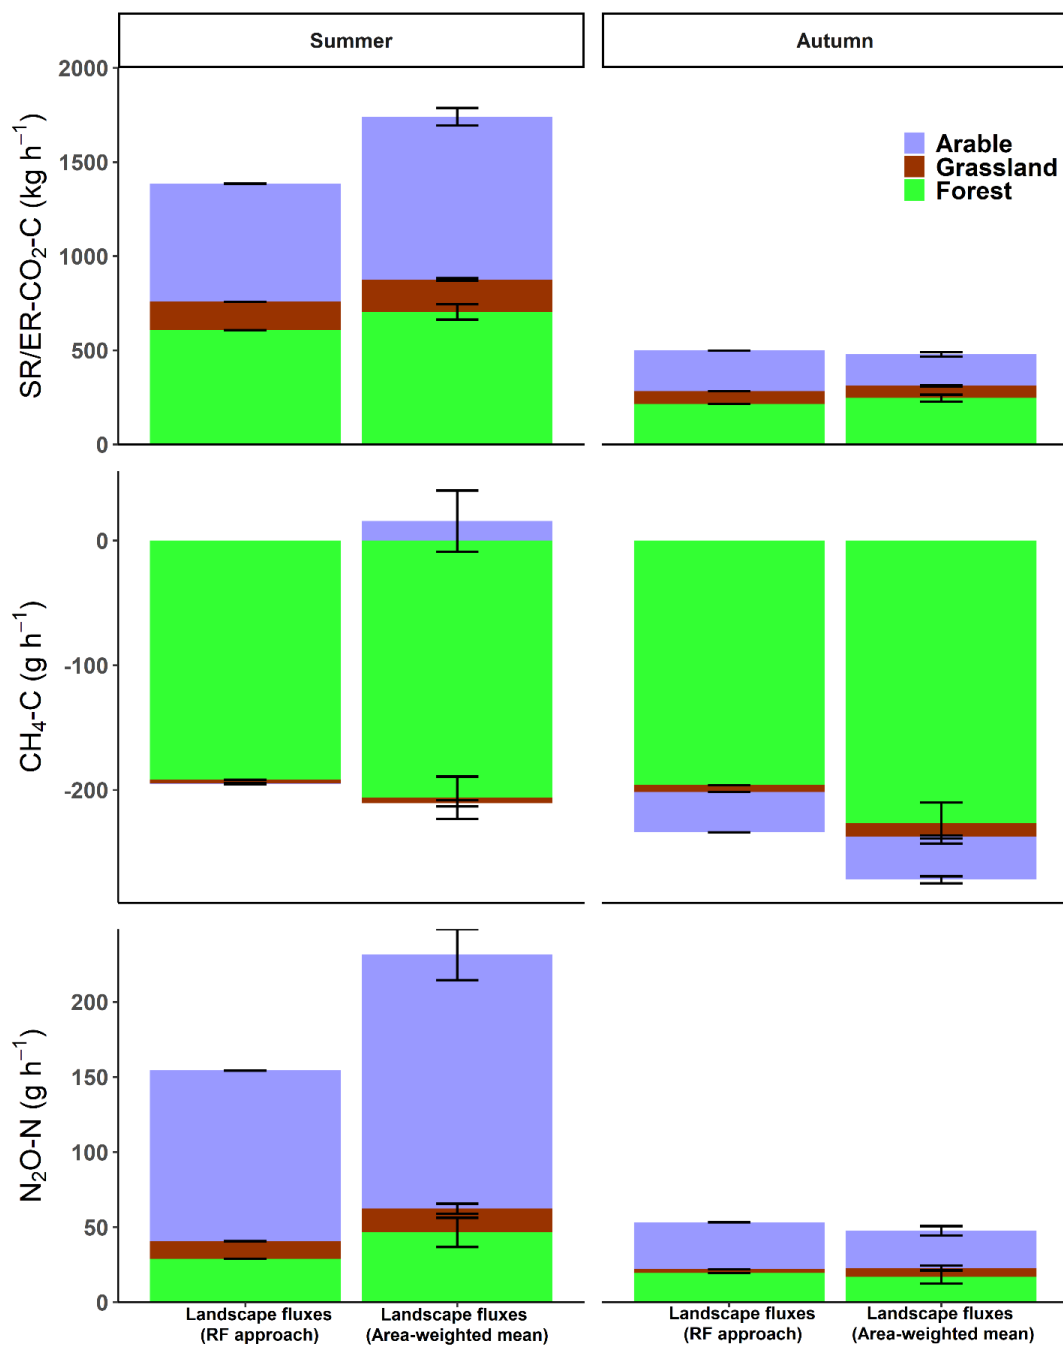

352

353

354

**Figure 6:** The total landscape fluxes (+SE) predicted using random forest (RF) models (with combined dataset) and the fluxes estimated using the area-weighted mean approach where the average point-measured fluxes were multiplied by the landscape area.



## 355 4. Discussion

### 356 4.1 Efficiency of in-situ soil parameters and remote-sensing data in upscaling GHG fluxes

357 Our study showed that remotely-sensed (RS) data and measured soil parameters (SP) could effectively  
358 upscale soil-atmosphere CO<sub>2</sub>, N<sub>2</sub>O, and CH<sub>4</sub> fluxes from point chamber measurements across a heterogenous  
359 landscape with mixed land uses. The improved prediction performance of the combined data (CD) sources indicates  
360 the importance of incorporating controls of soil GHG fluxes that are remotely sensed and ground-based field  
361 observations. The prediction models in this study suggested that the Sentinel-2-derived indices (NDVI, GNDVI, and  
362 NDMI) were more effective predictors than the DEM-derived terrain attributes (elevation, slope, aspect, TWI, and  
363 TPI). This finding is supported by the appearance of the Sentinel-2-derived indices in the prediction models of the  
364 three GHGs, contrary to only one DEM index (aspect) that appeared in the CH<sub>4</sub> flux prediction models for the forest  
365 ecosystem. The minor role of DEM indices in this study can be attributed to the relatively flat terrain of our study  
366 landscape (Figure 1b) and is further backed by the lack of spatial variation in the measured GHG fluxes with slope,  
367 yet slope was considered during site stratification (Wangari et al., 2022). Another possible explanation could be that  
368 soil wetness, a common predictor of all the GHG fluxes across the landscape, was better represented by the site-  
369 measured soil moisture content and the NDMI index (vegetation water content), than any of the DEM terrain  
370 attributes, including the TWI that focuses on moisture conditions, as they lack a temporal dimension.

371 Compared with other studies that have upscaled GHG fluxes using the random forest algorithm, we  
372 considered more site-measured data on soil parameters, all three GHG fluxes, and different land uses (Table 3). The  
373 prediction accuracies of soil respiration for our mixed forest ecosystem (3.3 km<sup>2</sup>) were slightly better than those  
374 reported for a smaller forested headwater watershed (0.12 km<sup>2</sup>) in Maryland, USA (Warner et al., 2019). Our CH<sub>4</sub>  
375 prediction performance for forest soils was comparable to those of a boreal forest landscape (Vainio et al., 2021).  
376 However, our CH<sub>4</sub> prediction performance was up to 3.6-folds lower than those of a forested headwater watershed  
377 and peatland soils, which can be attributed to higher and more homogenous CH<sub>4</sub> production in such ecosystems  
378 (Warner et al., 2019; Räsänen et al., 2021). Our CH<sub>4</sub> and N<sub>2</sub>O model prediction accuracies for arable soils were  
379 better than those for arable soils in New South Wales, Australia, which only considered input data from ground-  
380 based sensors such as soil pH and clay content (McDaniel et al., 2017). Nevertheless, caution has to be taken when  
381 interpreting any conclusions from these study comparisons due to the limitations of different model validation  
382 techniques, different predictor variables used for modeling, and the different ecosystems and spatial scales of  
383 measurement and predictions.

### 384 4.2 Seasonal variability of landscape fluxes

385 The GHG fluxes predicted by the RF model in this study revealed seasonal trends of up to 3-fold higher  
386 CO<sub>2</sub> and N<sub>2</sub>O fluxes in summer and 1.2-fold higher CH<sub>4</sub> uptake in autumn, which were also evident in the measured  
387 fluxes at the sampling points (Wangari et al., 2022). These trends can be attributed to seasonal changes in soil  
388 parameters and vegetation within the landscape that were well captured by the measured soil parameters and  
389 Sentinel-2-derived indices in the prediction models. The higher soil moisture, mineral nitrogen, and vegetation cover  
390 observed during the summer growing season enhanced the respiration rates (SR/ER\_CO<sub>2</sub>) and N<sub>2</sub>O emissions,



391 particularly in arable ecosystems, which were flux hot spots for both gases. Root respiration of growing plants can  
392 also enhance N<sub>2</sub>O production through denitrification by creating anaerobic conditions and supplying labile exudates  
393 to denitrifying microbes (Butterbach-Bahl & Dannenmann, 2011; Malique et al., 2019). Previous studies have shown  
394 that higher mineral nitrogen and soil moisture content can enhance N<sub>2</sub>O production in soils through an increased  
395 supply of substrates and the creation of anaerobic conditions that enhance denitrification rates (Barton et al., 1999;  
396 Ciarlo et al., 2006; Butterbach-Bahl et al., 2013). The lower CH<sub>4</sub> uptake rates in summer can be primarily explained  
397 by the observed higher soil moisture content, which has been previously reported to hinder CH<sub>4</sub> oxidation by slowing  
398 down gas (atmospheric CH<sub>4</sub>) diffusion in soils (Le Mer & Roger, 2001).

399 The high-resolution (1 m pixel size) scaled-up fluxes could also identify detailed temporal patterns of the  
400 GHG fluxes across the landscape, thus, revealing trends that were otherwise undetectable in the aggregated measured  
401 (point) fluxes. To illustrate, parts of the landscape (24% and 37%) showed even opposite trends of higher N<sub>2</sub>O fluxes  
402 and lower CH<sub>4</sub> uptake rates in autumn, and these areas were **predominantly in the forested ecosystem**. Such fine-  
403 scale patterns of GHG fluxes result from land use-specific local effects depending on the season. **For example,**  
404 **decaying fallen leaves during autumn can favor denitrification in forest soils but not in grassland or arable**  
405 **ecosystems**. The higher CH<sub>4</sub> uptake rates in summer could be due to the increased exposure of some forest soils to  
406 the sun leading to drier and warmer soils that promote CH<sub>4</sub> oxidation (Steinkamp et al., 2000). This finding is  
407 supported by the importance of aspect as a predictor of landscape CH<sub>4</sub> fluxes in the forest ecosystem, which  
408 influences the amount of incoming radiation an area receives.

#### 409 **4.3 Importance of hot spots and cold spots of landscape-scale GHG fluxes**

410 The high spatial resolution of our predicted GHG fluxes enabled the identification of areas across the  
411 landscape that functioned as hot spots (of soil CH<sub>4</sub> uptake, SR/ER\_CO<sub>2</sub>, and N<sub>2</sub>O) or cold spots of soil CH<sub>4</sub> uptake.  
412 Based on field observations and analyses of important predictor variables, the existence of these hot and cold spots  
413 was primarily driven by human activities such as fertilizer application, crop growing and tillage, and landscape  
414 environmental parameters related to seasonality and proximity to riparian areas. This finding is supported by the  
415 primary association of the SR/ER\_CO<sub>2</sub> and N<sub>2</sub>O hot spots and CH<sub>4</sub> uptake cold spots within arable ecosystems since  
416 these systems showed higher soil mineral nitrogen concentrations than grassland and forest soils. The hot spots of  
417 SR/ER\_CO<sub>2</sub> and N<sub>2</sub>O observed on the grassland ecosystem can be attributed to the primary location of grasslands  
418 along the riparian areas. **Increased soil moisture values, a key characteristic of the riparian regions, has also been**  
419 **reported to drive elevated soil GHG fluxes** (Kaiser et al., 2018; Vainio et al., 2021).

420 Spatial hot spots of SR/ER\_CO<sub>2</sub> and N<sub>2</sub>O played a crucial role in determining total landscape fluxes,  
421 accounting for up to 42% of the total predicted landscape fluxes, despite their relatively low (~16%) coverage area.  
422 Such high contributions suggest that failure to capture these hot spots results in large uncertainties in landscape GHG  
423 flux estimates. Overall, the contribution of the hot spot areas (of CO<sub>2</sub>, N<sub>2</sub>O, and CH<sub>4</sub> emissions) to the landscape  
424 fluxes decreased in the order of N<sub>2</sub>O>CO<sub>2</sub>>CH<sub>4</sub>. **This finding emphasizes the importance of capturing the N<sub>2</sub>O hot**  
425 **spots and improving the spatial coverage of N<sub>2</sub>O measurements**, as it can introduce enormous uncertainty in  
426 landscape fluxes. A similar finding emphasizing the importance of N<sub>2</sub>O flux heterogeneities has been concluded in a

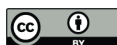

427 previous study, which recorded more sampling locations required for improved N<sub>2</sub>O flux estimates than CO<sub>2</sub> and  
428 CH<sub>4</sub> at a landscape scale (Wangari et al., 2022).

429 Identifying common patches with elevated emissions of the three GHGs can inform priority areas for  
430 implementing localized mitigation measures within a landscape. These common patches covered only 1.5% of our  
431 landscape (~0.2 km<sup>2</sup>) and had the highest GHG fluxes contributing around 5%, 1%, and 8% of the landscape CO<sub>2</sub>,  
432 CH<sub>4</sub>, and N<sub>2</sub>O emissions. The location of these patches primarily (99.9%) on arable land emphasized the significant  
433 role of focusing on mitigating GHG fluxes from arable soils. The mitigation strategies may include adjusting the  
434 fertilizer application rates, especially in specific areas that hold more water, probably due to topographical or soil  
435 conditions (e.g., Hassan et al., 2022). This finding is further supported by the high soil moisture content measured at  
436 the sampling sites within the common patches of elevated GHG fluxes. In contrast to hot spot regions of elevated  
437 GHG emissions, CH<sub>4</sub> uptake hotspots inform future mechanisms for leveraging the GHG sink ability of soils, such as  
438 expanding local forests. This finding is supported by uptake hot spots identified on forest soils in this study,  
439 offsetting 8% of the total landscape CH<sub>4</sub> flux. The expansion of forested areas will also likely have a much higher  
440 mitigation impact via CO<sub>2</sub> sequestration. Although some of the above strategies are currently applied at broader  
441 scales (1 km<sup>2</sup>), localized mitigation strategies may be required at smaller scales (<100 m<sup>2</sup>), especially at highly  
442 heterogeneous landscapes with a high variability of agricultural practices. We also found significant shifts in the geo-  
443 locations of hotspot regions between summer and autumn, suggesting that seasonal changes in land management and  
444 soil conditions may also lead to a temporal expansion or contraction of the hot spot regions. This finding further  
445 emphasizes the need for time-based mitigation strategies, such as considering fertilizer application times, which not  
446 only target the spatial hotspots but also consider the temporal patterns that result in peak emissions (e.g., Wagner-  
447 Riddle et al., 2020).

#### 448 4.4 Comparison of upscaling approaches

449 Contrary to the area-weighted upscaling approach of spatial aggregation of chamber fluxes (Webster et al.,  
450 2008; Molodovskaya et al., 2011; Rosenstock et al., 2016), random forest modeling allowed us to estimate the entire  
451 spatial distributions of the fluxes at high spatial resolution (1 m pixel size), capturing both cold spots and hot spots.  
452 In agreement with our hypotheses, the landscape fluxes were either over or under-estimated by the area-weighted  
453 average approach compared to the RF modeling approach. The overestimated landscape CO<sub>2</sub> and N<sub>2</sub>O fluxes by up  
454 to 50% during the peak summer season suggest an overrepresentation of the high fluxes measured at most of the  
455 sampling points, resulting in elevated mean and upscaled fluxes. Furthermore, landscape CH<sub>4</sub> uptake rates were  
456 overestimated during the peak autumn season. Previous studies have also observed a similar trend of elevated mean  
457 CH<sub>4</sub> uptake rates at measured sites, which they attributed to the over-representation of high uptake rates during the  
458 peak uptake seasons (Warner et al., 2019). Conversely, the underestimation of CO<sub>2</sub>, N<sub>2</sub>O, and CH<sub>4</sub> uptake, especially  
459 on arable soils, coincided with the low flux season, implying reduced mean fluxes due to the overrepresentation of  
460 the low fluxes. An alternative explanation of the differences in landscape flux estimates from both approaches could  
461 be the underestimation of high fluxes by the RF models, which we also found in our study. However, the landscape  
462 means of RF predicted and measured fluxes from 30% of our sampled sites were primarily similar (Figure A1 in





463 Appendices), suggesting that the lack of spatial representation of all hot and cold spots by the area-weighted mean  
464 approach rather than the inability of the RF models to reproduce high values accounted for the findings above.

465 Collectively, our results illustrated that the representativeness of landscape fluxes using aggregated chamber  
466 fluxes might be influenced by the spatial and temporal heterogeneity of the fluxes. This finding aligns with previous  
467 results on the required number of chamber measurement locations for reliable landscape fluxes that varied with land  
468 use and season (Warner et al., 2019, Wangari et al., 2022). The high (50%) overestimation of landscape N<sub>2</sub>O fluxes  
469 suggested the higher sensitivity of reliably estimating N<sub>2</sub>O fluxes using the (aggregated means) conventional method.  
470 Previous studies have also emphasized the importance of N<sub>2</sub>O fluxes in constraining uncertainties in landscape flux  
471 quantification (e.g., Wangari et al., 2022). Compared to the suggested way of lowering landscape-scale flux  
472 uncertainties in the conventional estimates by increasing the number of chamber measurements within a landscape  
473 (Wangari et al., 2022), the modeling approach can be a less resource-intensive alternative.

474 Combining high-resolution remote sensing data and measured soil parameters to upscale the chamber fluxes  
475 reduced the biases and the aforementioned landscape-scale flux uncertainties. The reduced uncertainties in the  
476 modeled landscape fluxes can be attributed to the relation of multiple underlying controls of soil GHG fluxes, which  
477 have high seasonal and spatial variability. Remote sensing datasets have unlimited spatial extents with high spatial  
478 resolution and thus allowing reliable prediction of spatially continuous fluxes that can capture the cold and hot spots  
479 over different seasons across heterogeneous landscapes (Warner et al., 2019; Räsänen et al., 2021). This study's high  
480 spatial resolution upscaling (1 m pixel) enabled capturing small-scale variabilities in GHG fluxes within short  
481 distances, which would have been missed ~~out~~ with coarser resolution upscaling. Upscaling at a finer resolution was  
482 especially relevant due to the heterogeneous nature of our study landscape, related to different land uses, soil types,  
483 and slope positions.

## 484 5. Conclusions

485 This study demonstrated the potential of improved prediction performance when combining field-based  
486 measurements of soil parameters with remotely-sensed data in scaling up flux (chamber) measurements from  
487 stratified sites. Among the remotely-sensed predictors, Sentinel-2 indices played a more significant role than DEM-  
488 derived attributes in upscaling the GHG fluxes across our relatively flat landscape terrain. The high-resolution (1 m  
489 pixel size) scaled-up fluxes effectively revealed fine-scale (within a few meters) hot and cold spots of GHG fluxes  
490 across a mixed land use landscape. The N<sub>2</sub>O hot spots were more significant sources of GHGs as they contributed  
491 42% of the landscape N<sub>2</sub>O fluxes compared to SR/ER\_CO<sub>2</sub> and CH<sub>4</sub> emission hotspots, which accounted for 29%  
492 and 2% of the landscape CO<sub>2</sub> and CH<sub>4</sub> emissions, respectively. Arable soils, which had higher N<sub>2</sub>O fluxes, also had  
493 patches with elevated emissions of the three GHGs, especially in areas with high soil moisture content. These  
494 findings emphasize the importance of targeted local mitigation measures, especially for agricultural soils, in  
495 mitigating landscape GHG fluxes. Compared to RF upscaling, the area-weighted average approach lacked detailed  
496 spatiotemporal patterns of landscape fluxes, which can prevent targeted mitigation measures to some extent.





**Table 3:** Comparison of other that have upscaled landscape fluxes using the random forest algorithm.

| Study area                           | Landscape area (km <sup>2</sup> ) | Number of sites | Predictor variables                                                                                                                                                                                                                                                                                                                                     | Measurement period                         | Model algorithm                                      | Type of validation                                   | Prediction period                             | Land use                     | Flux                               | Model validation (r <sup>2</sup> )              | Location                        | Reference              |
|--------------------------------------|-----------------------------------|-----------------|---------------------------------------------------------------------------------------------------------------------------------------------------------------------------------------------------------------------------------------------------------------------------------------------------------------------------------------------------------|--------------------------------------------|------------------------------------------------------|------------------------------------------------------|-----------------------------------------------|------------------------------|------------------------------------|-------------------------------------------------|---------------------------------|------------------------|
| Gießen, Central Germany              | 5.85                              | 268             | <ul style="list-style-type: none"> <li>◦ DEM indices: elevation, slope, aspect, TWI &amp; TPI</li> <li>◦ Sentinel-2 indices: NDVI, GNDVI, &amp; NDMI</li> <li>◦ In-situ data: soil temperature, moisture, pH, bulk density, NO<sub>3</sub><sup>-</sup>-N, NH<sub>4</sub><sup>+</sup>-N, DOC, TDN, TN, TOC, CN, sand, silt &amp; clay content</li> </ul> | July & September, 2020                     | Random forest                                        | 10-fold repeated cross-validation                    | Summer (Jul) and autumn (Sep)                 | Forest, grassland, arable    | SR/ER_CO <sub>2</sub>              | 0.57, 0.57, 0.78                                | 50°30'4.23" N, 8°33'2.82" E     | This study             |
| Hytälä, southern Finland             | 0.1                               | 60              | <ul style="list-style-type: none"> <li>◦ DEM indices: slope, TWI, TRI &amp; DTW</li> <li>◦ In-situ data: soil moisture</li> </ul>                                                                                                                                                                                                                       | March-December 2013 & May-December 2014    | Random forest                                        | Distance-blocked leave-out cross-                    | Summer<br>Autumn                              | Forest (boreal)              | CH <sub>4</sub>                    | 0.26<br>0.39                                    | 61°5'10" N, 24°1'70" E          | Vainio et al. (2021)   |
| Marland, USA                         | 0.12                              | 20              | <ul style="list-style-type: none"> <li>◦ DEM indices: slope, aspect, TWI, flow line curvature, channel network base level, upslope accumulation area, etc.</li> <li>◦ In-situ data: soil temperature &amp; moisture</li> </ul>                                                                                                                          | September 2014 - November 2016 (bimonthly) | Quantile regression forest                           | Model accuracy and prediction uncertainty assessment | Early summer: May-Jul<br>Late summer: Aug-Sep | Forest (headwater watershed) | CO <sub>2</sub> & CH <sub>4</sub>  | 0.61, 0.50 (CO <sub>2</sub> , CH <sub>4</sub> ) | 39°42' N, 75°50' W              | Werner et al. (2019)   |
| Pallas area, northern Finland        | 12.4                              | 279             | <ul style="list-style-type: none"> <li>◦ DEM indices: elevation, slope, aspect, TWI, TPI &amp; DTW</li> <li>◦ Sentinel-1 &amp; 2 indices: NDVI, GNDVI, NDWI, etc</li> <li>◦ In-situ data: soil moisture, vegetation (e.g., leaf area index)</li> </ul>                                                                                                  | July 3 - 13, 2019                          | Random forest regressions and binary classifications | Random forest out-of-bag assessment                  | Summer (July)                                 | Forest (peatland)            | CH <sub>4</sub>                    | 0.76                                            | 67°57'–68°0' N, 24°10'–24°15' E | Räsänen et al. (2021)  |
| Narrabri, New South Wales, Australia | 0.16                              | >100            | <ul style="list-style-type: none"> <li>◦ RSX-1 Gamma Detector variables: clay content, mineralogy, soil pH</li> <li>◦ DUALEM-4 &amp; Electromagnetic sensor variables: moisture, salinity, clay, thickness of the solum</li> </ul>                                                                                                                      | May 23-31, 2015                            | Quantile regression forest                           | Linear regression with validation dataset            | Early summer (May)                            | Arable                       | CH <sub>4</sub> & N <sub>2</sub> O | 0.24, 0.07 (CH <sub>4</sub> , N <sub>2</sub> O) | 149.82° E, 30.28° S             | McDaniel et al. (2017) |



498 **Appendices**

499 **Appendix A: Figures**

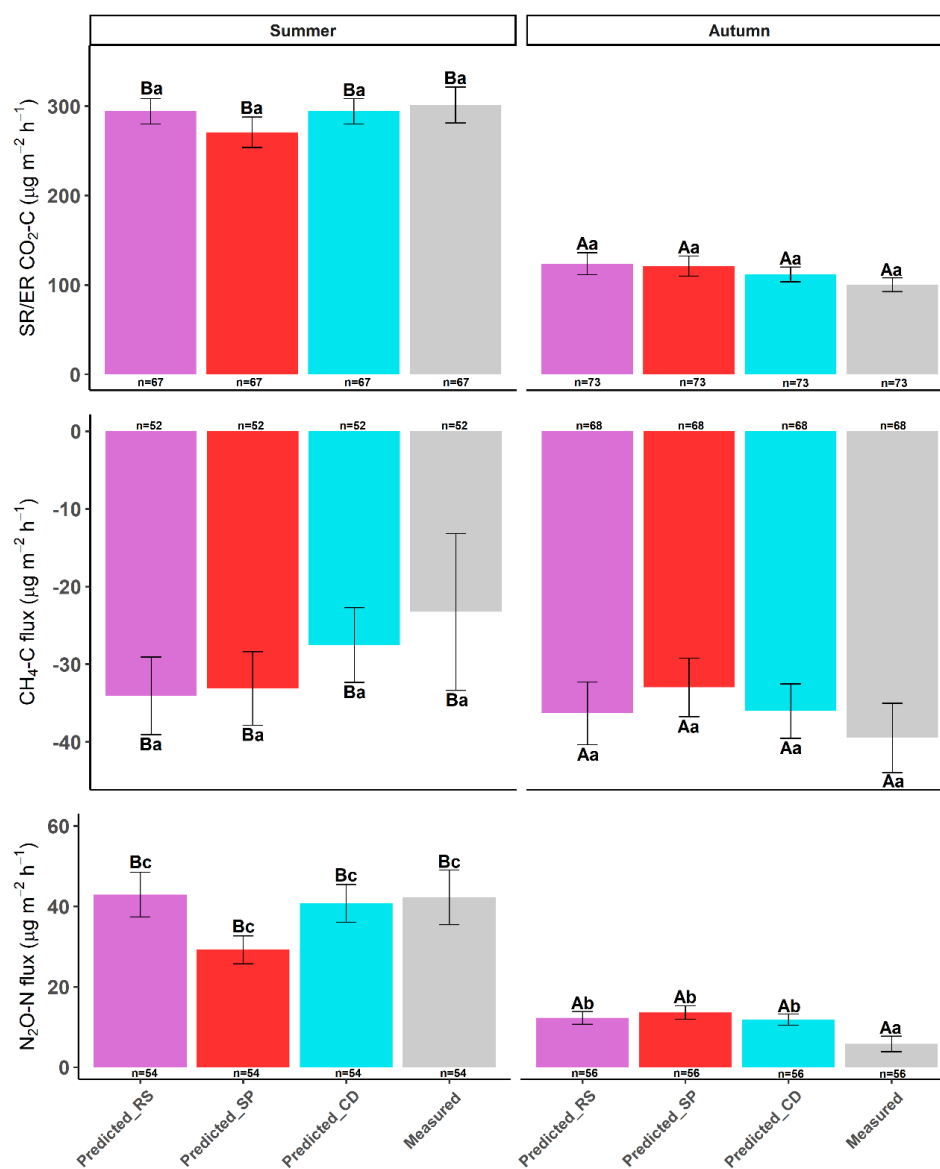

500

501 **Figure A1:** Bar graphs showing the mean fluxes ( $\pm$ SE) predicted using remote sensing (RS), soil properties (SP), and combined  
 502 data (CD) and the measured fluxes at the sampling sites in the 30% model test dataset. The upper-case and lower-case letters indicate  
 503 significant differences ( $p < 0.05$ ) in the mean fluxes in the different seasons and across the measured and predicted fluxes.

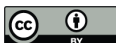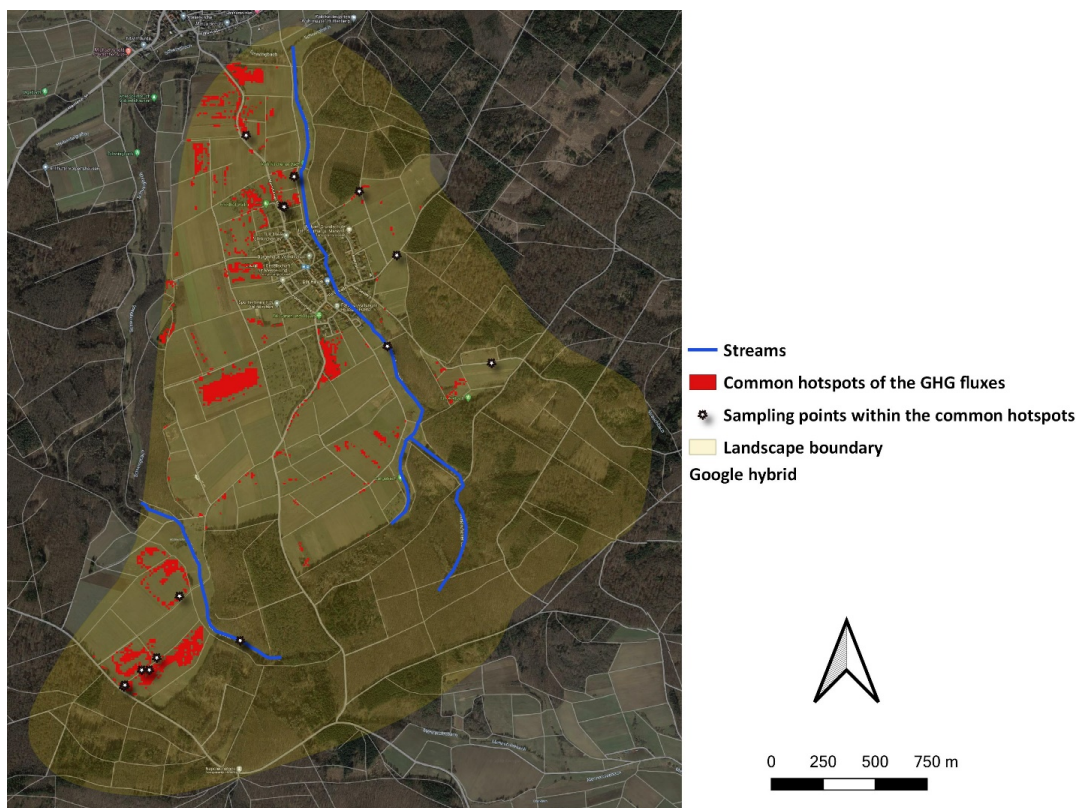

504

505 **Figure A2:** Map showing the common hotspot regions of the three GHG fluxes and the location of the measured sampling points  
506 within these recurrent hotspots (Satellite Image downloaded from © Google Maps).

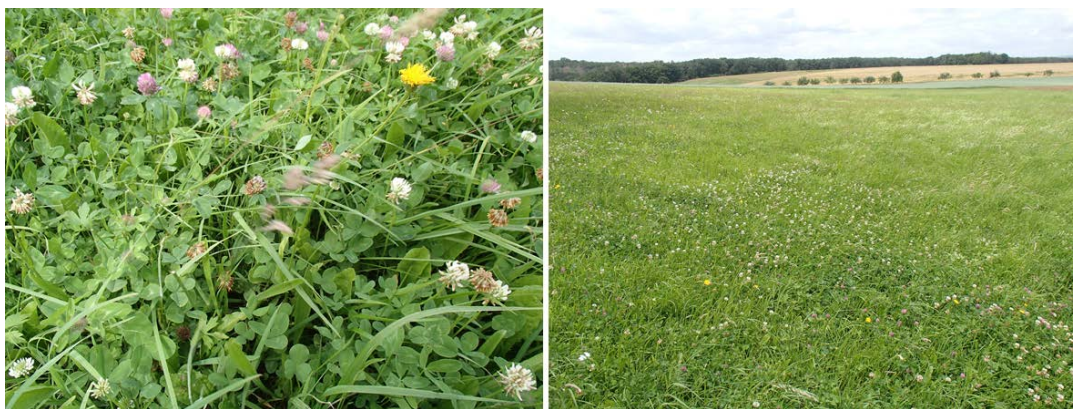

507

508 **Figure A3:** Clover (*Trifolium*) on grassland ecosystems.

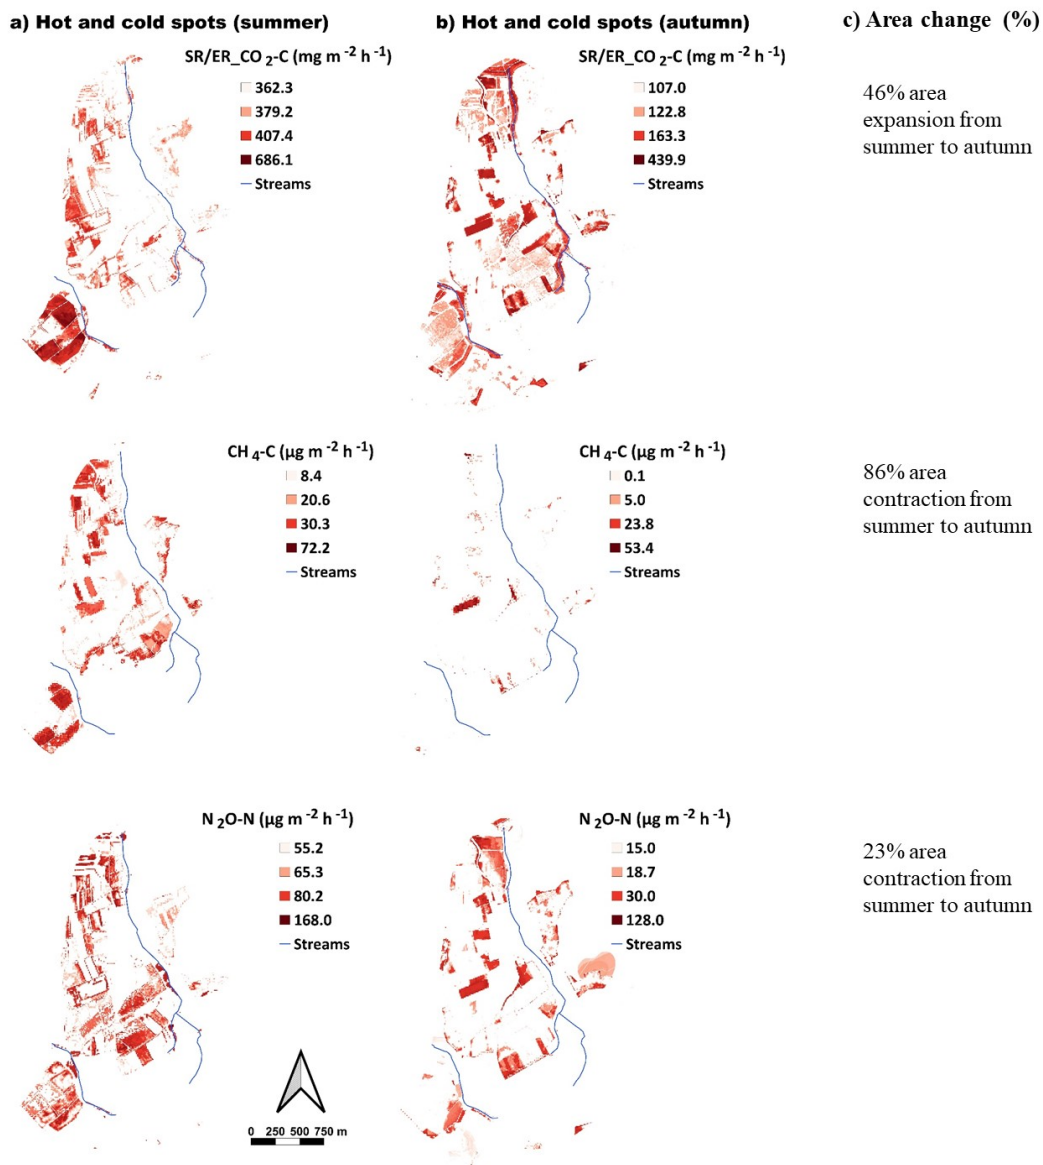

509

510 **Figure A4:** Maps showing the hot and cold spots of the (a) summer and (b) autumn seasons. These regions were defined using each  
 511 season's specific threshold.



512 **Appendix B: Tables**

513 **Table B1 a, b, c:** Cross-validation results of different models developed for SR/ER-CO<sub>2</sub> fluxes in 1a) forest, 1b) grassland and 1c)  
 514 arable land using different predictors in the training dataset. Stepwise elimination of least important predictors was implemented.

| B1a): Forest SR_CO <sub>2</sub> -C flux                                                                                                                              |                                                                                                                          | 10-fold cross validation                                                                                                                                                        |      |                |      |
|----------------------------------------------------------------------------------------------------------------------------------------------------------------------|--------------------------------------------------------------------------------------------------------------------------|---------------------------------------------------------------------------------------------------------------------------------------------------------------------------------|------|----------------|------|
| Category                                                                                                                                                             | Predictor variables                                                                                                      | mtry                                                                                                                                                                            | RMSE | R <sup>2</sup> | MAE  |
| Remote sensing                                                                                                                                                       | Elevation, slope, aspect, TWI, TPI, NDVI, GNDVI, NDMI                                                                    | 2                                                                                                                                                                               | 0.57 | 0.44           | 0.45 |
|                                                                                                                                                                      | Elevation, aspect, TWI, TPI, NDVI, GNDVI, NDMI                                                                           | 2                                                                                                                                                                               | 0.57 | 0.43           | 0.45 |
|                                                                                                                                                                      | Elevation, aspect, TPI, NDVI, GNDVI, NDMI                                                                                | 2                                                                                                                                                                               | 0.57 | 0.44           | 0.44 |
|                                                                                                                                                                      | Elevation, TPI, NDVI, GNDVI, NDMI                                                                                        | 2                                                                                                                                                                               | 0.56 | 0.46           | 0.43 |
|                                                                                                                                                                      | Elevation, NDVI, GNDVI, NDMI                                                                                             | 2                                                                                                                                                                               | 0.55 | 0.48           | 0.43 |
|                                                                                                                                                                      | NDVI, GNDVI, NDMI                                                                                                        | 2                                                                                                                                                                               | 0.56 | 0.45           | 0.44 |
|                                                                                                                                                                      | NDVI, GNDVI                                                                                                              | 2                                                                                                                                                                               | 0.59 | 0.42           | 0.45 |
|                                                                                                                                                                      | NDVI                                                                                                                     | 2                                                                                                                                                                               | 0.63 | 0.36           | 0.49 |
| Site measured soil parameters                                                                                                                                        | Temperature, moisture, pH, bulk density, NO <sub>3</sub> -N, NH <sub>4</sub> -N, DOC, TDN, SOC, SN, CN, sand, silt, clay | 8                                                                                                                                                                               | 0.54 | 0.50           | 0.42 |
|                                                                                                                                                                      | Temperature, moisture, pH, bulk density, NO <sub>3</sub> -N, NH <sub>4</sub> -N, DOC, TDN, SOC, SN, sand, silt, clay     | 7                                                                                                                                                                               | 0.53 | 0.51           | 0.41 |
|                                                                                                                                                                      | Temperature, moisture, pH, bulk density, NO <sub>3</sub> -N, NH <sub>4</sub> -N, DOC, TDN, SOC, SN, sand, silt           | 7                                                                                                                                                                               | 0.53 | 0.51           | 0.41 |
|                                                                                                                                                                      | Temperature, moisture, pH, bulk density, NH <sub>4</sub> -N, DOC, TDN, SOC, SN, sand, silt                               | 6                                                                                                                                                                               | 0.52 | 0.52           | 0.41 |
|                                                                                                                                                                      | Temperature, moisture, pH, bulk density, NH <sub>4</sub> -N, DOC, TDN, SN, sand, silt                                    | 6                                                                                                                                                                               | 0.52 | 0.52           | 0.41 |
|                                                                                                                                                                      | Temperature, moisture, pH, bulk density, NH <sub>4</sub> -N, DOC, TDN, sand, silt                                        | 5                                                                                                                                                                               | 0.53 | 0.52           | 0.41 |
|                                                                                                                                                                      | Moisture, pH, bulk density, NH <sub>4</sub> -N, DOC, TDN, sand, silt                                                     | 5                                                                                                                                                                               | 0.53 | 0.51           | 0.41 |
|                                                                                                                                                                      | Moisture, pH, NH <sub>4</sub> -N, DOC, TDN, sand, silt                                                                   | 4                                                                                                                                                                               | 0.53 | 0.52           | 0.41 |
|                                                                                                                                                                      | Moisture, pH, NH <sub>4</sub> -N, DOC, TDN, silt                                                                         | 2                                                                                                                                                                               | 0.52 | 0.53           | 0.41 |
|                                                                                                                                                                      | Moisture, pH, NH <sub>4</sub> -N, DOC, TDN                                                                               | 2                                                                                                                                                                               | 0.53 | 0.51           | 0.42 |
|                                                                                                                                                                      | Moisture, pH, NH <sub>4</sub> -N, DOC                                                                                    | 2                                                                                                                                                                               | 0.54 | 0.49           | 0.42 |
|                                                                                                                                                                      | Moisture, NH <sub>4</sub> -N, DOC                                                                                        | 2                                                                                                                                                                               | 0.57 | 0.44           | 0.44 |
|                                                                                                                                                                      | Moisture, NH <sub>4</sub> -N                                                                                             | 2                                                                                                                                                                               | 0.57 | 0.44           | 0.45 |
|                                                                                                                                                                      | NH <sub>4</sub> -N                                                                                                       | 2                                                                                                                                                                               | 0.60 | 0.41           | 0.48 |
|                                                                                                                                                                      | Combined                                                                                                                 | Elevation, slope, aspect, TWI, TPI, NDVI, GNDVI, NDMI, temperature, moisture, pH, bulk density, NO <sub>3</sub> -N, NH <sub>4</sub> -N, DOC, TDN, SOC, SN, CN, sand, silt, clay | 12   | 0.51           | 0.54 |
| Slope, aspect, TWI, TPI, NDVI, GNDVI, NDMI, temperature, moisture, pH, bulk density, NO <sub>3</sub> -N, NH <sub>4</sub> -N, DOC, TDN, SOC, SN, CN, sand, silt, clay |                                                                                                                          | 11                                                                                                                                                                              | 0.51 | 0.54           | 0.40 |
| Slope, aspect, TPI, NDVI, GNDVI, NDMI, temperature, moisture, pH, bulk density, NO <sub>3</sub> -N, NH <sub>4</sub> -N, DOC, TDN, SOC, SN, CN, sand, silt, clay      |                                                                                                                          | 11                                                                                                                                                                              | 0.51 | 0.55           | 0.40 |
| Aspect, TPI, NDVI, GNDVI, NDMI, temperature, moisture, pH, bulk density, NO <sub>3</sub> -N, NH <sub>4</sub> -N, DOC, TDN, SOC, SN, CN, sand, silt, clay             |                                                                                                                          | 10                                                                                                                                                                              | 0.51 | 0.55           | 0.40 |
| TPI, NDVI, GNDVI, NDMI, temperature, moisture, pH, bulk density, NO <sub>3</sub> -N, NH <sub>4</sub> -N, DOC, TDN, SOC, SN, CN, sand, silt, clay                     |                                                                                                                          | 10                                                                                                                                                                              | 0.51 | 0.55           | 0.40 |
| TPI, NDVI, GNDVI, NDMI, temperature, moisture, pH, bulk density, NO <sub>3</sub> -N, NH <sub>4</sub> -N, DOC, TDN, SOC, SN, CN, sand, silt                           |                                                                                                                          | 9                                                                                                                                                                               | 0.51 | 0.56           | 0.39 |
| TPI, NDVI, GNDVI, NDMI, temperature, moisture, pH, bulk density, NO <sub>3</sub> -N, NH <sub>4</sub> -N, DOC, TDN, SOC, SN, sand, silt                               |                                                                                                                          | 2                                                                                                                                                                               | 0.50 | 0.58           | 0.39 |
| NDVI, GNDVI, NDMI, temperature, moisture, pH, bulk density, NO <sub>3</sub> -N, NH <sub>4</sub> -N, DOC, TDN, SOC, SN, sand, silt                                    |                                                                                                                          | 8                                                                                                                                                                               | 0.50 | 0.56           | 0.39 |
| NDVI, GNDVI, NDMI, temperature, moisture, pH, bulk density, NH <sub>4</sub> -N, DOC, TDN, SOC, SN, sand, silt                                                        |                                                                                                                          | 2                                                                                                                                                                               | 0.49 | 0.59           | 0.39 |
| NDVI, GNDVI, NDMI, temperature, moisture, pH, bulk density, NH <sub>4</sub> -N, DOC, TDN, SOC, SN, silt                                                              |                                                                                                                          | 2                                                                                                                                                                               | 0.49 | 0.60           | 0.38 |
| NDVI, GNDVI, NDMI, temperature, moisture, pH, NH <sub>4</sub> -N, DOC, TDN, SOC, SN, silt                                                                            |                                                                                                                          | 2                                                                                                                                                                               | 0.49 | 0.60           | 0.38 |
| NDVI, GNDVI, NDMI, temperature, moisture, pH, NH <sub>4</sub> -N, DOC, TDN, SOC, silt                                                                                |                                                                                                                          | 2                                                                                                                                                                               | 0.49 | 0.60           | 0.38 |
| NDVI, GNDVI, NDMI, moisture, pH, NH <sub>4</sub> -N, DOC, TDN, SOC, silt                                                                                             |                                                                                                                          | 2                                                                                                                                                                               | 0.49 | 0.59           | 0.38 |
| NDVI, GNDVI, NDMI, moisture, pH, NH <sub>4</sub> -N, DOC, TDN, silt                                                                                                  |                                                                                                                          | 2                                                                                                                                                                               | 0.49 | 0.59           | 0.39 |
| NDVI, GNDVI, NDMI, moisture, pH, NH <sub>4</sub> -N, DOC, TDN                                                                                                        |                                                                                                                          | 2                                                                                                                                                                               | 0.50 | 0.57           | 0.39 |
| NDVI, GNDVI, NDMI, moisture, NH <sub>4</sub> -N, DOC, TDN                                                                                                            |                                                                                                                          | 2                                                                                                                                                                               | 0.50 | 0.57           | 0.39 |
| NDVI, GNDVI, NDMI, moisture, NH <sub>4</sub> -N, DOC                                                                                                                 |                                                                                                                          | 2                                                                                                                                                                               | 0.50 | 0.57           | 0.39 |
| NDVI, GNDVI, moisture, NH <sub>4</sub> -N, DOC                                                                                                                       |                                                                                                                          | 2                                                                                                                                                                               | 0.51 | 0.55           | 0.40 |
| NDVI, GNDVI, moisture, NH <sub>4</sub> -N                                                                                                                            |                                                                                                                          | 3                                                                                                                                                                               | 0.51 | 0.55           | 0.40 |
| NDVI, moisture, NH <sub>4</sub> -N                                                                                                                                   |                                                                                                                          | 3                                                                                                                                                                               | 0.52 | 0.53           | 0.41 |
| NDVI, NH <sub>4</sub> -N                                                                                                                                             |                                                                                                                          | 2                                                                                                                                                                               | 0.52 | 0.54           | 0.41 |
| NH <sub>4</sub> -N                                                                                                                                                   |                                                                                                                          | 2                                                                                                                                                                               | 0.60 | 0.41           | 0.48 |

515





| B1b): Grassland SR/ER_CO <sub>2</sub> -C flux                                                                                                                              |                                                                                                                          | 10-fold cross validation                                                                                                                                                        |      |                |      |
|----------------------------------------------------------------------------------------------------------------------------------------------------------------------------|--------------------------------------------------------------------------------------------------------------------------|---------------------------------------------------------------------------------------------------------------------------------------------------------------------------------|------|----------------|------|
| Category                                                                                                                                                                   | Predictor variables                                                                                                      | mtry                                                                                                                                                                            | RMSE | R <sup>2</sup> | MAE  |
| Remote sensing                                                                                                                                                             | Elevation, slope, aspect, TWI, TPI, NDVI, GNDVI, NDMI                                                                    | 5                                                                                                                                                                               | 0.62 | 0.47           | 0.48 |
|                                                                                                                                                                            | Elevation, slope, aspect, TPI, NDVI, GNDVI, NDMI                                                                         | 2                                                                                                                                                                               | 0.62 | 0.48           | 0.48 |
|                                                                                                                                                                            | Elevation, aspect, TPI, NDVI, GNDVI, NDMI                                                                                | 2                                                                                                                                                                               | 0.62 | 0.48           | 0.47 |
|                                                                                                                                                                            | Elevation, aspect, NDVI, GNDVI, NDMI                                                                                     | 2                                                                                                                                                                               | 0.61 | 0.49           | 0.47 |
|                                                                                                                                                                            | Elevation, NDVI, GNDVI, NDMI                                                                                             | 2                                                                                                                                                                               | 0.62 | 0.48           | 0.46 |
|                                                                                                                                                                            | NDVI, GNDVI, NDMI                                                                                                        | 2                                                                                                                                                                               | 0.63 | 0.46           | 0.48 |
|                                                                                                                                                                            | NDVI, GNDVI                                                                                                              | 2                                                                                                                                                                               | 0.67 | 0.41           | 0.51 |
|                                                                                                                                                                            | GNDVI                                                                                                                    | 2                                                                                                                                                                               | 0.72 | 0.36           | 0.54 |
| Site measured soil parameters                                                                                                                                              | Temperature, moisture, pH, bulk density, NO <sub>3</sub> -N, NH <sub>4</sub> -N, DOC, TDN, SOC, SN, CN, sand, silt, clay | 8                                                                                                                                                                               | 0.56 | 0.56           | 0.43 |
|                                                                                                                                                                            | Temperature, moisture, pH, bulk density, NO <sub>3</sub> -N, NH <sub>4</sub> -N, DOC, TDN, SOC, SN, CN, sand, clay       | 7                                                                                                                                                                               | 0.56 | 0.57           | 0.43 |
|                                                                                                                                                                            | Temperature, moisture, pH, NO <sub>3</sub> -N, NH <sub>4</sub> -N, DOC, TDN, SOC, SN, CN, sand, clay                     | 7                                                                                                                                                                               | 0.56 | 0.57           | 0.43 |
|                                                                                                                                                                            | Moisture, pH, NO <sub>3</sub> -N, NH <sub>4</sub> -N, DOC, TDN, SOC, SN, CN, sand, clay                                  | 6                                                                                                                                                                               | 0.56 | 0.56           | 0.43 |
|                                                                                                                                                                            | Moisture, pH, NO <sub>3</sub> -N, NH <sub>4</sub> -N, DOC, TDN, SOC, SN, CN, clay                                        | 6                                                                                                                                                                               | 0.56 | 0.57           | 0.43 |
|                                                                                                                                                                            | Moisture, pH, NO <sub>3</sub> -N, NH <sub>4</sub> -N, TDN, SOC, SN, CN, clay                                             | 5                                                                                                                                                                               | 0.56 | 0.57           | 0.42 |
|                                                                                                                                                                            | Moisture, pH, NO <sub>3</sub> -N, NH <sub>4</sub> -N, TDN, SOC, SN, CN                                                   | 5                                                                                                                                                                               | 0.57 | 0.56           | 0.43 |
|                                                                                                                                                                            | Moisture, NO <sub>3</sub> -N, NH <sub>4</sub> -N, TDN, SOC, SN, CN                                                       | 2                                                                                                                                                                               | 0.58 | 0.55           | 0.44 |
|                                                                                                                                                                            | Moisture, NH <sub>4</sub> -N, TDN, SOC, SN, CN                                                                           | 2                                                                                                                                                                               | 0.58 | 0.54           | 0.44 |
|                                                                                                                                                                            | Moisture, NH <sub>4</sub> -N, TDN, SN, CN                                                                                | 2                                                                                                                                                                               | 0.58 | 0.55           | 0.44 |
|                                                                                                                                                                            | Moisture, NH <sub>4</sub> -N, TDN, CN                                                                                    | 2                                                                                                                                                                               | 0.58 | 0.54           | 0.44 |
|                                                                                                                                                                            | Moisture, NH <sub>4</sub> -N, TDN                                                                                        | 2                                                                                                                                                                               | 0.58 | 0.54           | 0.44 |
|                                                                                                                                                                            | Moisture, NH <sub>4</sub> -N                                                                                             | 2                                                                                                                                                                               | 0.61 | 0.51           | 0.47 |
|                                                                                                                                                                            | Moisture                                                                                                                 | 2                                                                                                                                                                               | 0.63 | 0.46           | 0.50 |
|                                                                                                                                                                            | Combined                                                                                                                 | Elevation, slope, aspect, TWI, TPI, NDVI, GNDVI, NDMI, temperature, moisture, pH, bulk density, NO <sub>3</sub> -N, NH <sub>4</sub> -N, DOC, TDN, SOC, SN, CN, sand, silt, clay | 12   | 0.55           | 0.58 |
| Elevation, slope, aspect, TWI, NDVI, GNDVI, NDMI, temperature, moisture, pH, bulk density, NO <sub>3</sub> -N, NH <sub>4</sub> -N, DOC, TDN, SOC, SN, CN, sand, silt, clay |                                                                                                                          | 11                                                                                                                                                                              | 0.55 | 0.59           | 0.41 |
| Elevation, slope, aspect, NDVI, GNDVI, NDMI, temperature, moisture, pH, bulk density, NO <sub>3</sub> -N, NH <sub>4</sub> -N, DOC, TDN, SOC, SN, CN, sand, silt, clay      |                                                                                                                          | 11                                                                                                                                                                              | 0.55 | 0.59           | 0.41 |
| Elevation, aspect, NDVI, GNDVI, NDMI, temperature, moisture, pH, bulk density, NO <sub>3</sub> -N, NH <sub>4</sub> -N, DOC, TDN, SOC, SN, CN, sand, silt, clay             |                                                                                                                          | 10                                                                                                                                                                              | 0.55 | 0.59           | 0.41 |
| Elevation, aspect, NDVI, GNDVI, NDMI, temperature, moisture, pH, bulk density, NO <sub>3</sub> -N, NH <sub>4</sub> -N, DOC, TDN, SOC, SN, CN, sand, clay                   |                                                                                                                          | 10                                                                                                                                                                              | 0.55 | 0.59           | 0.41 |
| Elevation, NDVI, GNDVI, NDMI, temperature, moisture, pH, bulk density, NO <sub>3</sub> -N, NH <sub>4</sub> -N, DOC, TDN, SOC, SN, CN, sand, clay                           |                                                                                                                          | 9                                                                                                                                                                               | 0.55 | 0.59           | 0.40 |
| Elevation, NDVI, GNDVI, NDMI, temperature, moisture, pH, NO <sub>3</sub> -N, NH <sub>4</sub> -N, DOC, TDN, SOC, SN, CN, sand, clay                                         |                                                                                                                          | 9                                                                                                                                                                               | 0.55 | 0.59           | 0.41 |
| Elevation, NDVI, GNDVI, NDMI, moisture, pH, NO <sub>3</sub> -N, NH <sub>4</sub> -N, DOC, TDN, SOC, SN, CN, sand, clay                                                      |                                                                                                                          | 8                                                                                                                                                                               | 0.55 | 0.59           | 0.41 |
| Elevation, NDVI, GNDVI, NDMI, moisture, NO <sub>3</sub> -N, NH <sub>4</sub> -N, DOC, TDN, SOC, SN, CN, sand, clay                                                          |                                                                                                                          | 8                                                                                                                                                                               | 0.55 | 0.59           | 0.41 |
| Elevation, NDVI, GNDVI, NDMI, moisture, NO <sub>3</sub> -N, NH <sub>4</sub> -N, TDN, SOC, SN, CN, sand, clay                                                               |                                                                                                                          | 7                                                                                                                                                                               | 0.55 | 0.59           | 0.41 |
| Elevation, NDVI, GNDVI, NDMI, moisture, NO <sub>3</sub> -N, NH <sub>4</sub> -N, TDN, SOC, SN, CN, clay                                                                     |                                                                                                                          | 7                                                                                                                                                                               | 0.55 | 0.58           | 0.41 |
| Elevation, NDVI, GNDVI, NDMI, moisture, NH <sub>4</sub> -N, TDN, SOC, SN, CN, clay                                                                                         |                                                                                                                          | 6                                                                                                                                                                               | 0.55 | 0.59           | 0.41 |
| Elevation, NDVI, GNDVI, NDMI, moisture, NH <sub>4</sub> -N, TDN, SOC, SN, CN                                                                                               |                                                                                                                          | 2                                                                                                                                                                               | 0.55 | 0.59           | 0.41 |
| NDVI, GNDVI, NDMI, moisture, NH <sub>4</sub> -N, TDN, SOC, SN, CN                                                                                                          |                                                                                                                          | 2                                                                                                                                                                               | 0.56 | 0.58           | 0.42 |
| NDVI, GNDVI, NDMI, moisture, NH <sub>4</sub> -N, TDN, SOC, CN                                                                                                              |                                                                                                                          | 2                                                                                                                                                                               | 0.55 | 0.59           | 0.41 |
| NDVI, GNDVI, NDMI, moisture, NH <sub>4</sub> -N, TDN, CN                                                                                                                   |                                                                                                                          | 2                                                                                                                                                                               | 0.55 | 0.59           | 0.41 |
| NDVI, GNDVI, moisture, NH <sub>4</sub> -N, TDN, CN                                                                                                                         |                                                                                                                          | 2                                                                                                                                                                               | 0.55 | 0.59           | 0.41 |
| NDVI, GNDVI, moisture, NH <sub>4</sub> -N, CN                                                                                                                              |                                                                                                                          | 2                                                                                                                                                                               | 0.55 | 0.58           | 0.42 |
| NDVI, GNDVI, moisture, NH <sub>4</sub> -N                                                                                                                                  |                                                                                                                          | 2                                                                                                                                                                               | 0.55 | 0.59           | 0.42 |
| GNDVI, moisture, NH <sub>4</sub> -N                                                                                                                                        |                                                                                                                          | 2                                                                                                                                                                               | 0.56 | 0.57           | 0.43 |
| GNDVI, moisture                                                                                                                                                            |                                                                                                                          | 2                                                                                                                                                                               | 0.61 | 0.50           | 0.46 |
| Moisture                                                                                                                                                                   |                                                                                                                          | 2                                                                                                                                                                               | 0.63 | 0.46           | 0.50 |



| <b>B1c): Arable SR/ER_CO<sub>2</sub>-C flux</b> |                                                                                                                                                                                 | <b>10-fold cross validation</b> |             |                      |            |
|-------------------------------------------------|---------------------------------------------------------------------------------------------------------------------------------------------------------------------------------|---------------------------------|-------------|----------------------|------------|
| <b>Category</b>                                 | <b>Predictor variables</b>                                                                                                                                                      | <b>mtry</b>                     | <b>RMSE</b> | <b>R<sup>2</sup></b> | <b>MAE</b> |
| Remote sensing                                  | Elevation, slope, aspect, TWI, TPI, NDVI, GNDVI, NDMI                                                                                                                           | 8                               | 0.54        | 0.75                 | 0.44       |
|                                                 | Elevation, slope, aspect, TPI, NDVI, GNDVI, NDMI                                                                                                                                | 7                               | 0.54        | 0.75                 | 0.44       |
|                                                 | Elevation, slope, aspect, NDVI, GNDVI, NDMI                                                                                                                                     | 4                               | 0.54        | 0.75                 | 0.44       |
|                                                 | Elevation, aspect, NDVI, GNDVI, NDMI                                                                                                                                            | 3                               | 0.55        | 0.75                 | 0.44       |
|                                                 | Elevation, NDVI, GNDVI, NDMI                                                                                                                                                    | 2                               | 0.57        | 0.73                 | 0.46       |
|                                                 | NDVI, GNDVI, NDMI                                                                                                                                                               | 2                               | 0.59        | 0.72                 | 0.46       |
|                                                 | NDVI, GNDVI                                                                                                                                                                     | 2                               | 0.60        | 0.71                 | 0.47       |
|                                                 | GNDVI                                                                                                                                                                           | 2                               | 0.60        | 0.71                 | 0.49       |
| Site measured soil parameters                   | Temperature, moisture, pH, bulk density, NO <sub>3</sub> -N, NH <sub>4</sub> -N, DOC, TDN, SOC, SN, CN, sand, silt, clay                                                        | 14                              | 0.69        | 0.59                 | 0.57       |
|                                                 | Temperature, moisture, pH, bulk density, NO <sub>3</sub> -N, NH <sub>4</sub> -N, DOC, SOC, SN, CN, sand, silt, clay                                                             | 13                              | 0.69        | 0.60                 | 0.56       |
|                                                 | Temperature, moisture, pH, NO <sub>3</sub> -N, NH <sub>4</sub> -N, DOC, SOC, SN, CN, sand, silt, clay                                                                           | 12                              | 0.68        | 0.61                 | 0.56       |
|                                                 | Temperature, moisture, pH, NO <sub>3</sub> -N, NH <sub>4</sub> -N, SOC, SN, CN, sand, silt, clay                                                                                | 11                              | 0.67        | 0.61                 | 0.55       |
|                                                 | Temperature, moisture, pH, NH <sub>4</sub> -N, SOC, SN, CN, sand, silt, clay                                                                                                    | 10                              | 0.67        | 0.61                 | 0.56       |
|                                                 | Temperature, moisture, pH, NH <sub>4</sub> -N, SOC, SN, CN, sand, clay                                                                                                          | 9                               | 0.67        | 0.61                 | 0.55       |
|                                                 | Moisture, pH, NH <sub>4</sub> -N, SOC, SN, CN, sand, clay                                                                                                                       | 8                               | 0.67        | 0.62                 | 0.54       |
|                                                 | Moisture, pH, NH <sub>4</sub> -N, SN, CN, sand, clay                                                                                                                            | 7                               | 0.66        | 0.62                 | 0.54       |
|                                                 | Moisture, pH, NH <sub>4</sub> -N, SN, CN, sand                                                                                                                                  | 6                               | 0.66        | 0.62                 | 0.54       |
|                                                 | Moisture, NH <sub>4</sub> -N, SN, CN, sand                                                                                                                                      | 5                               | 0.66        | 0.63                 | 0.53       |
|                                                 | Moisture, SN, CN, sand                                                                                                                                                          | 4                               | 0.66        | 0.63                 | 0.53       |
|                                                 | Moisture, SN, CN                                                                                                                                                                | 3                               | 0.63        | 0.66                 | 0.51       |
|                                                 | Moisture, SN                                                                                                                                                                    | 2                               | 0.66        | 0.63                 | 0.53       |
|                                                 | Moisture                                                                                                                                                                        | 2                               | 0.77        | 0.50                 | 0.64       |
| Combined                                        | Elevation, slope, aspect, TWI, TPI, NDVI, GNDVI, NDMI, temperature, moisture, pH, bulk density, NO <sub>3</sub> -N, NH <sub>4</sub> -N, DOC, TDN, SOC, SN, CN, sand, silt, clay | 12                              | 0.53        | 0.77                 | 0.43       |
|                                                 | Elevation, aspect, TWI, TPI, NDVI, GNDVI, NDMI, temperature, moisture, pH, bulk density, NO <sub>3</sub> -N, NH <sub>4</sub> -N, DOC, TDN, SOC, SN, CN, sand, silt, clay        | 11                              | 0.53        | 0.77                 | 0.43       |
|                                                 | Elevation, aspect, TWI, NDVI, GNDVI, NDMI, temperature, moisture, pH, bulk density, NO <sub>3</sub> -N, NH <sub>4</sub> -N, DOC, TDN, SOC, SN, CN, sand, silt, clay             | 11                              | 0.53        | 0.77                 | 0.43       |
|                                                 | Elevation, aspect, NDVI, GNDVI, NDMI, temperature, moisture, pH, bulk density, NO <sub>3</sub> -N, NH <sub>4</sub> -N, DOC, TDN, SOC, SN, CN, sand, silt, clay                  | 10                              | 0.53        | 0.77                 | 0.43       |
|                                                 | Elevation, aspect, NDVI, GNDVI, NDMI, temperature, moisture, pH, bulk density, NO <sub>3</sub> -N, NH <sub>4</sub> -N, DOC, SOC, SN, CN, sand, silt, clay                       | 10                              | 0.53        | 0.77                 | 0.42       |
|                                                 | Elevation, aspect, NDVI, GNDVI, NDMI, temperature, moisture, pH, NO <sub>3</sub> -N, NH <sub>4</sub> -N, DOC, SOC, SN, CN, sand, silt, clay                                     | 17                              | 0.52        | 0.77                 | 0.42       |
|                                                 | Elevation, aspect, NDVI, GNDVI, NDMI, temperature, moisture, pH, NO <sub>3</sub> -N, NH <sub>4</sub> -N, DOC, SOC, SN, CN, sand, clay                                           | 16                              | 0.52        | 0.77                 | 0.42       |
|                                                 | Elevation, aspect, NDVI, GNDVI, NDMI, temperature, moisture, pH, NO <sub>3</sub> -N, NH <sub>4</sub> -N, DOC, SOC, SN, sand, clay                                               | 8                               | 0.52        | 0.78                 | 0.42       |
|                                                 | Elevation, aspect, NDVI, GNDVI, NDMI, temperature, moisture, pH, NO <sub>3</sub> -N, NH <sub>4</sub> -N, DOC, SOC, SN, sand                                                     | 8                               | 0.52        | 0.78                 | 0.41       |
|                                                 | Elevation, aspect, NDVI, GNDVI, NDMI, temperature, moisture, pH, NH <sub>4</sub> -N, DOC, SOC, SN, sand                                                                         | 7                               | 0.52        | 0.78                 | 0.41       |
|                                                 | Elevation, aspect, NDVI, GNDVI, NDMI, temperature, moisture, pH, NH <sub>4</sub> -N, SOC, SN, sand                                                                              | 7                               | 0.52        | 0.78                 | 0.41       |
|                                                 | Elevation, aspect, NDVI, GNDVI, NDMI, moisture, pH, NH <sub>4</sub> -N, SOC, SN, sand                                                                                           | 6                               | 0.51        | 0.78                 | 0.41       |
|                                                 | Elevation, aspect, NDVI, GNDVI, NDMI, moisture, pH, SOC, SN, sand                                                                                                               | 6                               | 0.51        | 0.78                 | 0.41       |
|                                                 | Elevation, aspect, NDVI, GNDVI, NDMI, moisture, SOC, SN, sand                                                                                                                   | 5                               | 0.51        | 0.78                 | 0.40       |
|                                                 | Elevation, aspect, NDVI, GNDVI, NDMI, moisture, SOC, SN                                                                                                                         | 5                               | 0.51        | 0.79                 | 0.40       |
|                                                 | Elevation, aspect, NDVI, GNDVI, NDMI, moisture, SN                                                                                                                              | 7                               | 0.51        | 0.79                 | 0.40       |
|                                                 | Elevation, aspect, NDVI, GNDVI, moisture, SN                                                                                                                                    | 2                               | 0.49        | 0.80                 | 0.39       |
|                                                 | Elevation, NDVI, GNDVI, moisture, SN                                                                                                                                            | 2                               | 0.51        | 0.79                 | 0.41       |
|                                                 | NDVI, GNDVI, moisture, SN                                                                                                                                                       | 2                               | 0.52        | 0.78                 | 0.41       |
|                                                 | NDVI, GNDVI, moisture                                                                                                                                                           | 2                               | 0.55        | 0.75                 | 0.43       |
|                                                 | NDVI, GNDVI                                                                                                                                                                     | 2                               | 0.60        | 0.71                 | 0.47       |
|                                                 | GNDVI                                                                                                                                                                           | 2                               | 0.60        | 0.71                 | 0.49       |



518 **Table B2 a, b, c:** Cross-validation results of different models developed for all (positive and negative) CH<sub>4</sub> fluxes in 2a) forest, 2b)  
 519 grassland and 2c) arable land using different predictors in the training dataset. Stepwise elimination of least important predictors  
 520 was implemented.

| B2a): Forest CH <sub>4</sub> -C (positive & negative) flux |                                                                                                                                                                                 | 10-fold cross validation |       |                |       |
|------------------------------------------------------------|---------------------------------------------------------------------------------------------------------------------------------------------------------------------------------|--------------------------|-------|----------------|-------|
| Category                                                   | Predictor variables                                                                                                                                                             | mtry                     | RMSE  | R <sup>2</sup> | MAE   |
| Remote sensing                                             | Elevation, slope, aspect, TWI, TPI, NDVI, GNDVI, NDMI                                                                                                                           | 2                        | 45.35 | 0.13           | 36.00 |
|                                                            | Elevation, slope, aspect, TPI, NDVI, GNDVI, NDMI                                                                                                                                | 2                        | 45.26 | 0.13           | 35.97 |
|                                                            | Elevation, aspect, TPI, NDVI, GNDVI, NDMI                                                                                                                                       | 2                        | 45.07 | 0.15           | 35.75 |
|                                                            | Elevation, aspect, NDVI, GNDVI, NDMI                                                                                                                                            | 2                        | 44.63 | 0.15           | 35.00 |
|                                                            | Aspect, NDVI, GNDVI, NDMI                                                                                                                                                       | 2                        | 44.79 | 0.16           | 35.37 |
|                                                            | Aspect, NDVI, GNDVI                                                                                                                                                             | 2                        | 46.38 | 0.14           | 36.15 |
|                                                            | Aspect, NDVI                                                                                                                                                                    | 2                        | 47.90 | 0.12           | 37.92 |
|                                                            | Aspect                                                                                                                                                                          | 2                        | 54.06 | 0.07           | 41.44 |
| Site measured soil parameters                              | Temperature, moisture, pH, bulk density, NO <sub>3</sub> -N, NH <sub>4</sub> -N, DOC, TDN, SOC, SN, CN, sand, silt, clay                                                        | 2                        | 44.79 | 0.16           | 34.46 |
|                                                            | Temperature, moisture, pH, bulk density, NO <sub>3</sub> -N, NH <sub>4</sub> -N, DOC, SOC, SN, CN, sand, silt, clay                                                             | 2                        | 44.65 | 0.16           | 34.36 |
|                                                            | Temperature, moisture, pH, NO <sub>3</sub> -N, NH <sub>4</sub> -N, DOC, SOC, SN, CN, sand, silt, clay                                                                           | 2                        | 44.52 | 0.17           | 34.28 |
|                                                            | Temperature, moisture, pH, NO <sub>3</sub> -N, NH <sub>4</sub> -N, DOC, SOC, SN, CN, sand, silt                                                                                 | 2                        | 44.67 | 0.16           | 34.36 |
|                                                            | Temperature, moisture, pH, NO <sub>3</sub> -N, NH <sub>4</sub> -N, DOC, SOC, CN, sand, silt                                                                                     | 2                        | 44.54 | 0.16           | 34.22 |
|                                                            | Temperature, moisture, pH, NO <sub>3</sub> -N, NH <sub>4</sub> -N, DOC, SOC, sand, silt                                                                                         | 2                        | 43.98 | 0.18           | 33.93 |
|                                                            | Temperature, moisture, pH, NO <sub>3</sub> -N, DOC, SOC, sand, silt                                                                                                             | 2                        | 43.64 | 0.19           | 33.73 |
|                                                            | Temperature, moisture, pH, NO <sub>3</sub> -N, DOC, sand, silt                                                                                                                  | 2                        | 43.46 | 0.19           | 33.49 |
|                                                            | Temperature, moisture, pH, NO <sub>3</sub> -N, sand, silt                                                                                                                       | 2                        | 43.07 | 0.20           | 33.20 |
|                                                            | Temperature, moisture, pH, NO <sub>3</sub> -N, silt                                                                                                                             | 2                        | 44.29 | 0.16           | 33.87 |
|                                                            | Temperature, moisture, pH, NO <sub>3</sub> -N                                                                                                                                   | 2                        | 45.84 | 0.14           | 35.18 |
|                                                            | Temperature, moisture, NO <sub>3</sub> -N                                                                                                                                       | 2                        | 45.31 | 0.15           | 35.40 |
|                                                            | Moisture, NO <sub>3</sub> -N                                                                                                                                                    | 2                        | 47.94 | 0.12           | 36.80 |
|                                                            | Moisture                                                                                                                                                                        | 2                        | 51.25 | 0.08           | 40.58 |
| Combined                                                   | Elevation, slope, aspect, TWI, TPI, NDVI, GNDVI, NDMI, temperature, moisture, pH, bulk density, NO <sub>3</sub> -N, NH <sub>4</sub> -N, DOC, TDN, SOC, SN, CN, sand, silt, clay | 2                        | 44.31 | 0.17           | 34.18 |
|                                                            | Elevation, slope, aspect, TWI, TPI, NDVI, GNDVI, NDMI, temperature, moisture, pH, bulk density, NO <sub>3</sub> -N, NH <sub>4</sub> -N, DOC, TDN, SOC, CN, sand, silt, clay     | 2                        | 44.37 | 0.17           | 34.29 |
|                                                            | Elevation, aspect, TWI, TPI, NDVI, GNDVI, NDMI, temperature, moisture, pH, bulk density, NO <sub>3</sub> -N, NH <sub>4</sub> -N, DOC, TDN, SOC, CN, sand, silt, clay            | 2                        | 44.23 | 0.18           | 34.15 |
|                                                            | Elevation, aspect, TPI, NDVI, GNDVI, NDMI, temperature, moisture, pH, bulk density, NO <sub>3</sub> -N, NH <sub>4</sub> -N, DOC, TDN, SOC, CN, sand, silt, clay                 | 2                        | 44.05 | 0.19           | 34.05 |
|                                                            | Elevation, aspect, NDVI, GNDVI, NDMI, temperature, moisture, pH, bulk density, NO <sub>3</sub> -N, NH <sub>4</sub> -N, DOC, TDN, SOC, CN, sand, silt, clay                      | 2                        | 43.90 | 0.19           | 33.99 |
|                                                            | Elevation, aspect, NDVI, GNDVI, NDMI, temperature, moisture, pH, NO <sub>3</sub> -N, NH <sub>4</sub> -N, DOC, TDN, SOC, CN, sand, silt, clay                                    | 2                        | 43.80 | 0.19           | 33.88 |
|                                                            | Elevation, aspect, NDVI, GNDVI, NDMI, temperature, moisture, pH, NO <sub>3</sub> -N, NH <sub>4</sub> -N, DOC, SOC, CN, sand, silt, clay                                         | 2                        | 43.60 | 0.20           | 33.74 |
|                                                            | Elevation, aspect, NDVI, GNDVI, NDMI, temperature, moisture, pH, NO <sub>3</sub> -N, NH <sub>4</sub> -N, DOC, SOC, CN, sand, silt                                               | 2                        | 43.64 | 0.20           | 33.88 |
|                                                            | Elevation, aspect, NDVI, GNDVI, temperature, moisture, pH, NO <sub>3</sub> -N, NH <sub>4</sub> -N, DOC, SOC, CN, sand, silt                                                     | 2                        | 43.51 | 0.20           | 33.78 |
|                                                            | Aspect, NDVI, GNDVI, temperature, moisture, pH, NO <sub>3</sub> -N, NH <sub>4</sub> -N, DOC, SOC, CN, sand, silt                                                                | 2                        | 43.48 | 0.20           | 33.79 |
|                                                            | Aspect, NDVI, GNDVI, temperature, moisture, pH, NO <sub>3</sub> -N, DOC, SOC, CN, sand, silt                                                                                    | 2                        | 43.03 | 0.22           | 33.48 |
|                                                            | Aspect, NDVI, GNDVI, temperature, moisture, pH, NO <sub>3</sub> -N, DOC, CN, sand, silt                                                                                         | 2                        | 42.76 | 0.22           | 33.17 |
|                                                            | Aspect, NDVI, GNDVI, temperature, moisture, pH, NO <sub>3</sub> -N, DOC, CN, silt                                                                                               | 2                        | 43.24 | 0.20           | 33.49 |
|                                                            | Aspect, NDVI, GNDVI, temperature, moisture, pH, NO <sub>3</sub> -N, DOC                                                                                                         | 2                        | 42.81 | 0.21           | 33.41 |
|                                                            | Aspect, NDVI, GNDVI, temperature, moisture, pH, NO <sub>3</sub> -N, silt                                                                                                        | 2                        | 42.49 | 0.23           | 33.30 |
|                                                            | Aspect, GNDVI, temperature, moisture, pH, NO <sub>3</sub> -N, silt                                                                                                              | 2                        | 42.71 | 0.22           | 33.42 |
|                                                            | Aspect, temperature, moisture, pH, NO <sub>3</sub> -N, silt                                                                                                                     | 2                        | 43.29 | 0.20           | 33.83 |
|                                                            | Aspect, temperature, moisture, pH, NO <sub>3</sub> -N                                                                                                                           | 2                        | 43.92 | 0.19           | 34.69 |
|                                                            | Aspect, temperature, moisture, NO <sub>3</sub> -N                                                                                                                               | 2                        | 43.50 | 0.21           | 34.58 |
|                                                            | Temperature, moisture, NO <sub>3</sub> -N                                                                                                                                       | 2                        | 45.31 | 0.15           | 35.40 |
|                                                            | Moisture, NO <sub>3</sub> -N                                                                                                                                                    | 2                        | 47.94 | 0.12           | 36.80 |
|                                                            | Moisture                                                                                                                                                                        | 2                        | 51.25 | 0.08           | 40.58 |

521





| B2b): Grassland CH <sub>4</sub> -C (positive & negative) flux |                                                                                                                                                                                 | 10-fold cross validation |       |                |       |
|---------------------------------------------------------------|---------------------------------------------------------------------------------------------------------------------------------------------------------------------------------|--------------------------|-------|----------------|-------|
| Category                                                      | Predictor variables                                                                                                                                                             | mtry                     | RMSE  | R <sup>2</sup> | MAE   |
| Remote sensing                                                | Elevation, slope, aspect, TWI, TPI, NDVI, GNDVI, NDMI                                                                                                                           | 2                        | 28.88 | 0.15           | 20.98 |
|                                                               | Elevation, slope, aspect, TPI, NDVI, GNDVI, NDMI                                                                                                                                | 2                        | 28.73 | 0.16           | 20.97 |
|                                                               | Elevation, aspect, TPI, NDVI, GNDVI, NDMI                                                                                                                                       | 2                        | 29.19 | 0.15           | 21.54 |
|                                                               | Elevation, TPI, NDVI, GNDVI, NDMI                                                                                                                                               | 2                        | 28.85 | 0.14           | 21.56 |
|                                                               | Elevation, TPI, NDVI, NDMI                                                                                                                                                      | 2                        | 29.23 | 0.15           | 21.53 |
|                                                               | Elevation, TPI, NDMI                                                                                                                                                            | 2                        | 30.08 | 0.14           | 22.04 |
|                                                               | Elevation, NDMI                                                                                                                                                                 | 2                        | 30.46 | 0.13           | 22.57 |
|                                                               | Elevation                                                                                                                                                                       | 2                        | 30.72 | 0.13           | 22.84 |
| Site measured soil parameters                                 | Temperature, moisture, pH, bulk density, NO <sub>3</sub> -N, NH <sub>4</sub> -N, DOC, TDN, SOC, SN, CN, sand, silt, clay                                                        | 2                        | 26.98 | 0.22           | 19.52 |
|                                                               | Temperature, moisture, pH, bulk density, NO <sub>3</sub> -N, NH <sub>4</sub> -N, DOC, TDN, SOC, SN, CN, silt, clay                                                              | 7                        | 26.96 | 0.22           | 19.42 |
|                                                               | Temperature, moisture, pH, bulk density, NO <sub>3</sub> -N, NH <sub>4</sub> -N, DOC, TDN, SN, CN, silt, clay                                                                   | 7                        | 26.86 | 0.23           | 19.38 |
|                                                               | Temperature, moisture, pH, bulk density, NO <sub>3</sub> -N, NH <sub>4</sub> -N, DOC, TDN, SN, CN, clay                                                                         | 6                        | 26.66 | 0.23           | 19.20 |
|                                                               | Temperature, moisture, pH, bulk density, NO <sub>3</sub> -N, NH <sub>4</sub> -N, DOC, TDN, CN, clay                                                                             | 6                        | 26.68 | 0.23           | 19.28 |
|                                                               | Temperature, moisture, pH, NO <sub>3</sub> -N, NH <sub>4</sub> -N, DOC, TDN, CN, clay                                                                                           | 5                        | 26.60 | 0.24           | 19.16 |
|                                                               | Temperature, moisture, pH, NO <sub>3</sub> -N, DOC, TDN, CN, clay                                                                                                               | 2                        | 26.27 | 0.25           | 19.00 |
|                                                               | Moisture, pH, NO <sub>3</sub> -N, DOC, TDN, CN, clay                                                                                                                            | 2                        | 26.16 | 0.26           | 19.01 |
|                                                               | Moisture, pH, NO <sub>3</sub> -N, DOC, CN, clay                                                                                                                                 | 2                        | 25.59 | 0.29           | 18.62 |
|                                                               | Moisture, pH, NO <sub>3</sub> -N, DOC, CN                                                                                                                                       | 2                        | 26.27 | 0.25           | 19.58 |
|                                                               | Moisture, pH, DOC, CN                                                                                                                                                           | 2                        | 26.81 | 0.23           | 19.51 |
|                                                               | Moisture, DOC, CN                                                                                                                                                               | 2                        | 26.96 | 0.24           | 20.19 |
|                                                               | Moisture, CN                                                                                                                                                                    | 2                        | 28.73 | 0.23           | 21.43 |
|                                                               | Moisture                                                                                                                                                                        | 2                        | 30.95 | 0.14           | 23.49 |
| Combined                                                      | Elevation, slope, aspect, TWI, TPI, NDVI, GNDVI, NDMI, temperature, moisture, pH, bulk density, NO <sub>3</sub> -N, NH <sub>4</sub> -N, DOC, TDN, SOC, SN, CN, sand, silt, clay | 12                       | 26.91 | 0.22           | 19.51 |
|                                                               | Elevation, slope, TWI, TPI, NDVI, GNDVI, NDMI, temperature, moisture, pH, bulk density, NO <sub>3</sub> -N, NH <sub>4</sub> -N, DOC, TDN, SOC, SN, CN, sand, silt, clay         | 2                        | 26.89 | 0.22           | 19.42 |
|                                                               | Elevation, slope, TWI, TPI, NDVI, GNDVI, NDMI, temperature, moisture, pH, bulk density, NO <sub>3</sub> -N, NH <sub>4</sub> -N, DOC, TDN, SOC, SN, CN, sand, clay               | 2                        | 26.74 | 0.23           | 19.36 |
|                                                               | Elevation, slope, TWI, TPI, NDVI, GNDVI, NDMI, temperature, moisture, pH, bulk density, NO <sub>3</sub> -N, NH <sub>4</sub> -N, DOC, TDN, SN, CN, sand, clay                    | 10                       | 26.71 | 0.23           | 19.30 |
|                                                               | Elevation, slope, TWI, TPI, NDVI, NDMI, temperature, moisture, pH, bulk density, NO <sub>3</sub> -N, NH <sub>4</sub> -N, DOC, TDN, SN, CN, sand, clay                           | 2                        | 26.56 | 0.24           | 19.22 |
|                                                               | Elevation, TWI, TPI, NDVI, NDMI, temperature, moisture, pH, bulk density, NO <sub>3</sub> -N, NH <sub>4</sub> -N, DOC, TDN, SN, CN, sand, clay                                  | 2                        | 26.68 | 0.23           | 19.39 |
|                                                               | Elevation, TPI, NDVI, NDMI, temperature, moisture, pH, bulk density, NO <sub>3</sub> -N, NH <sub>4</sub> -N, DOC, TDN, SN, CN, sand, clay                                       | 2                        | 26.75 | 0.22           | 19.36 |
|                                                               | Elevation, TPI, NDVI, NDMI, temperature, moisture, pH, bulk density, NO <sub>3</sub> -N, NH <sub>4</sub> -N, DOC, TDN, SN, CN, clay                                             | 2                        | 26.62 | 0.23           | 19.29 |
|                                                               | Elevation, TPI, NDVI, NDMI, temperature, moisture, pH, bulk density, NO <sub>3</sub> -N, NH <sub>4</sub> -N, DOC, TDN, CN, clay                                                 | 2                        | 26.77 | 0.22           | 19.35 |
|                                                               | Elevation, TPI, NDVI, NDMI, temperature, moisture, pH, NO <sub>3</sub> -N, NH <sub>4</sub> -N, DOC, TDN, CN, clay                                                               | 2                        | 26.65 | 0.23           | 19.27 |
|                                                               | Elevation, TPI, NDVI, NDMI, moisture, pH, NO <sub>3</sub> -N, NH <sub>4</sub> -N, DOC, TDN, CN, clay                                                                            | 2                        | 26.69 | 0.22           | 19.39 |
|                                                               | Elevation, TPI, NDVI, NDMI, moisture, pH, NO <sub>3</sub> -N, DOC, TDN, CN, clay                                                                                                | 2                        | 26.45 | 0.24           | 19.29 |
|                                                               | Elevation, TPI, NDMI, moisture, pH, NO <sub>3</sub> -N, DOC, TDN, CN, clay                                                                                                      | 2                        | 26.30 | 0.24           | 19.14 |
|                                                               | TPI, NDMI, moisture, pH, NO <sub>3</sub> -N, DOC, TDN, CN, clay                                                                                                                 | 2                        | 26.33 | 0.25           | 19.16 |
|                                                               | TPI, NDMI, moisture, pH, NO <sub>3</sub> -N, DOC, CN, clay                                                                                                                      | 2                        | 25.91 | 0.27           | 18.85 |
|                                                               | TPI, NDMI, moisture, pH, NO <sub>3</sub> -N, CN, clay                                                                                                                           | 2                        | 25.83 | 0.27           | 18.62 |
|                                                               | TPI, moisture, pH, NO <sub>3</sub> -N, CN, clay                                                                                                                                 | 2                        | 25.32 | 0.31           | 18.18 |
|                                                               | Moisture, pH, NO <sub>3</sub> -N, CN, clay                                                                                                                                      | 2                        | 25.38 | 0.30           | 18.29 |
|                                                               | Moisture, pH, NO <sub>3</sub> -N                                                                                                                                                | 2                        | 26.65 | 0.25           | 19.61 |
|                                                               | Moisture, pH, NO <sub>3</sub> -N                                                                                                                                                | 2                        | 27.60 | 0.19           | 20.52 |
|                                                               | Moisture, pH                                                                                                                                                                    | 2                        | 29.67 | 0.14           | 22.56 |
|                                                               | Moisture                                                                                                                                                                        | 2                        | 30.95 | 0.14           | 23.49 |



| B2c): Arable CH <sub>4</sub> -C (positive & negative) flux                          |                                                                                                                                                                                 | 10-fold cross validation |       |                |       |
|-------------------------------------------------------------------------------------|---------------------------------------------------------------------------------------------------------------------------------------------------------------------------------|--------------------------|-------|----------------|-------|
| Category                                                                            | Predictor variables                                                                                                                                                             | mtry                     | RMSE  | R <sup>2</sup> | MAE   |
| Remote sensing                                                                      | Elevation, slope, aspect, TWI, TPI, NDVI, GNDVI, NDMI                                                                                                                           | 2                        | 48.58 | 0.28           | 33.46 |
|                                                                                     | Elevation, slope, aspect, TWI, NDVI, GNDVI, NDMI                                                                                                                                | 2                        | 48.10 | 0.28           | 33.16 |
| Site measured soil parameters                                                       | Elevation, slope, aspect, NDVI, GNDVI, NDMI                                                                                                                                     | 2                        | 48.79 | 0.29           | 33.46 |
|                                                                                     | Elevation, aspect, NDVI, GNDVI, NDMI                                                                                                                                            | 2                        | 49.56 | 0.29           | 33.54 |
|                                                                                     | Aspect, NDVI, GNDVI, NDMI                                                                                                                                                       | 2                        | 47.59 | 0.25           | 32.46 |
|                                                                                     | Aspect, GNDVI, NDMI                                                                                                                                                             | 2                        | 48.56 | 0.26           | 33.18 |
|                                                                                     | GNDVI, NDMI                                                                                                                                                                     | 2                        | 50.79 | 0.35           | 34.72 |
|                                                                                     | NDMI                                                                                                                                                                            | 2                        | 52.71 | 0.30           | 36.62 |
|                                                                                     | Temperature, moisture, pH, bulk density, NO <sub>3</sub> -N, NH <sub>4</sub> -N, DOC, TDN, SOC, SN, CN, sand, silt, clay                                                        | 2                        | 45.46 | 0.24           | 32.35 |
|                                                                                     | Temperature, moisture, pH, bulk density, NO <sub>3</sub> -N, NH <sub>4</sub> -N, DOC, TDN, SOC, SN, CN, silt, clay                                                              | 2                        | 45.74 | 0.22           | 32.67 |
|                                                                                     | Temperature, moisture, pH, bulk density, NO <sub>3</sub> -N, DOC, TDN, SOC, SN, CN, silt, clay                                                                                  | 2                        | 45.73 | 0.21           | 32.67 |
|                                                                                     | Temperature, moisture, pH, bulk density, NO <sub>3</sub> -N, DOC, TDN, SOC, SN, CN, clay                                                                                        | 2                        | 45.79 | 0.21           | 32.53 |
| Temperature, moisture, pH, bulk density, NO <sub>3</sub> -N, DOC, SOC, SN, CN, clay | 2                                                                                                                                                                               | 46.74                    | 0.21  | 33.25          |       |
| Temperature, pH, bulk density, NO <sub>3</sub> -N, DOC, SOC, SN, CN, clay           | 2                                                                                                                                                                               | 46.81                    | 0.21  | 33.69          |       |
| pH, bulk density, NO <sub>3</sub> -N, DOC, SOC, SN, CN, clay                        | 2                                                                                                                                                                               | 46.64                    | 0.23  | 33.38          |       |
| pH, bulk density, NO <sub>3</sub> -N, DOC, SOC, CN, clay                            | 2                                                                                                                                                                               | 45.99                    | 0.23  | 33.22          |       |
| Bulk density, NO <sub>3</sub> -N, DOC, SOC, CN, clay                                | 2                                                                                                                                                                               | 45.03                    | 0.27  | 31.97          |       |
| Bulk density, NO <sub>3</sub> -N, DOC, SOC, CN                                      | 2                                                                                                                                                                               | 44.43                    | 0.28  | 32.08          |       |
| Bulk density, NO <sub>3</sub> -N, DOC, CN                                           | 2                                                                                                                                                                               | 44.16                    | 0.25  | 31.82          |       |
| NO <sub>3</sub> -N, DOC, CN                                                         | 2                                                                                                                                                                               | 43.73                    | 0.30  | 31.45          |       |
| DOC, CN                                                                             | 2                                                                                                                                                                               | 44.51                    | 0.29  | 32.65          |       |
| CN                                                                                  | 2                                                                                                                                                                               | 45.77                    | 0.28  | 34.09          |       |
| Combined                                                                            | Elevation, slope, aspect, TWI, TPI, NDVI, GNDVI, NDMI, temperature, moisture, pH, bulk density, NO <sub>3</sub> -N, NH <sub>4</sub> -N, DOC, TDN, SOC, SN, CN, sand, silt, clay | 2                        | 46.85 | 0.23           | 33.13 |
|                                                                                     | Elevation, slope, aspect, TWI, TPI, NDVI, GNDVI, NDMI, temperature, moisture, pH, bulk density, NO <sub>3</sub> -N, DOC, TDN, SOC, SN, CN, sand, silt, clay                     | 2                        | 46.91 | 0.21           | 33.19 |
|                                                                                     | Elevation, slope, aspect, TWI, NDVI, GNDVI, NDMI, temperature, moisture, pH, bulk density, NO <sub>3</sub> -N, DOC, TDN, SOC, SN, CN, sand, silt, clay                          | 2                        | 46.60 | 0.22           | 32.99 |
|                                                                                     | Elevation, slope, aspect, NDVI, GNDVI, NDMI, temperature, moisture, pH, bulk density, NO <sub>3</sub> -N, DOC, TDN, SOC, SN, CN, sand, silt, clay                               | 2                        | 46.83 | 0.22           | 33.03 |
|                                                                                     | Elevation, slope, aspect, NDVI, GNDVI, NDMI, temperature, moisture, pH, bulk density, NO <sub>3</sub> -N, DOC, TDN, SOC, SN, CN, sand, clay                                     | 2                        | 46.87 | 0.23           | 33.01 |
|                                                                                     | Elevation, slope, aspect, NDVI, GNDVI, NDMI, temperature, moisture, pH, bulk density, NO <sub>3</sub> -N, DOC, TDN, SOC, SN, CN, clay                                           | 2                        | 47.11 | 0.25           | 33.25 |
|                                                                                     | Elevation, aspect, NDVI, GNDVI, NDMI, temperature, moisture, pH, bulk density, NO <sub>3</sub> -N, DOC, TDN, SOC, SN, CN, clay                                                  | 2                        | 46.86 | 0.23           | 32.89 |
|                                                                                     | Elevation, aspect, NDVI, GNDVI, NDMI, temperature, moisture, pH, bulk density, NO <sub>3</sub> -N, DOC, SOC, SN, CN, clay                                                       | 2                        | 47.79 | 0.26           | 33.60 |
|                                                                                     | Elevation, aspect, NDVI, GNDVI, NDMI, temperature, moisture, pH, bulk density, NO <sub>3</sub> -N, DOC, SOC, CN, clay                                                           | 2                        | 47.86 | 0.25           | 33.69 |
|                                                                                     | Elevation, aspect, NDVI, GNDVI, NDMI, moisture, pH, bulk density, NO <sub>3</sub> -N, DOC, SOC, CN, clay                                                                        | 2                        | 47.62 | 0.25           | 33.38 |
|                                                                                     | Elevation, aspect, NDVI, GNDVI, NDMI, pH, bulk density, NO <sub>3</sub> -N, DOC, SOC, CN, clay                                                                                  | 2                        | 47.28 | 0.24           | 33.32 |
|                                                                                     | Elevation, aspect, NDVI, GNDVI, NDMI, pH, bulk density, NO <sub>3</sub> -N, DOC, SOC, CN                                                                                        | 2                        | 46.41 | 0.22           | 32.75 |
|                                                                                     | Elevation, aspect, NDVI, GNDVI, NDMI, pH, NO <sub>3</sub> -N, DOC, SOC, CN                                                                                                      | 2                        | 46.44 | 0.22           | 32.65 |
|                                                                                     | Elevation, aspect, NDVI, GNDVI, NDMI, pH, NO <sub>3</sub> -N, DOC, CN                                                                                                           | 2                        | 46.67 | 0.23           | 32.67 |
|                                                                                     | Elevation, aspect, GNDVI, NDMI, pH, NO <sub>3</sub> -N, DOC, CN                                                                                                                 | 2                        | 46.47 | 0.23           | 32.76 |
|                                                                                     | Elevation, aspect, GNDVI, NDMI, pH, NO <sub>3</sub> -N, CN                                                                                                                      | 2                        | 47.43 | 0.25           | 33.18 |
|                                                                                     | Elevation, aspect, GNDVI, NDMI, pH, CN                                                                                                                                          | 2                        | 47.10 | 0.25           | 32.74 |
|                                                                                     | Elevation, aspect, GNDVI, NDMI, CN                                                                                                                                              | 3                        | 47.49 | 0.26           | 32.67 |
|                                                                                     | Aspect, GNDVI, NDMI, CN                                                                                                                                                         | 2                        | 46.05 | 0.23           | 31.87 |
|                                                                                     | GNDVI, NDMI, CN                                                                                                                                                                 | 2                        | 47.59 | 0.31           | 33.30 |
|                                                                                     | NDMI, CN                                                                                                                                                                        | 2                        | 47.29 | 0.24           | 33.50 |
|                                                                                     | CN                                                                                                                                                                              | 2                        | 45.77 | 0.28           | 34.09 |



524 **Table B3 a, b, c:** Cross-validation results of different models developed for all (positive and negative) N<sub>2</sub>O fluxes in 3a) forest, 3b)  
 525 grassland and 3c) arable land using different predictors in the training dataset. Stepwise elimination of least important predictors  
 526 was implemented.

| B3a): Forest N <sub>2</sub> O-N (positive & negative) flux |                                                                                                                                                                                 | 10-fold cross validation |      |                |      |
|------------------------------------------------------------|---------------------------------------------------------------------------------------------------------------------------------------------------------------------------------|--------------------------|------|----------------|------|
| Category                                                   | Predictor variables                                                                                                                                                             | mtry                     | RMSE | R <sup>2</sup> | MAE  |
| Remote sensing                                             | Elevation, slope, aspect, TWI, TPI, NDVI, GNDVI, NDMI                                                                                                                           | 2                        | 0.43 | 0.11           | 0.30 |
|                                                            | Elevation, aspect, TWI, TPI, NDVI, GNDVI, NDMI                                                                                                                                  | 2                        | 0.42 | 0.11           | 0.30 |
|                                                            | Elevation, aspect, TPI, NDVI, GNDVI, NDMI                                                                                                                                       | 2                        | 0.42 | 0.11           | 0.30 |
|                                                            | Elevation, aspect, NDVI, GNDVI, NDMI                                                                                                                                            | 2                        | 0.43 | 0.09           | 0.31 |
|                                                            | Aspect, NDVI, GNDVI, NDMI                                                                                                                                                       | 2                        | 0.44 | 0.12           | 0.33 |
|                                                            | NDVI, GNDVI, NDMI                                                                                                                                                               | 2                        | 0.43 | 0.13           | 0.32 |
|                                                            | NDVI, GNDVI                                                                                                                                                                     | 2                        | 0.45 | 0.11           | 0.33 |
|                                                            | GNDVI                                                                                                                                                                           | 2                        | 0.46 | 0.12           | 0.34 |
| Site measured soil parameters                              | Temperature, moisture, pH, bulk density, NO <sub>3</sub> -N, NH <sub>4</sub> -N, DOC, TDN, SOC, SN, CN, sand, silt, clay                                                        | 2                        | 0.41 | 0.12           | 0.29 |
|                                                            | Temperature, moisture, bulk density, NO <sub>3</sub> -N, NH <sub>4</sub> -N, DOC, TDN, SOC, SN, CN, sand, silt, clay                                                            | 2                        | 0.41 | 0.12           | 0.29 |
|                                                            | Temperature, moisture, bulk density, NO <sub>3</sub> -N, NH <sub>4</sub> -N, DOC, TDN, SOC, SN, CN, sand, silt                                                                  | 2                        | 0.41 | 0.13           | 0.29 |
|                                                            | Temperature, moisture, bulk density, NO <sub>3</sub> -N, NH <sub>4</sub> -N, DOC, TDN, SOC, SN, CN, silt                                                                        | 2                        | 0.41 | 0.14           | 0.29 |
|                                                            | Temperature, moisture, NO <sub>3</sub> -N, NH <sub>4</sub> -N, DOC, TDN, SOC, SN, CN, silt                                                                                      | 2                        | 0.41 | 0.13           | 0.29 |
|                                                            | Temperature, moisture, NO <sub>3</sub> -N, NH <sub>4</sub> -N, DOC, TDN, SOC, SN, silt                                                                                          | 2                        | 0.41 | 0.12           | 0.29 |
|                                                            | Temperature, moisture, NO <sub>3</sub> -N, NH <sub>4</sub> -N, DOC, TDN, SN, silt                                                                                               | 2                        | 0.41 | 0.13           | 0.29 |
|                                                            | Temperature, moisture, NO <sub>3</sub> -N, NH <sub>4</sub> -N, TDN, SN, silt                                                                                                    | 2                        | 0.41 | 0.15           | 0.29 |
|                                                            | Temperature, moisture, NO <sub>3</sub> -N, NH <sub>4</sub> -N, TDN, SN                                                                                                          | 2                        | 0.41 | 0.15           | 0.29 |
|                                                            | Temperature, moisture, NO <sub>3</sub> -N, NH <sub>4</sub> -N, TDN                                                                                                              | 2                        | 0.42 | 0.15           | 0.30 |
|                                                            | Temperature, moisture, NO <sub>3</sub> -N, NH <sub>4</sub> -N                                                                                                                   | 2                        | 0.42 | 0.13           | 0.30 |
|                                                            | Moisture, NO <sub>3</sub> -N, NH <sub>4</sub> -N                                                                                                                                | 2                        | 0.42 | 0.15           | 0.30 |
|                                                            | Moisture, NO <sub>3</sub> -N                                                                                                                                                    | 2                        | 0.45 | 0.11           | 0.33 |
|                                                            | NO <sub>3</sub> -N                                                                                                                                                              | 2                        | 0.48 | 0.11           | 0.34 |
| Combined                                                   | Elevation, slope, aspect, TWI, TPI, NDVI, GNDVI, NDMI, temperature, moisture, pH, bulk density, NO <sub>3</sub> -N, NH <sub>4</sub> -N, DOC, TDN, SOC, SN, CN, sand, silt, clay | 2                        | 0.41 | 0.11           | 0.28 |
|                                                            | Elevation, slope, aspect, TWI, TPI, NDVI, GNDVI, NDMI, temperature, moisture, bulk density, NO <sub>3</sub> -N, NH <sub>4</sub> -N, DOC, TDN, SOC, SN, CN, sand, silt, clay     | 2                        | 0.41 | 0.13           | 0.28 |
|                                                            | Elevation, aspect, TWI, TPI, NDVI, GNDVI, NDMI, temperature, moisture, bulk density, NO <sub>3</sub> -N, NH <sub>4</sub> -N, DOC, TDN, SOC, SN, CN, sand, silt, clay            | 2                        | 0.41 | 0.12           | 0.28 |
|                                                            | Elevation, aspect, TPI, NDVI, GNDVI, NDMI, temperature, moisture, bulk density, NO <sub>3</sub> -N, NH <sub>4</sub> -N, DOC, TDN, SOC, SN, CN, sand, silt, clay                 | 2                        | 0.41 | 0.12           | 0.28 |
|                                                            | Elevation, aspect, NDVI, GNDVI, NDMI, temperature, moisture, bulk density, NO <sub>3</sub> -N, NH <sub>4</sub> -N, DOC, TDN, SOC, SN, CN, sand, silt, clay                      | 2                        | 0.41 | 0.12           | 0.29 |
|                                                            | Elevation, aspect, NDVI, GNDVI, NDMI, temperature, moisture, bulk density, NO <sub>3</sub> -N, NH <sub>4</sub> -N, DOC, TDN, SOC, SN, CN, sand, silt                            | 2                        | 0.41 | 0.12           | 0.29 |
|                                                            | Elevation, aspect, NDVI, GNDVI, NDMI, temperature, moisture, bulk density, NO <sub>3</sub> -N, NH <sub>4</sub> -N, DOC, TDN, SOC, SN, CN, silt                                  | 2                        | 0.41 | 0.13           | 0.29 |
|                                                            | Elevation, aspect, NDVI, GNDVI, NDMI, temperature, moisture, NO <sub>3</sub> -N, NH <sub>4</sub> -N, DOC, TDN, SOC, SN, CN, silt                                                | 2                        | 0.41 | 0.12           | 0.29 |
|                                                            | Elevation, aspect, NDVI, GNDVI, temperature, moisture, NO <sub>3</sub> -N, NH <sub>4</sub> -N, DOC, TDN, SOC, SN, CN, silt                                                      | 2                        | 0.41 | 0.13           | 0.29 |
|                                                            | Elevation, aspect, GNDVI, temperature, moisture, NO <sub>3</sub> -N, NH <sub>4</sub> -N, DOC, TDN, SOC, SN, CN, silt                                                            | 2                        | 0.41 | 0.13           | 0.28 |
|                                                            | Elevation, aspect, temperature, moisture, NO <sub>3</sub> -N, NH <sub>4</sub> -N, DOC, TDN, SOC, SN, CN, silt                                                                   | 2                        | 0.41 | 0.13           | 0.28 |
|                                                            | Aspect, temperature, moisture, NO <sub>3</sub> -N, NH <sub>4</sub> -N, DOC, TDN, SOC, SN, CN, silt                                                                              | 2                        | 0.41 | 0.13           | 0.29 |
|                                                            | Aspect, temperature, moisture, NO <sub>3</sub> -N, NH <sub>4</sub> -N, DOC, TDN, SN, CN, silt                                                                                   | 2                        | 0.41 | 0.13           | 0.28 |
|                                                            | Aspect, temperature, moisture, NO <sub>3</sub> -N, NH <sub>4</sub> -N, DOC, TDN, SN, CN                                                                                         | 2                        | 0.41 | 0.14           | 0.29 |
|                                                            | Aspect, temperature, moisture, NO <sub>3</sub> -N, NH <sub>4</sub> -N, DOC, TDN, SN                                                                                             | 2                        | 0.41 | 0.15           | 0.29 |
|                                                            | Aspect, temperature, moisture, NO <sub>3</sub> -N, NH <sub>4</sub> -N, TDN, SN                                                                                                  | 2                        | 0.41 | 0.16           | 0.29 |
|                                                            | Aspect, temperature, moisture, NO <sub>3</sub> -N, NH <sub>4</sub> -N, TDN                                                                                                      | 2                        | 0.42 | 0.16           | 0.29 |
|                                                            | Temperature, moisture, NO <sub>3</sub> -N, NH <sub>4</sub> -N, TDN                                                                                                              | 2                        | 0.42 | 0.15           | 0.30 |
|                                                            | Temperature, moisture, NO <sub>3</sub> -N, NH <sub>4</sub> -N                                                                                                                   | 2                        | 0.42 | 0.13           | 0.30 |
|                                                            | Moisture, NO <sub>3</sub> -N, NH <sub>4</sub> -N                                                                                                                                | 2                        | 0.42 | 0.15           | 0.30 |
|                                                            | Moisture, NO <sub>3</sub> -N                                                                                                                                                    | 2                        | 0.45 | 0.11           | 0.33 |
|                                                            | NO <sub>3</sub> -N                                                                                                                                                              | 2                        | 0.48 | 0.11           | 0.34 |

527



| B3b): Grassland N <sub>2</sub> O-N (positive & negative) flux |                                                                                                                                                                                 | 10-fold cross validation |      |                |      |
|---------------------------------------------------------------|---------------------------------------------------------------------------------------------------------------------------------------------------------------------------------|--------------------------|------|----------------|------|
| Category                                                      | Predictor variables                                                                                                                                                             | mtry                     | RMSE | R <sup>2</sup> | MAE  |
| Remote sensing                                                | Elevation, slope, aspect, TWI, TPI, NDVI, GNDVI, NDMI                                                                                                                           | 2                        | 0.73 | 0.13           | 0.53 |
|                                                               | Elevation, slope, aspect, TPI, NDVI, GNDVI, NDMI                                                                                                                                | 2                        | 0.73 | 0.13           | 0.53 |
|                                                               | Elevation, aspect, TPI, NDVI, GNDVI, NDMI                                                                                                                                       | 2                        | 0.74 | 0.12           | 0.55 |
|                                                               | Elevation, aspect, NDVI, GNDVI, NDMI                                                                                                                                            | 2                        | 0.74 | 0.14           | 0.54 |
|                                                               | Elevation, NDVI, GNDVI, NDMI                                                                                                                                                    | 2                        | 0.74 | 0.14           | 0.55 |
|                                                               | NDVI, GNDVI, NDMI                                                                                                                                                               | 2                        | 0.76 | 0.13           | 0.55 |
|                                                               | NDVI, NDMI                                                                                                                                                                      | 2                        | 0.75 | 0.11           | 0.57 |
|                                                               | NDVI                                                                                                                                                                            | 2                        | 0.78 | 0.11           | 0.61 |
| Site measured soil parameters                                 | Temperature, moisture, pH, bulk density, NO <sub>3</sub> -N, NH <sub>4</sub> -N, DOC, TDN, SOC, SN, CN, sand, silt, clay                                                        | 2                        | 0.72 | 0.12           | 0.50 |
|                                                               | Temperature, moisture, pH, NO <sub>3</sub> -N, NH <sub>4</sub> -N, DOC, TDN, SOC, SN, CN, sand, silt, clay                                                                      | 2                        | 0.72 | 0.12           | 0.50 |
|                                                               | Temperature, moisture, pH, NO <sub>3</sub> -N, NH <sub>4</sub> -N, DOC, TDN, SOC, SN, CN, sand, clay                                                                            | 2                        | 0.71 | 0.15           | 0.49 |
|                                                               | Temperature, moisture, pH, NO <sub>3</sub> -N, NH <sub>4</sub> -N, DOC, TDN, SOC, SN, CN, clay                                                                                  | 2                        | 0.71 | 0.15           | 0.48 |
|                                                               | Temperature, moisture, pH, NO <sub>3</sub> -N, NH <sub>4</sub> -N, TDN, SOC, SN, CN, clay                                                                                       | 2                        | 0.71 | 0.16           | 0.49 |
|                                                               | Temperature, moisture, pH, NO <sub>3</sub> -N, NH <sub>4</sub> -N, SOC, SN, CN, clay                                                                                            | 2                        | 0.71 | 0.15           | 0.49 |
|                                                               | Temperature, moisture, pH, NH <sub>4</sub> -N, SOC, SN, CN, clay                                                                                                                | 2                        | 0.71 | 0.16           | 0.49 |
|                                                               | Temperature, moisture, pH, NH <sub>4</sub> -N, SOC, CN, clay                                                                                                                    | 2                        | 0.69 | 0.19           | 0.48 |
|                                                               | Temperature, moisture, NH <sub>4</sub> -N, SOC, CN, clay                                                                                                                        | 2                        | 0.70 | 0.19           | 0.49 |
|                                                               | Moisture, NH <sub>4</sub> -N, SOC, CN, clay                                                                                                                                     | 2                        | 0.70 | 0.18           | 0.50 |
|                                                               | Moisture, NH <sub>4</sub> -N, CN, clay                                                                                                                                          | 2                        | 0.68 | 0.22           | 0.49 |
|                                                               | Moisture, NH <sub>4</sub> -N, clay                                                                                                                                              | 2                        | 0.70 | 0.21           | 0.52 |
|                                                               | Moisture, clay                                                                                                                                                                  | 2                        | 0.73 | 0.22           | 0.54 |
|                                                               | Moisture                                                                                                                                                                        | 2                        | 0.71 | 0.22           | 0.53 |
| Combined                                                      | Elevation, slope, aspect, TWI, TPI, NDVI, GNDVI, NDMI, temperature, moisture, pH, bulk density, NO <sub>3</sub> -N, NH <sub>4</sub> -N, DOC, TDN, SOC, SN, CN, sand, silt, clay | 2                        | 0.71 | 0.14           | 0.49 |
|                                                               | Elevation, slope, aspect, TWI, NDVI, GNDVI, NDMI, temperature, moisture, pH, bulk density, NO <sub>3</sub> -N, NH <sub>4</sub> -N, DOC, TDN, SOC, SN, CN, sand, silt, clay      | 2                        | 0.71 | 0.16           | 0.49 |
|                                                               | Elevation, aspect, TWI, NDVI, GNDVI, NDMI, temperature, moisture, pH, bulk density, NO <sub>3</sub> -N, NH <sub>4</sub> -N, DOC, TDN, SOC, SN, CN, sand, silt, clay             | 2                        | 0.71 | 0.16           | 0.49 |
|                                                               | Elevation, aspect, NDVI, GNDVI, NDMI, temperature, moisture, pH, bulk density, NO <sub>3</sub> -N, NH <sub>4</sub> -N, DOC, TDN, SOC, SN, CN, sand, silt, clay                  | 2                        | 0.71 | 0.15           | 0.49 |
|                                                               | Elevation, aspect, NDVI, GNDVI, NDMI, temperature, moisture, pH, NO <sub>3</sub> -N, NH <sub>4</sub> -N, DOC, TDN, SOC, SN, CN, sand, silt, clay                                | 2                        | 0.71 | 0.15           | 0.49 |
|                                                               | Elevation, NDVI, GNDVI, NDMI, temperature, moisture, pH, NO <sub>3</sub> -N, NH <sub>4</sub> -N, DOC, TDN, SOC, SN, CN, sand, silt, clay                                        | 2                        | 0.71 | 0.16           | 0.49 |
|                                                               | Elevation, NDVI, GNDVI, NDMI, temperature, moisture, pH, NO <sub>3</sub> -N, NH <sub>4</sub> -N, DOC, TDN, SOC, SN, CN, silt, clay                                              | 2                        | 0.70 | 0.17           | 0.48 |
|                                                               | Elevation, NDVI, GNDVI, NDMI, temperature, moisture, pH, NO <sub>3</sub> -N, NH <sub>4</sub> -N, DOC, TDN, SOC, SN, CN, clay                                                    | 2                        | 0.69 | 0.19           | 0.47 |
|                                                               | NDVI, GNDVI, NDMI, temperature, moisture, pH, NO <sub>3</sub> -N, NH <sub>4</sub> -N, DOC, TDN, SOC, SN, CN, clay                                                               | 2                        | 0.70 | 0.17           | 0.48 |
|                                                               | NDVI, GNDVI, NDMI, temperature, moisture, pH, NO <sub>3</sub> -N, NH <sub>4</sub> -N, TDN, SOC, SN, CN, clay                                                                    | 2                        | 0.70 | 0.17           | 0.48 |
|                                                               | NDVI, GNDVI, NDMI, temperature, moisture, pH, NH <sub>4</sub> -N, TDN, SOC, SN, CN, clay                                                                                        | 2                        | 0.70 | 0.18           | 0.48 |
|                                                               | NDVI, GNDVI, NDMI, temperature, moisture, pH, NH <sub>4</sub> -N, SOC, SN, CN, clay                                                                                             | 2                        | 0.70 | 0.19           | 0.49 |
|                                                               | NDVI, GNDVI, NDMI, temperature, moisture, NH <sub>4</sub> -N, SOC, SN, CN, clay                                                                                                 | 2                        | 0.70 | 0.18           | 0.49 |
|                                                               | NDVI, GNDVI, NDMI, moisture, NH <sub>4</sub> -N, SOC, SN, CN, clay                                                                                                              | 2                        | 0.70 | 0.19           | 0.48 |
|                                                               | NDVI, GNDVI, NDMI, moisture, NH <sub>4</sub> -N, SOC, CN, clay                                                                                                                  | 2                        | 0.69 | 0.20           | 0.48 |
|                                                               | NDVI, GNDVI, NDMI, moisture, SOC, CN, clay                                                                                                                                      | 2                        | 0.69 | 0.20           | 0.48 |
|                                                               | NDVI, NDMI, moisture, SOC, CN, clay                                                                                                                                             | 2                        | 0.68 | 0.21           | 0.48 |
|                                                               | NDVI, NDMI, moisture, CN, clay                                                                                                                                                  | 2                        | 0.68 | 0.23           | 0.48 |
|                                                               | NDVI, moisture, CN, clay                                                                                                                                                        | 3                        | 0.67 | 0.26           | 0.48 |
|                                                               | NDVI, moisture, clay                                                                                                                                                            | 2                        | 0.71 | 0.24           | 0.52 |
|                                                               | NDVI, moisture                                                                                                                                                                  | 2                        | 0.67 | 0.25           | 0.49 |
|                                                               | NDVI                                                                                                                                                                            | 2                        | 0.78 | 0.11           | 0.61 |



| B3c): Arable N <sub>2</sub> O-N (positive & negative) flux |                                                                                                                                                                                 | 10-fold cross validation |      |                |      |
|------------------------------------------------------------|---------------------------------------------------------------------------------------------------------------------------------------------------------------------------------|--------------------------|------|----------------|------|
| Category                                                   | Predictor variables                                                                                                                                                             | mtry                     | RMSE | R <sup>2</sup> | MAE  |
| Remote sensing                                             | Elevation, slope, aspect, TWI, TPI, NDVI, GNDVI, NDMI                                                                                                                           | 5                        | 0.49 | 0.56           | 0.39 |
|                                                            | Elevation, slope, aspect, TWI, NDVI, GNDVI, NDMI                                                                                                                                | 2                        | 0.48 | 0.58           | 0.38 |
|                                                            | Elevation, aspect, TWI, NDVI, GNDVI, NDMI                                                                                                                                       | 2                        | 0.48 | 0.58           | 0.37 |
|                                                            | Elevation, aspect, NDVI, GNDVI, NDMI                                                                                                                                            | 2                        | 0.48 | 0.58           | 0.38 |
|                                                            | Elevation, NDVI, GNDVI, NDMI                                                                                                                                                    | 4                        | 0.49 | 0.57           | 0.38 |
|                                                            | Elevation, GNDVI, NDMI                                                                                                                                                          | 2                        | 0.49 | 0.57           | 0.39 |
|                                                            | GNDVI, NDMI                                                                                                                                                                     | 2                        | 0.52 | 0.53           | 0.41 |
|                                                            | GNDVI                                                                                                                                                                           | 2                        | 0.58 | 0.45           | 0.45 |
| Site measured soil parameters                              | Temperature, moisture, pH, bulk density, NO <sub>3</sub> -N, NH <sub>4</sub> -N, DOC, TDN, SOC, SN, CN, sand, silt, clay                                                        | 8                        | 0.55 | 0.44           | 0.44 |
|                                                            | Temperature, moisture, pH, NO <sub>3</sub> -N, NH <sub>4</sub> -N, DOC, TDN, SOC, SN, CN, sand, silt, clay                                                                      | 13                       | 0.54 | 0.46           | 0.43 |
|                                                            | Temperature, moisture, pH, NO <sub>3</sub> -N, NH <sub>4</sub> -N, DOC, SOC, SN, CN, sand, silt, clay                                                                           | 12                       | 0.54 | 0.46           | 0.43 |
|                                                            | Moisture, pH, NO <sub>3</sub> -N, NH <sub>4</sub> -N, DOC, SOC, SN, CN, sand, silt, clay                                                                                        | 11                       | 0.53 | 0.48           | 0.42 |
|                                                            | Moisture, pH, NO <sub>3</sub> -N, NH <sub>4</sub> -N, DOC, SOC, SN, CN, sand, silt                                                                                              | 10                       | 0.53 | 0.47           | 0.43 |
|                                                            | Moisture, pH, NO <sub>3</sub> -N, DOC, SOC, SN, CN, sand, silt                                                                                                                  | 9                        | 0.53 | 0.47           | 0.43 |
|                                                            | Moisture, NO <sub>3</sub> -N, DOC, SOC, SN, CN, sand, silt                                                                                                                      | 8                        | 0.54 | 0.46           | 0.43 |
|                                                            | Moisture, NO <sub>3</sub> -N, SOC, SN, CN, sand, silt                                                                                                                           | 7                        | 0.54 | 0.47           | 0.43 |
|                                                            | Moisture, NO <sub>3</sub> -N, SN, CN, sand, silt                                                                                                                                | 6                        | 0.53 | 0.48           | 0.42 |
|                                                            | Moisture, NO <sub>3</sub> -N, SN, CN, sand                                                                                                                                      | 2                        | 0.54 | 0.47           | 0.43 |
|                                                            | Moisture, NO <sub>3</sub> -N, SN, CN                                                                                                                                            | 2                        | 0.54 | 0.46           | 0.42 |
|                                                            | Moisture, SN, CN                                                                                                                                                                | 2                        | 0.57 | 0.41           | 0.45 |
|                                                            | Moisture, SN                                                                                                                                                                    | 2                        | 0.58 | 0.41           | 0.45 |
|                                                            | Moisture                                                                                                                                                                        | 2                        | 0.63 | 0.33           | 0.50 |
| Combined                                                   | Elevation, slope, aspect, TWI, TPI, NDVI, GNDVI, NDMI, temperature, moisture, pH, bulk density, NO <sub>3</sub> -N, NH <sub>4</sub> -N, DOC, TDN, SOC, SN, CN, sand, silt, clay | 12                       | 0.48 | 0.57           | 0.37 |
|                                                            | Elevation, aspect, TWI, TPI, NDVI, GNDVI, NDMI, temperature, moisture, pH, bulk density, NO <sub>3</sub> -N, NH <sub>4</sub> -N, DOC, TDN, SOC, SN, CN, sand, silt, clay        | 11                       | 0.48 | 0.57           | 0.37 |
|                                                            | Elevation, aspect, TWI, TPI, NDVI, GNDVI, NDMI, temperature, moisture, pH, bulk density, NO <sub>3</sub> -N, NH <sub>4</sub> -N, DOC, TDN, SOC, SN, CN, sand, silt              | 11                       | 0.48 | 0.57           | 0.38 |
|                                                            | Elevation, aspect, TWI, NDVI, GNDVI, NDMI, temperature, moisture, pH, bulk density, NO <sub>3</sub> -N, NH <sub>4</sub> -N, DOC, TDN, SOC, SN, CN, sand, silt                   | 10                       | 0.48 | 0.57           | 0.37 |
|                                                            | Elevation, aspect, NDVI, GNDVI, NDMI, temperature, moisture, pH, bulk density, NO <sub>3</sub> -N, NH <sub>4</sub> -N, DOC, TDN, SOC, SN, CN, sand, silt                        | 10                       | 0.48 | 0.57           | 0.38 |
|                                                            | Elevation, aspect, NDVI, GNDVI, NDMI, temperature, moisture, pH, NO <sub>3</sub> -N, NH <sub>4</sub> -N, DOC, TDN, SOC, SN, CN, sand, silt                                      | 9                        | 0.48 | 0.57           | 0.38 |
|                                                            | Elevation, aspect, NDVI, GNDVI, NDMI, temperature, moisture, pH, NO <sub>3</sub> -N, NH <sub>4</sub> -N, DOC, TDN, SOC, SN, CN                                                  | 9                        | 0.48 | 0.57           | 0.38 |
|                                                            | Elevation, aspect, NDVI, GNDVI, NDMI, temperature, moisture, pH, NO <sub>3</sub> -N, NH <sub>4</sub> -N, DOC, TDN, SOC, SN, CN                                                  | 2                        | 0.49 | 0.57           | 0.38 |
|                                                            | Elevation, NDVI, GNDVI, NDMI, temperature, moisture, pH, NO <sub>3</sub> -N, NH <sub>4</sub> -N, DOC, TDN, SOC, SN, CN                                                          | 8                        | 0.48 | 0.57           | 0.38 |
|                                                            | Elevation, NDVI, GNDVI, NDMI, moisture, pH, NO <sub>3</sub> -N, NH <sub>4</sub> -N, DOC, TDN, SOC, SN, CN                                                                       | 7                        | 0.48 | 0.57           | 0.38 |
|                                                            | NDVI, GNDVI, NDMI, moisture, pH, NO <sub>3</sub> -N, NH <sub>4</sub> -N, DOC, TDN, SOC, SN, CN                                                                                  | 7                        | 0.48 | 0.57           | 0.38 |
|                                                            | NDVI, GNDVI, NDMI, moisture, NO <sub>3</sub> -N, NH <sub>4</sub> -N, DOC, TDN, SOC, SN, CN                                                                                      | 6                        | 0.48 | 0.57           | 0.38 |
|                                                            | NDVI, GNDVI, NDMI, moisture, NO <sub>3</sub> -N, DOC, TDN, SOC, SN, CN                                                                                                          | 6                        | 0.49 | 0.56           | 0.38 |
|                                                            | NDVI, GNDVI, NDMI, moisture, NO <sub>3</sub> -N, TDN, SOC, SN, CN                                                                                                               | 2                        | 0.48 | 0.57           | 0.38 |
|                                                            | NDVI, GNDVI, NDMI, moisture, TDN, SOC, SN, CN                                                                                                                                   | 2                        | 0.49 | 0.56           | 0.38 |
|                                                            | NDVI, GNDVI, NDMI, moisture, TDN, SOC, SN                                                                                                                                       | 2                        | 0.49 | 0.55           | 0.38 |
|                                                            | NDVI, GNDVI, NDMI, moisture, TDN, SN                                                                                                                                            | 2                        | 0.48 | 0.57           | 0.38 |
|                                                            | NDVI, GNDVI, NDMI, moisture, SN                                                                                                                                                 | 2                        | 0.50 | 0.54           | 0.40 |
|                                                            | NDVI, GNDVI, NDMI, moisture                                                                                                                                                     | 2                        | 0.49 | 0.56           | 0.39 |
|                                                            | GNDVI, NDMI, moisture                                                                                                                                                           | 2                        | 0.52 | 0.52           | 0.41 |
|                                                            | GNDVI, NDMI                                                                                                                                                                     | 2                        | 0.52 | 0.53           | 0.41 |
|                                                            | GNDVI                                                                                                                                                                           | 2                        | 0.58 | 0.45           | 0.45 |



530 **Table B4 a, b, c:** Cross-validation results of different models developed for negative CH<sub>4</sub> fluxes in 4a) forest, 4b) grassland and  
 531 4c) arable land using different predictors in the training dataset. Stepwise elimination of least important predictors was implemented.

| B4a): Forest CH <sub>4</sub> -C negative fluxes only |                                                                                                                                                                                 | 10-fold cross validation |       |                |       |
|------------------------------------------------------|---------------------------------------------------------------------------------------------------------------------------------------------------------------------------------|--------------------------|-------|----------------|-------|
| Category                                             | Predictor variables                                                                                                                                                             | mtry                     | RMSE  | R <sup>2</sup> | MAE   |
| Remote sensing                                       | Elevation, slope, aspect, TWI, TPI, NDVI, GNDVI, NDMI                                                                                                                           | 8                        | 39.38 | 0.21           | 32.51 |
|                                                      | Elevation, slope, aspect, TPI, NDVI, GNDVI, NDMI                                                                                                                                | 2                        | 39.45 | 0.20           | 32.64 |
|                                                      | Elevation, aspect, TPI, NDVI, GNDVI, NDMI                                                                                                                                       | 2                        | 39.11 | 0.20           | 32.45 |
|                                                      | Elevation, aspect, NDVI, GNDVI, NDMI                                                                                                                                            | 5                        | 39.53 | 0.20           | 32.43 |
|                                                      | Elevation, aspect, NDVI, NDMI                                                                                                                                                   | 4                        | 39.76 | 0.20           | 32.57 |
|                                                      | Elevation, aspect, NDVI                                                                                                                                                         | 3                        | 40.42 | 0.19           | 32.69 |
|                                                      | Aspect, NDVI                                                                                                                                                                    | 2                        | 41.52 | 0.17           | 33.61 |
|                                                      | Aspect                                                                                                                                                                          | 2                        | 46.08 | 0.09           | 35.89 |
| Site measured soil parameters                        | Temperature, moisture, pH, bulk density, NO <sub>3</sub> -N, NH <sub>4</sub> -N, DOC, TDN, SOC, SN, CN, sand, silt, clay                                                        | 2                        | 40.59 | 0.14           | 32.82 |
|                                                      | Temperature, moisture, pH, bulk density, NO <sub>3</sub> -N, NH <sub>4</sub> -N, DOC, TDN, SOC, SN, sand, silt, clay                                                            | 2                        | 40.17 | 0.16           | 32.57 |
|                                                      | Temperature, moisture, pH, NO <sub>3</sub> -N, NH <sub>4</sub> -N, DOC, TDN, SOC, SN, sand, silt, clay                                                                          | 2                        | 40.09 | 0.17           | 32.52 |
|                                                      | Moisture, pH, NO <sub>3</sub> -N, NH <sub>4</sub> -N, DOC, TDN, SOC, SN, sand, silt, clay                                                                                       | 2                        | 40.16 | 0.16           | 32.68 |
|                                                      | Moisture, pH, NO <sub>3</sub> -N, NH <sub>4</sub> -N, DOC, TDN, SOC, SN, sand, silt                                                                                             | 2                        | 40.22 | 0.16           | 32.65 |
|                                                      | Moisture, pH, NO <sub>3</sub> -N, NH <sub>4</sub> -N, DOC, TDN, SOC, SN, sand                                                                                                   | 5                        | 40.66 | 0.16           | 32.59 |
|                                                      | Moisture, pH, NO <sub>3</sub> -N, NH <sub>4</sub> -N, DOC, SOC, SN, sand                                                                                                        | 2                        | 40.33 | 0.16           | 32.35 |
|                                                      | Moisture, pH, NO <sub>3</sub> -N, DOC, SOC, SN, sand                                                                                                                            | 2                        | 40.02 | 0.17           | 32.19 |
|                                                      | Moisture, pH, NO <sub>3</sub> -N, SOC, SN, sand                                                                                                                                 | 2                        | 40.21 | 0.17           | 32.05 |
|                                                      | Moisture, pH, NO <sub>3</sub> -N, SOC, sand                                                                                                                                     | 2                        | 40.01 | 0.18           | 31.78 |
|                                                      | Moisture, pH, NO <sub>3</sub> -N, SOC                                                                                                                                           | 2                        | 41.27 | 0.14           | 32.39 |
|                                                      | Moisture, pH, NO <sub>3</sub> -N                                                                                                                                                | 2                        | 41.67 | 0.15           | 32.38 |
|                                                      | pH, NO <sub>3</sub> -N                                                                                                                                                          | 2                        | 43.94 | 0.12           | 34.03 |
|                                                      | NO <sub>3</sub> -N                                                                                                                                                              | 2                        | 47.96 | 0.10           | 37.11 |
| Combined                                             | Elevation, slope, aspect, TWI, TPI, NDVI, GNDVI, NDMI, temperature, moisture, pH, bulk density, NO <sub>3</sub> -N, NH <sub>4</sub> -N, DOC, TDN, SOC, SN, CN, sand, silt, clay | 12                       | 39.66 | 0.19           | 32.09 |
|                                                      | Elevation, aspect, TWI, TPI, NDVI, GNDVI, NDMI, temperature, moisture, pH, bulk density, NO <sub>3</sub> -N, NH <sub>4</sub> -N, DOC, TDN, SOC, SN, CN, sand, silt, clay        | 11                       | 39.59 | 0.20           | 32.09 |
|                                                      | Elevation, aspect, TWI, TPI, NDVI, GNDVI, NDMI, temperature, moisture, pH, bulk density, NO <sub>3</sub> -N, NH <sub>4</sub> -N, DOC, TDN, SOC, SN, sand, silt, clay            | 20                       | 39.49 | 0.20           | 31.90 |
|                                                      | Elevation, aspect, TPI, NDVI, GNDVI, NDMI, temperature, moisture, pH, bulk density, NO <sub>3</sub> -N, NH <sub>4</sub> -N, DOC, TDN, SOC, SN, sand, silt, clay                 | 10                       | 39.17 | 0.21           | 31.82 |
|                                                      | Elevation, aspect, TPI, NDVI, GNDVI, temperature, moisture, pH, bulk density, NO <sub>3</sub> -N, NH <sub>4</sub> -N, DOC, TDN, SOC, SN, sand, silt, clay                       | 10                       | 39.11 | 0.21           | 31.73 |
|                                                      | Elevation, aspect, TPI, NDVI, GNDVI, temperature, moisture, pH, NO <sub>3</sub> -N, NH <sub>4</sub> -N, DOC, TDN, SOC, SN, sand, silt, clay                                     | 9                        | 38.95 | 0.22           | 31.61 |
|                                                      | Elevation, aspect, TPI, NDVI, GNDVI, temperature, moisture, pH, NO <sub>3</sub> -N, NH <sub>4</sub> -N, DOC, SOC, SN, sand, silt, clay                                          | 9                        | 38.79 | 0.23           | 31.43 |
|                                                      | Elevation, aspect, NDVI, GNDVI, temperature, moisture, pH, NO <sub>3</sub> -N, NH <sub>4</sub> -N, DOC, SOC, SN, sand, silt, clay                                               | 8                        | 38.73 | 0.23           | 31.44 |
|                                                      | Elevation, aspect, NDVI, GNDVI, temperature, moisture, pH, NO <sub>3</sub> -N, DOC, SOC, SN, sand, silt, clay                                                                   | 8                        | 38.48 | 0.24           | 31.20 |
|                                                      | Elevation, aspect, NDVI, GNDVI, temperature, moisture, pH, NO <sub>3</sub> -N, DOC, SOC, SN, sand, silt                                                                         | 7                        | 38.35 | 0.24           | 31.11 |
|                                                      | Elevation, aspect, NDVI, GNDVI, temperature, moisture, pH, NO <sub>3</sub> -N, SOC, SN, sand, silt                                                                              | 2                        | 37.86 | 0.26           | 30.79 |
|                                                      | Aspect, NDVI, GNDVI, temperature, moisture, pH, NO <sub>3</sub> -N, SOC, SN, sand, silt                                                                                         | 2                        | 37.55 | 0.28           | 30.57 |
|                                                      | Aspect, NDVI, GNDVI, temperature, moisture, pH, NO <sub>3</sub> -N, SOC, SN, silt                                                                                               | 2                        | 37.75 | 0.27           | 30.72 |
|                                                      | Aspect, NDVI, GNDVI, moisture, pH, NO <sub>3</sub> -N, SOC, SN, silt                                                                                                            | 2                        | 37.96 | 0.25           | 31.07 |
|                                                      | Aspect, NDVI, GNDVI, moisture, pH, NO <sub>3</sub> -N, SOC, SN                                                                                                                  | 2                        | 38.00 | 0.25           | 31.04 |
|                                                      | Aspect, NDVI, GNDVI, moisture, pH, NO <sub>3</sub> -N, SOC                                                                                                                      | 2                        | 37.88 | 0.25           | 30.83 |
|                                                      | Aspect, NDVI, moisture, pH, NO <sub>3</sub> -N, SOC                                                                                                                             | 2                        | 37.98 | 0.25           | 30.87 |
|                                                      | Aspect, moisture, pH, NO <sub>3</sub> -N, SOC                                                                                                                                   | 2                        | 38.83 | 0.22           | 31.24 |
|                                                      | Aspect, moisture, pH, NO <sub>3</sub> -N                                                                                                                                        | 2                        | 38.25 | 0.25           | 30.70 |
|                                                      | Aspect, pH, NO <sub>3</sub> -N                                                                                                                                                  | 2                        | 39.96 | 0.21           | 31.88 |
|                                                      | Aspect, NO <sub>3</sub> -N                                                                                                                                                      | 2                        | 41.25 | 0.19           | 32.84 |
|                                                      | Aspect                                                                                                                                                                          | 2                        | 46.08 | 0.09           | 35.89 |

532



| B4b): Grassland CH <sub>4</sub> -C negative fluxes only                                                                                                             |                                                                                                                          | 10-fold cross validation                                                                                                                                                        |       |                |       |       |
|---------------------------------------------------------------------------------------------------------------------------------------------------------------------|--------------------------------------------------------------------------------------------------------------------------|---------------------------------------------------------------------------------------------------------------------------------------------------------------------------------|-------|----------------|-------|-------|
| Category                                                                                                                                                            | Predictor variables                                                                                                      | mtry                                                                                                                                                                            | RMSE  | R <sup>2</sup> | MAE   |       |
| Remote sensing                                                                                                                                                      | Elevation, slope, aspect, TWI, TPI, NDVI, GNDVI, NDMI                                                                    | 2                                                                                                                                                                               | 17.33 | 0.15           | 13.63 |       |
|                                                                                                                                                                     | Elevation, slope, aspect, TPI, NDVI, GNDVI, NDMI                                                                         | 2                                                                                                                                                                               | 17.23 | 0.15           | 13.58 |       |
|                                                                                                                                                                     | Elevation, aspect, TPI, NDVI, GNDVI, NDMI                                                                                | 2                                                                                                                                                                               | 17.28 | 0.14           | 13.70 |       |
|                                                                                                                                                                     | Elevation, TPI, NDVI, GNDVI, NDMI                                                                                        | 2                                                                                                                                                                               | 16.93 | 0.17           | 13.53 |       |
|                                                                                                                                                                     | Elevation, NDVI, GNDVI, NDMI                                                                                             | 2                                                                                                                                                                               | 17.00 | 0.16           | 13.71 |       |
|                                                                                                                                                                     | NDVI, GNDVI, NDMI                                                                                                        | 2                                                                                                                                                                               | 17.14 | 0.16           | 13.63 |       |
|                                                                                                                                                                     | NDVI, NDMI                                                                                                               | 2                                                                                                                                                                               | 17.66 | 0.15           | 14.11 |       |
|                                                                                                                                                                     | NDMI                                                                                                                     | 2                                                                                                                                                                               | 17.72 | 0.18           | 13.86 |       |
| Site measured soil parameters                                                                                                                                       | Temperature, moisture, pH, bulk density, NO <sub>3</sub> -N, NH <sub>4</sub> -N, DOC, TDN, SOC, SN, CN, sand, silt, clay | 2                                                                                                                                                                               | 15.86 | 0.25           | 12.37 |       |
|                                                                                                                                                                     | Temperature, moisture, pH, bulk density, NO <sub>3</sub> -N, DOC, TDN, SOC, SN, CN, sand, silt, clay                     | 2                                                                                                                                                                               | 15.70 | 0.27           | 12.21 |       |
|                                                                                                                                                                     | Moisture, pH, bulk density, NO <sub>3</sub> -N, DOC, TDN, SOC, SN, CN, sand, silt, clay                                  | 2                                                                                                                                                                               | 15.50 | 0.29           | 12.07 |       |
|                                                                                                                                                                     | Moisture, pH, bulk density, NO <sub>3</sub> -N, DOC, TDN, SN, CN, sand, silt, clay                                       | 2                                                                                                                                                                               | 15.47 | 0.29           | 12.04 |       |
|                                                                                                                                                                     | Moisture, pH, bulk density, NO <sub>3</sub> -N, DOC, SN, CN, sand, silt, clay                                            | 2                                                                                                                                                                               | 15.35 | 0.31           | 11.95 |       |
|                                                                                                                                                                     | Moisture, pH, bulk density, DOC, SN, CN, sand, silt, clay                                                                | 2                                                                                                                                                                               | 15.39 | 0.30           | 12.00 |       |
|                                                                                                                                                                     | Moisture, pH, bulk density, DOC, CN, sand, silt, clay                                                                    | 2                                                                                                                                                                               | 15.29 | 0.31           | 11.94 |       |
|                                                                                                                                                                     | Moisture, pH, DOC, CN, sand, silt, clay                                                                                  | 2                                                                                                                                                                               | 15.36 | 0.30           | 12.05 |       |
|                                                                                                                                                                     | Moisture, pH, DOC, CN, silt, clay                                                                                        | 2                                                                                                                                                                               | 15.40 | 0.30           | 12.01 |       |
|                                                                                                                                                                     | Moisture, pH, CN, silt, clay                                                                                             | 2                                                                                                                                                                               | 15.14 | 0.33           | 11.79 |       |
|                                                                                                                                                                     | Moisture, pH, CN, clay                                                                                                   | 2                                                                                                                                                                               | 15.32 | 0.33           | 11.77 |       |
|                                                                                                                                                                     | pH, CN, clay                                                                                                             | 2                                                                                                                                                                               | 15.61 | 0.33           | 11.69 |       |
|                                                                                                                                                                     | pH, clay                                                                                                                 | 2                                                                                                                                                                               | 15.80 | 0.33           | 11.84 |       |
|                                                                                                                                                                     | pH                                                                                                                       | 2                                                                                                                                                                               | 18.06 | 0.20           | 14.43 |       |
|                                                                                                                                                                     | Combined                                                                                                                 | Elevation, slope, aspect, TWI, TPI, NDVI, GNDVI, NDMI, temperature, moisture, pH, bulk density, NO <sub>3</sub> -N, NH <sub>4</sub> -N, DOC, TDN, SOC, SN, CN, sand, silt, clay | 12    | 15.70          | 0.26  | 12.22 |
|                                                                                                                                                                     |                                                                                                                          | Elevation, slope, aspect, TWI, TPI, NDVI, GNDVI, NDMI, temperature, moisture, pH, bulk density, NO <sub>3</sub> -N, NH <sub>4</sub> -N, DOC, TDN, SN, CN, sand, silt, clay      | 11    | 15.61          | 0.27  | 12.12 |
| Elevation, slope, aspect, TWI, TPI, NDVI, NDMI, temperature, moisture, pH, bulk density, NO <sub>3</sub> -N, NH <sub>4</sub> -N, DOC, TDN, SN, CN, sand, silt, clay |                                                                                                                          | 11                                                                                                                                                                              | 15.60 | 0.27           | 12.12 |       |
| Elevation, slope, aspect, TPI, NDVI, NDMI, temperature, moisture, pH, bulk density, NO <sub>3</sub> -N, NH <sub>4</sub> -N, DOC, TDN, SN, CN, sand, silt, clay      |                                                                                                                          | 10                                                                                                                                                                              | 15.56 | 0.28           | 12.08 |       |
| Elevation, slope, aspect, TPI, NDVI, NDMI, temperature, moisture, pH, bulk density, NO <sub>3</sub> -N, NH <sub>4</sub> -N, DOC, TDN, SN, CN, silt, clay            |                                                                                                                          | 10                                                                                                                                                                              | 15.52 | 0.28           | 12.03 |       |
| Elevation, aspect, TPI, NDVI, NDMI, temperature, moisture, pH, bulk density, NO <sub>3</sub> -N, NH <sub>4</sub> -N, DOC, TDN, SN, CN, silt, clay                   |                                                                                                                          | 9                                                                                                                                                                               | 15.54 | 0.27           | 12.10 |       |
| Elevation, aspect, TPI, NDVI, NDMI, temperature, moisture, pH, bulk density, NH <sub>4</sub> -N, DOC, TDN, SN, CN, silt, clay                                       |                                                                                                                          | 9                                                                                                                                                                               | 15.54 | 0.28           | 12.07 |       |
| Elevation, aspect, TPI, NDVI, NDMI, temperature, moisture, pH, bulk density, DOC, TDN, SN, CN, silt, clay                                                           |                                                                                                                          | 8                                                                                                                                                                               | 15.37 | 0.29           | 11.93 |       |
| Elevation, aspect, TPI, NDVI, NDMI, temperature, moisture, pH, bulk density, DOC, TDN, CN, silt, clay                                                               |                                                                                                                          | 8                                                                                                                                                                               | 15.41 | 0.29           | 11.94 |       |
| Elevation, TPI, NDVI, NDMI, temperature, moisture, pH, bulk density, DOC, TDN, CN, silt, clay                                                                       |                                                                                                                          | 2                                                                                                                                                                               | 15.16 | 0.30           | 11.87 |       |
| Elevation, TPI, NDVI, NDMI, moisture, pH, bulk density, DOC, TDN, CN, silt, clay                                                                                    |                                                                                                                          | 2                                                                                                                                                                               | 14.98 | 0.32           | 11.73 |       |
| Elevation, NDVI, NDMI, moisture, pH, bulk density, DOC, TDN, CN, silt, clay                                                                                         |                                                                                                                          | 2                                                                                                                                                                               | 15.18 | 0.29           | 12.00 |       |
| Elevation, NDVI, NDMI, moisture, pH, DOC, TDN, CN, silt, clay                                                                                                       |                                                                                                                          | 2                                                                                                                                                                               | 15.16 | 0.29           | 11.98 |       |
| Elevation, NDVI, NDMI, moisture, pH, DOC, CN, silt, clay                                                                                                            |                                                                                                                          | 2                                                                                                                                                                               | 15.17 | 0.30           | 11.98 |       |
| Elevation, NDMI, moisture, pH, DOC, CN, silt, clay                                                                                                                  |                                                                                                                          | 2                                                                                                                                                                               | 15.06 | 0.31           | 11.76 |       |
| NDMI, moisture, pH, DOC, CN, silt, clay                                                                                                                             |                                                                                                                          | 2                                                                                                                                                                               | 15.17 | 0.31           | 11.83 |       |
| NDMI, moisture, pH, CN, silt, clay                                                                                                                                  |                                                                                                                          | 2                                                                                                                                                                               | 14.84 | 0.34           | 11.54 |       |
| NDMI, moisture, pH, CN, clay                                                                                                                                        |                                                                                                                          | 2                                                                                                                                                                               | 14.87 | 0.34           | 11.43 |       |
| Moisture, pH, CN, clay                                                                                                                                              |                                                                                                                          | 2                                                                                                                                                                               | 15.32 | 0.33           | 11.77 |       |
| pH, CN, clay                                                                                                                                                        |                                                                                                                          | 2                                                                                                                                                                               | 15.61 | 0.33           | 11.69 |       |
| pH, clay                                                                                                                                                            |                                                                                                                          | 2                                                                                                                                                                               | 15.80 | 0.33           | 11.84 |       |
| pH                                                                                                                                                                  |                                                                                                                          | 2                                                                                                                                                                               | 18.06 | 0.20           | 14.43 |       |



| B4c): Arable CH <sub>4</sub> -C negatives flux only                                                                                                                |                                                                                                                          | 10-fold cross validation                                                                                                                                                        |                     |            |       |
|--------------------------------------------------------------------------------------------------------------------------------------------------------------------|--------------------------------------------------------------------------------------------------------------------------|---------------------------------------------------------------------------------------------------------------------------------------------------------------------------------|---------------------|------------|-------|
| Category                                                                                                                                                           | Predictor variables                                                                                                      | mtry                                                                                                                                                                            | RMSE R <sup>2</sup> | MAE        |       |
| Remote sensing                                                                                                                                                     | Elevation, slope, aspect, TWI, TPI, NDVI, GNDVI, NDMI                                                                    | 2                                                                                                                                                                               | 19.54 0.42          | 14.72      |       |
|                                                                                                                                                                    | Elevation, slope, aspect, TWI, NDVI, GNDVI, NDMI                                                                         | 2                                                                                                                                                                               | 19.05 0.44          | 14.22      |       |
|                                                                                                                                                                    | Elevation, slope, aspect, NDVI, GNDVI, NDMI                                                                              | 2                                                                                                                                                                               | 18.72 0.47          | 13.86      |       |
|                                                                                                                                                                    | Elevation, aspect, NDVI, GNDVI, NDMI                                                                                     | 2                                                                                                                                                                               | 18.88 0.46          | 13.89      |       |
|                                                                                                                                                                    | Elevation, NDVI, GNDVI, NDMI                                                                                             | 2                                                                                                                                                                               | 19.47 0.39          | 14.92      |       |
|                                                                                                                                                                    | Elevation, NDVI, GNDVI                                                                                                   | 2                                                                                                                                                                               | 19.20 0.40          | 14.81      |       |
|                                                                                                                                                                    | Elevation, GNDVI                                                                                                         | 2                                                                                                                                                                               | 20.71 0.36          | 15.66      |       |
|                                                                                                                                                                    | GNDVI                                                                                                                    | 2                                                                                                                                                                               | 17.66 0.48          | 13.16      |       |
| Site measured soil parameters                                                                                                                                      | Temperature, moisture, pH, bulk density, NO <sub>3</sub> -N, NH <sub>4</sub> -N, DOC, TDN, SOC, SN, CN, sand, silt, clay | 2                                                                                                                                                                               | 17.48 0.50          | 13.27      |       |
|                                                                                                                                                                    | Moisture, pH, bulk density, NO <sub>3</sub> -N, NH <sub>4</sub> -N, DOC, TDN, SOC, SN, CN, sand, silt, clay              | 2                                                                                                                                                                               | 17.27 0.52          | 13.03      |       |
|                                                                                                                                                                    | Moisture, pH, bulk density, NO <sub>3</sub> -N, NH <sub>4</sub> -N, DOC, TDN, SOC, SN, CN, sand, clay                    | 2                                                                                                                                                                               | 17.26 0.52          | 13.01      |       |
|                                                                                                                                                                    | Moisture, pH, bulk density, NO <sub>3</sub> -N, NH <sub>4</sub> -N, DOC, TDN, SOC, SN, CN, clay                          | 2                                                                                                                                                                               | 17.37 0.52          | 13.01      |       |
|                                                                                                                                                                    | Moisture, pH, bulk density, NH <sub>4</sub> -N, DOC, TDN, SOC, SN, CN, clay                                              | 2                                                                                                                                                                               | 17.38 0.51          | 12.96      |       |
|                                                                                                                                                                    | Moisture, pH, bulk density, NH <sub>4</sub> -N, DOC, SOC, SN, CN, clay                                                   | 2                                                                                                                                                                               | 17.65 0.50          | 13.16      |       |
|                                                                                                                                                                    | Moisture, pH, NH <sub>4</sub> -N, DOC, SOC, SN, CN, clay                                                                 | 2                                                                                                                                                                               | 17.55 0.51          | 12.92      |       |
|                                                                                                                                                                    | Moisture, pH, NH <sub>4</sub> -N, DOC, SOC, SN, CN                                                                       | 2                                                                                                                                                                               | 17.67 0.49          | 13.17      |       |
|                                                                                                                                                                    | Moisture, pH, NH <sub>4</sub> -N, DOC, SN, CN                                                                            | 2                                                                                                                                                                               | 17.94 0.47          | 13.27      |       |
|                                                                                                                                                                    | Moisture, pH, DOC, SN, CN                                                                                                | 2                                                                                                                                                                               | 18.01 0.48          | 13.29      |       |
|                                                                                                                                                                    | Moisture, pH, SN, CN                                                                                                     | 2                                                                                                                                                                               | 17.77 0.50          | 13.11      |       |
|                                                                                                                                                                    | Moisture, pH, CN                                                                                                         | 2                                                                                                                                                                               | 17.70 0.50          | 13.20      |       |
|                                                                                                                                                                    | Moisture, CN                                                                                                             | 2                                                                                                                                                                               | 17.20 0.56          | 12.84      |       |
|                                                                                                                                                                    | CN                                                                                                                       | 2                                                                                                                                                                               | 18.35 0.47          | 13.70      |       |
|                                                                                                                                                                    | Combined                                                                                                                 | Elevation, slope, aspect, TWI, TPI, NDVI, GNDVI, NDMI, temperature, moisture, pH, bulk density, NO <sub>3</sub> -N, NH <sub>4</sub> -N, DOC, TDN, SOC, SN, CN, sand, silt, clay | 22                  | 18.01 0.51 | 13.33 |
|                                                                                                                                                                    |                                                                                                                          | Elevation, aspect, TWI, TPI, NDVI, GNDVI, NDMI, temperature, moisture, pH, bulk density, NO <sub>3</sub> -N, NH <sub>4</sub> -N, DOC, TDN, SOC, SN, CN, sand, silt, clay        | 21                  | 17.96 0.51 | 13.26 |
| Elevation, aspect, TWI, TPI, NDVI, GNDVI, NDMI, temperature, moisture, pH, bulk density, NO <sub>3</sub> -N, NH <sub>4</sub> -N, DOC, TDN, SOC, SN, CN, sand, clay |                                                                                                                          | 20                                                                                                                                                                              | 18.02 0.51          | 13.29      |       |
| Elevation, aspect, TWI, TPI, NDVI, GNDVI, NDMI, moisture, pH, bulk density, NO <sub>3</sub> -N, NH <sub>4</sub> -N, DOC, TDN, SOC, SN, CN, sand, clay              |                                                                                                                          | 19                                                                                                                                                                              | 17.92 0.51          | 13.20      |       |
| Elevation, aspect, TPI, NDVI, GNDVI, NDMI, moisture, pH, bulk density, NO <sub>3</sub> -N, NH <sub>4</sub> -N, DOC, TDN, SOC, SN, CN, sand, clay                   |                                                                                                                          | 18                                                                                                                                                                              | 17.80 0.52          | 13.14      |       |
| Elevation, aspect, NDVI, GNDVI, NDMI, moisture, pH, bulk density, NO <sub>3</sub> -N, NH <sub>4</sub> -N, DOC, TDN, SOC, SN, CN, sand, clay                        |                                                                                                                          | 17                                                                                                                                                                              | 17.77 0.52          | 13.15      |       |
| Elevation, aspect, NDVI, GNDVI, NDMI, moisture, pH, NO <sub>3</sub> -N, NH <sub>4</sub> -N, DOC, TDN, SOC, SN, CN, sand, clay                                      |                                                                                                                          | 2                                                                                                                                                                               | 17.48 0.51          | 13.04      |       |
| Elevation, aspect, NDVI, GNDVI, NDMI, moisture, pH, NO <sub>3</sub> -N, NH <sub>4</sub> -N, DOC, TDN, SOC, SN, CN, clay                                            |                                                                                                                          | 2                                                                                                                                                                               | 17.66 0.51          | 13.11      |       |
| Elevation, aspect, NDVI, GNDVI, NDMI, moisture, pH, NO <sub>3</sub> -N, NH <sub>4</sub> -N, DOC, TDN, SN, CN, clay                                                 |                                                                                                                          | 2                                                                                                                                                                               | 17.60 0.51          | 13.04      |       |
| Elevation, aspect, NDVI, GNDVI, NDMI, moisture, pH, NH <sub>4</sub> -N, DOC, TDN, SN, CN, clay                                                                     |                                                                                                                          | 2                                                                                                                                                                               | 17.57 0.52          | 13.04      |       |
| Elevation, aspect, NDVI, GNDVI, NDMI, moisture, pH, DOC, SN, CN, clay                                                                                              |                                                                                                                          | 2                                                                                                                                                                               | 17.85 0.50          | 13.25      |       |
| Elevation, aspect, NDVI, GNDVI, NDMI, moisture, pH, DOC, SN, CN                                                                                                    |                                                                                                                          | 2                                                                                                                                                                               | 17.73 0.51          | 13.12      |       |
| Elevation, aspect, NDVI, GNDVI, NDMI, moisture, pH, DOC, SN, CN                                                                                                    |                                                                                                                          | 2                                                                                                                                                                               | 17.71 0.51          | 13.27      |       |
| Elevation, NDVI, GNDVI, NDMI, moisture, pH, DOC, SN, CN                                                                                                            |                                                                                                                          | 2                                                                                                                                                                               | 18.25 0.47          | 14.02      |       |
| Elevation, NDVI, GNDVI, NDMI, moisture, pH, DOC, CN                                                                                                                |                                                                                                                          | 2                                                                                                                                                                               | 18.26 0.46          | 14.10      |       |
| Elevation, GNDVI, NDMI, moisture, pH, DOC, CN                                                                                                                      |                                                                                                                          | 2                                                                                                                                                                               | 18.45 0.47          | 14.12      |       |
| Elevation, GNDVI, NDMI, moisture, pH, CN                                                                                                                           |                                                                                                                          | 2                                                                                                                                                                               | 18.36 0.47          | 14.13      |       |
| Elevation, GNDVI, moisture, pH, CN                                                                                                                                 |                                                                                                                          | 2                                                                                                                                                                               | 18.12 0.48          | 13.93      |       |
| GNDVI, moisture, pH, CN                                                                                                                                            |                                                                                                                          | 2                                                                                                                                                                               | 17.79 0.49          | 13.49      |       |
| Moisture, pH, CN                                                                                                                                                   |                                                                                                                          | 2                                                                                                                                                                               | 17.70 0.50          | 13.20      |       |
| Moisture, CN                                                                                                                                                       |                                                                                                                          | 2                                                                                                                                                                               | 17.20 0.56          | 12.84      |       |
| CN                                                                                                                                                                 |                                                                                                                          | 2                                                                                                                                                                               | 18.35 0.47          | 13.70      |       |





535 **Table B5 a, b, c:** Cross-validation results of different models developed for positive N<sub>2</sub>O fluxes in 5a) forest, 5b) grassland and 5c)  
 536 arable land using different predictors in the training dataset. Stepwise elimination of least important predictors was implemented.

| B5a): Forest N <sub>2</sub> O-N positive fluxes only                                                                                                                      |                                                                                                                          | 10-fold cross validation                                                                                                                                                        |      |                |      |
|---------------------------------------------------------------------------------------------------------------------------------------------------------------------------|--------------------------------------------------------------------------------------------------------------------------|---------------------------------------------------------------------------------------------------------------------------------------------------------------------------------|------|----------------|------|
| Category                                                                                                                                                                  | Predictor variables                                                                                                      | mtry                                                                                                                                                                            | RMSE | R <sup>2</sup> | MAE  |
| Remote sensing                                                                                                                                                            | Elevation, slope, aspect, TWI, TPI, NDVI, GNDVI, NDMI                                                                    | 2                                                                                                                                                                               | 0.34 | 0.15           | 0.24 |
|                                                                                                                                                                           | Elevation, aspect, TWI, TPI, NDVI, GNDVI, NDMI                                                                           | 2                                                                                                                                                                               | 0.34 | 0.15           | 0.24 |
|                                                                                                                                                                           | Elevation, aspect, TPI, NDVI, GNDVI, NDMI                                                                                | 2                                                                                                                                                                               | 0.33 | 0.17           | 0.23 |
|                                                                                                                                                                           | Elevation, aspect, NDVI, GNDVI, NDMI                                                                                     | 2                                                                                                                                                                               | 0.33 | 0.19           | 0.24 |
|                                                                                                                                                                           | Aspect, NDVI, GNDVI, NDMI                                                                                                | 2                                                                                                                                                                               | 0.33 | 0.23           | 0.23 |
|                                                                                                                                                                           | Aspect, NDVI, NDMI                                                                                                       | 2                                                                                                                                                                               | 0.33 | 0.19           | 0.24 |
|                                                                                                                                                                           | Aspect, NDVI                                                                                                             | 2                                                                                                                                                                               | 0.33 | 0.26           | 0.23 |
|                                                                                                                                                                           | NDVI                                                                                                                     | 2                                                                                                                                                                               | 0.36 | 0.19           | 0.24 |
| Site measured soil parameters                                                                                                                                             | Temperature, moisture, pH, bulk density, NO <sub>3</sub> -N, NH <sub>4</sub> -N, DOC, TDN, SOC, SN, CN, sand, silt, clay | 14                                                                                                                                                                              | 0.31 | 0.24           | 0.23 |
|                                                                                                                                                                           | Temperature, moisture, pH, bulk density, NO <sub>3</sub> -N, DOC, TDN, SOC, SN, CN, sand, silt, clay                     | 13                                                                                                                                                                              | 0.31 | 0.23           | 0.23 |
|                                                                                                                                                                           | Temperature, moisture, bulk density, NO <sub>3</sub> -N, DOC, TDN, SOC, SN, CN, sand, silt, clay                         | 12                                                                                                                                                                              | 0.31 | 0.24           | 0.22 |
|                                                                                                                                                                           | Temperature, moisture, bulk density, NO <sub>3</sub> -N, DOC, TDN, SOC, CN, sand, silt, clay                             | 11                                                                                                                                                                              | 0.31 | 0.25           | 0.22 |
|                                                                                                                                                                           | Temperature, moisture, bulk density, NO <sub>3</sub> -N, DOC, TDN, SOC, sand, silt, clay                                 | 10                                                                                                                                                                              | 0.31 | 0.25           | 0.22 |
|                                                                                                                                                                           | Temperature, moisture, bulk density, NO <sub>3</sub> -N, DOC, TDN, sand, silt, clay                                      | 9                                                                                                                                                                               | 0.31 | 0.25           | 0.22 |
|                                                                                                                                                                           | Temperature, moisture, bulk density, NO <sub>3</sub> -N, DOC, sand, silt, clay                                           | 8                                                                                                                                                                               | 0.31 | 0.25           | 0.22 |
|                                                                                                                                                                           | Temperature, moisture, bulk density, NO <sub>3</sub> -N, DOC, silt, clay                                                 | 7                                                                                                                                                                               | 0.30 | 0.26           | 0.22 |
|                                                                                                                                                                           | Temperature, moisture, bulk density, NO <sub>3</sub> -N, silt, clay                                                      | 6                                                                                                                                                                               | 0.31 | 0.26           | 0.22 |
|                                                                                                                                                                           | Moisture, bulk density, NO <sub>3</sub> -N, silt, clay                                                                   | 2                                                                                                                                                                               | 0.31 | 0.27           | 0.22 |
|                                                                                                                                                                           | Moisture, bulk density, silt, clay                                                                                       | 2                                                                                                                                                                               | 0.32 | 0.20           | 0.23 |
|                                                                                                                                                                           | Moisture, silt, clay                                                                                                     | 2                                                                                                                                                                               | 0.33 | 0.19           | 0.24 |
|                                                                                                                                                                           | Silt, clay                                                                                                               | 2                                                                                                                                                                               | 0.35 | 0.17           | 0.25 |
|                                                                                                                                                                           | Silt                                                                                                                     | 2                                                                                                                                                                               | 0.36 | 0.16           | 0.26 |
|                                                                                                                                                                           | Combined                                                                                                                 | Elevation, slope, aspect, TWI, TPI, NDVI, GNDVI, NDMI, temperature, moisture, pH, bulk density, NO <sub>3</sub> -N, NH <sub>4</sub> -N, DOC, TDN, SOC, SN, CN, sand, silt, clay | 22   | 0.30           | 0.25 |
| Elevation, slope, aspect, TWI, TPI, GNDVI, NDMI, temperature, moisture, pH, bulk density, NO <sub>3</sub> -N, NH <sub>4</sub> -N, DOC, TDN, SOC, SN, CN, sand, silt, clay |                                                                                                                          | 21                                                                                                                                                                              | 0.30 | 0.25           | 0.22 |
| Elevation, slope, aspect, TPI, GNDVI, NDMI, temperature, moisture, pH, bulk density, NO <sub>3</sub> -N, NH <sub>4</sub> -N, DOC, TDN, SOC, SN, CN, sand, silt, clay      |                                                                                                                          | 20                                                                                                                                                                              | 0.30 | 0.25           | 0.22 |
| Elevation, slope, aspect, GNDVI, NDMI, temperature, moisture, pH, bulk density, NO <sub>3</sub> -N, NH <sub>4</sub> -N, DOC, TDN, SOC, SN, CN, sand, silt, clay           |                                                                                                                          | 19                                                                                                                                                                              | 0.30 | 0.25           | 0.22 |
| Elevation, aspect, GNDVI, NDMI, temperature, moisture, pH, bulk density, NO <sub>3</sub> -N, NH <sub>4</sub> -N, DOC, TDN, SOC, SN, CN, sand, silt, clay                  |                                                                                                                          | 18                                                                                                                                                                              | 0.30 | 0.25           | 0.22 |
| Elevation, aspect, GNDVI, NDMI, temperature, moisture, pH, bulk density, NO <sub>3</sub> -N, DOC, TDN, SOC, SN, CN, sand, silt, clay                                      |                                                                                                                          | 17                                                                                                                                                                              | 0.30 | 0.25           | 0.22 |
| Elevation, aspect, GNDVI, NDMI, temperature, moisture, pH, bulk density, NO <sub>3</sub> -N, DOC, TDN, SOC, CN, sand, silt, clay                                          |                                                                                                                          | 16                                                                                                                                                                              | 0.30 | 0.26           | 0.22 |
| Aspect, GNDVI, NDMI, temperature, moisture, pH, bulk density, NO <sub>3</sub> -N, DOC, TDN, SOC, CN, sand, silt, clay                                                     |                                                                                                                          | 15                                                                                                                                                                              | 0.30 | 0.26           | 0.21 |
| Aspect, GNDVI, NDMI, temperature, moisture, bulk density, NO <sub>3</sub> -N, DOC, TDN, SOC, CN, sand, silt, clay                                                         |                                                                                                                          | 14                                                                                                                                                                              | 0.30 | 0.26           | 0.21 |
| Aspect, GNDVI, NDMI, temperature, moisture, bulk density, NO <sub>3</sub> -N, DOC, TDN, SOC, sand, silt, clay                                                             |                                                                                                                          | 2                                                                                                                                                                               | 0.30 | 0.28           | 0.21 |
| Aspect, GNDVI, NDMI, temperature, moisture, bulk density, NO <sub>3</sub> -N, DOC, TDN, sand, silt, clay                                                                  |                                                                                                                          | 2                                                                                                                                                                               | 0.30 | 0.28           | 0.21 |
| Aspect, NDMI, temperature, moisture, bulk density, NO <sub>3</sub> -N, DOC, TDN, sand, silt, clay                                                                         |                                                                                                                          | 2                                                                                                                                                                               | 0.30 | 0.26           | 0.22 |
| Aspect, NDMI, temperature, moisture, bulk density, NO <sub>3</sub> -N, DOC, sand, silt, clay                                                                              |                                                                                                                          | 2                                                                                                                                                                               | 0.30 | 0.25           | 0.22 |
| Aspect, temperature, moisture, bulk density, NO <sub>3</sub> -N, DOC, sand, silt, clay                                                                                    |                                                                                                                          | 5                                                                                                                                                                               | 0.30 | 0.25           | 0.22 |
| Aspect, temperature, moisture, bulk density, NO <sub>3</sub> -N, DOC, silt, clay                                                                                          |                                                                                                                          | 2                                                                                                                                                                               | 0.30 | 0.26           | 0.22 |
| Aspect, temperature, moisture, bulk density, DOC, silt, clay                                                                                                              |                                                                                                                          | 7                                                                                                                                                                               | 0.30 | 0.25           | 0.22 |
| Aspect, temperature, moisture, DOC, silt, clay                                                                                                                            |                                                                                                                          | 6                                                                                                                                                                               | 0.29 | 0.26           | 0.21 |
| Aspect, temperature, moisture, DOC, silt                                                                                                                                  |                                                                                                                          | 5                                                                                                                                                                               | 0.28 | 0.29           | 0.21 |
| Aspect, temperature, moisture, silt                                                                                                                                       |                                                                                                                          | 3                                                                                                                                                                               | 0.29 | 0.26           | 0.21 |
| Aspect, moisture, silt                                                                                                                                                    |                                                                                                                          | 2                                                                                                                                                                               | 0.30 | 0.27           | 0.22 |
| Moisture, silt                                                                                                                                                            |                                                                                                                          | 2                                                                                                                                                                               | 0.32 | 0.22           | 0.23 |
| Silt                                                                                                                                                                      |                                                                                                                          | 2                                                                                                                                                                               | 0.36 | 0.16           | 0.26 |

537



| B5b): Grassland N <sub>2</sub> O-N positive fluxes only                                                                                                      |                                                                                                                          | 10-fold cross validation                                                                                                                                                        |      |                |      |      |
|--------------------------------------------------------------------------------------------------------------------------------------------------------------|--------------------------------------------------------------------------------------------------------------------------|---------------------------------------------------------------------------------------------------------------------------------------------------------------------------------|------|----------------|------|------|
| Category                                                                                                                                                     | Predictor variables                                                                                                      | mtry                                                                                                                                                                            | RMSE | R <sup>2</sup> | MAE  |      |
| Remote sensing                                                                                                                                               | Elevation, slope, aspect, TWI, TPI, NDVI, GNDVI, NDMI                                                                    | 2                                                                                                                                                                               | 0.50 | 0.26           | 0.38 |      |
|                                                                                                                                                              | Elevation, slope, aspect, TPI, NDVI, GNDVI, NDMI                                                                         | 4                                                                                                                                                                               | 0.51 | 0.26           | 0.39 |      |
|                                                                                                                                                              | Elevation, slope, aspect, NDVI, GNDVI, NDMI                                                                              | 4                                                                                                                                                                               | 0.51 | 0.27           | 0.38 |      |
|                                                                                                                                                              | Elevation, slope, aspect, NDVI, NDMI                                                                                     | 2                                                                                                                                                                               | 0.50 | 0.27           | 0.37 |      |
|                                                                                                                                                              | Elevation, aspect, NDVI, NDMI                                                                                            | 4                                                                                                                                                                               | 0.51 | 0.25           | 0.38 |      |
|                                                                                                                                                              | Elevation, NDVI, NDMI                                                                                                    | 3                                                                                                                                                                               | 0.50 | 0.25           | 0.37 |      |
|                                                                                                                                                              | Elevation, NDMI                                                                                                          | 2                                                                                                                                                                               | 0.49 | 0.28           | 0.37 |      |
|                                                                                                                                                              | Elevation                                                                                                                | 2                                                                                                                                                                               | 0.49 | 0.35           | 0.37 |      |
| Site measured soil parameters                                                                                                                                | Temperature, moisture, pH, bulk density, NO <sub>3</sub> -N, NH <sub>4</sub> -N, DOC, TDN, SOC, SN, CN, sand, silt, clay | 2                                                                                                                                                                               | 0.51 | 0.18           | 0.38 |      |
|                                                                                                                                                              | Temperature, moisture, pH, bulk density, NO <sub>3</sub> -N, NH <sub>4</sub> -N, TDN, SOC, SN, CN, sand, silt, clay      | 2                                                                                                                                                                               | 0.51 | 0.19           | 0.38 |      |
|                                                                                                                                                              | Temperature, moisture, pH, NO <sub>3</sub> -N, NH <sub>4</sub> -N, TDN, SOC, SN, CN, sand, silt, clay                    | 2                                                                                                                                                                               | 0.50 | 0.19           | 0.37 |      |
|                                                                                                                                                              | Temperature, moisture, pH, NO <sub>3</sub> -N, NH <sub>4</sub> -N, TDN, SOC, SN, CN, silt, clay                          | 2                                                                                                                                                                               | 0.50 | 0.20           | 0.37 |      |
|                                                                                                                                                              | Moisture, pH, NO <sub>3</sub> -N, NH <sub>4</sub> -N, TDN, SOC, SN, CN, silt, clay                                       | 2                                                                                                                                                                               | 0.50 | 0.19           | 0.38 |      |
|                                                                                                                                                              | Moisture, pH, NO <sub>3</sub> -N, NH <sub>4</sub> -N, TDN, SOC, SN, CN, clay                                             | 2                                                                                                                                                                               | 0.50 | 0.22           | 0.38 |      |
|                                                                                                                                                              | Moisture, pH, NO <sub>3</sub> -N, NH <sub>4</sub> -N, TDN, SN, CN, clay                                                  | 2                                                                                                                                                                               | 0.50 | 0.22           | 0.37 |      |
|                                                                                                                                                              | Moisture, pH, NH <sub>4</sub> -N, TDN, SN, CN, clay                                                                      | 2                                                                                                                                                                               | 0.50 | 0.23           | 0.37 |      |
|                                                                                                                                                              | Moisture, NH <sub>4</sub> -N, TDN, SN, CN, clay                                                                          | 2                                                                                                                                                                               | 0.49 | 0.25           | 0.37 |      |
|                                                                                                                                                              | Moisture, NH <sub>4</sub> -N, TDN, CN, clay                                                                              | 2                                                                                                                                                                               | 0.49 | 0.26           | 0.37 |      |
|                                                                                                                                                              | Moisture, TDN, CN, clay                                                                                                  | 2                                                                                                                                                                               | 0.47 | 0.33           | 0.35 |      |
|                                                                                                                                                              | Moisture, TDN, clay                                                                                                      | 2                                                                                                                                                                               | 0.45 | 0.37           | 0.33 |      |
|                                                                                                                                                              | Moisture, clay                                                                                                           | 2                                                                                                                                                                               | 0.49 | 0.31           | 0.36 |      |
|                                                                                                                                                              | Moisture                                                                                                                 | 2                                                                                                                                                                               | 0.51 | 0.25           | 0.35 |      |
|                                                                                                                                                              | Combined                                                                                                                 | Elevation, slope, aspect, TWI, TPI, NDVI, GNDVI, NDMI, temperature, moisture, pH, bulk density, NO <sub>3</sub> -N, NH <sub>4</sub> -N, DOC, TDN, SOC, SN, CN, sand, silt, clay | 2    | 0.49           | 0.21 | 0.37 |
|                                                                                                                                                              |                                                                                                                          | Elevation, slope, aspect, TWI, TPI, NDVI, GNDVI, NDMI, temperature, moisture, pH, bulk density, NO <sub>3</sub> -N, NH <sub>4</sub> -N, TDN, SOC, SN, CN, sand, silt, clay      | 2    | 0.49           | 0.22 | 0.37 |
| Elevation, slope, aspect, TWI, TPI, NDVI, GNDVI, NDMI, temperature, moisture, pH, NO <sub>3</sub> -N, NH <sub>4</sub> -N, TDN, SOC, SN, CN, sand, silt, clay |                                                                                                                          | 2                                                                                                                                                                               | 0.49 | 0.23           | 0.37 |      |
| Elevation, slope, aspect, TPI, NDVI, GNDVI, NDMI, temperature, moisture, pH, NO <sub>3</sub> -N, NH <sub>4</sub> -N, TDN, SOC, SN, CN, sand, silt, clay      |                                                                                                                          | 2                                                                                                                                                                               | 0.49 | 0.23           | 0.37 |      |
| Elevation, slope, aspect, TPI, NDVI, NDMI, temperature, moisture, pH, NO <sub>3</sub> -N, NH <sub>4</sub> -N, TDN, SOC, SN, CN, sand, silt, clay             |                                                                                                                          | 2                                                                                                                                                                               | 0.49 | 0.24           | 0.37 |      |
| Elevation, slope, aspect, NDVI, NDMI, temperature, moisture, pH, NO <sub>3</sub> -N, NH <sub>4</sub> -N, TDN, SOC, SN, CN, sand, silt, clay                  |                                                                                                                          | 2                                                                                                                                                                               | 0.49 | 0.23           | 0.37 |      |
| Elevation, aspect, NDVI, NDMI, temperature, moisture, pH, NO <sub>3</sub> -N, NH <sub>4</sub> -N, TDN, SOC, SN, CN, sand, silt, clay                         |                                                                                                                          | 2                                                                                                                                                                               | 0.49 | 0.23           | 0.37 |      |
| Elevation, NDVI, NDMI, temperature, moisture, pH, NO <sub>3</sub> -N, NH <sub>4</sub> -N, TDN, SOC, SN, CN, sand, silt, clay                                 |                                                                                                                          | 2                                                                                                                                                                               | 0.49 | 0.21           | 0.37 |      |
| Elevation, NDVI, NDMI, temperature, moisture, pH, NO <sub>3</sub> -N, NH <sub>4</sub> -N, TDN, SOC, SN, CN, silt, clay                                       |                                                                                                                          | 2                                                                                                                                                                               | 0.49 | 0.22           | 0.37 |      |
| Elevation, NDVI, NDMI, temperature, moisture, pH, NO <sub>3</sub> -N, NH <sub>4</sub> -N, TDN, SOC, CN, silt, clay                                           |                                                                                                                          | 2                                                                                                                                                                               | 0.49 | 0.23           | 0.36 |      |
| Elevation, NDVI, NDMI, temperature, moisture, NO <sub>3</sub> -N, NH <sub>4</sub> -N, TDN, SOC, CN, silt, clay                                               |                                                                                                                          | 2                                                                                                                                                                               | 0.49 | 0.24           | 0.36 |      |
| Elevation, NDVI, NDMI, temperature, moisture, NO <sub>3</sub> -N, NH <sub>4</sub> -N, TDN, CN, silt, clay                                                    |                                                                                                                          | 2                                                                                                                                                                               | 0.48 | 0.24           | 0.35 |      |
| Elevation, NDVI, NDMI, moisture, NO <sub>3</sub> -N, NH <sub>4</sub> -N, TDN, CN, silt, clay                                                                 |                                                                                                                          | 2                                                                                                                                                                               | 0.48 | 0.23           | 0.36 |      |
| Elevation, NDVI, NDMI, moisture, NH <sub>4</sub> -N, TDN, CN, silt, clay                                                                                     |                                                                                                                          | 2                                                                                                                                                                               | 0.48 | 0.26           | 0.35 |      |
| Elevation, NDVI, NDMI, moisture, TDN, CN, silt, clay                                                                                                         |                                                                                                                          | 2                                                                                                                                                                               | 0.47 | 0.28           | 0.35 |      |
| Elevation, NDVI, NDMI, moisture, TDN, CN, clay                                                                                                               |                                                                                                                          | 2                                                                                                                                                                               | 0.46 | 0.31           | 0.34 |      |
| NDVI, NDMI, moisture, TDN, CN, clay                                                                                                                          |                                                                                                                          | 2                                                                                                                                                                               | 0.47 | 0.31           | 0.34 |      |
| NDVI, moisture, TDN, CN, clay                                                                                                                                |                                                                                                                          | 2                                                                                                                                                                               | 0.46 | 0.33           | 0.34 |      |
| NDVI, moisture, TDN                                                                                                                                          |                                                                                                                          | 2                                                                                                                                                                               | 0.45 | 0.37           | 0.33 |      |
| NDVI, moisture                                                                                                                                               |                                                                                                                          | 2                                                                                                                                                                               | 0.46 | 0.31           | 0.33 |      |
| NDMI, moisture                                                                                                                                               |                                                                                                                          | 2                                                                                                                                                                               | 0.42 | 0.38           | 0.31 |      |
| NDMI                                                                                                                                                         |                                                                                                                          | 2                                                                                                                                                                               | 0.58 | 0.11           | 0.43 |      |



| B5c): Arable N <sub>2</sub> O-N positive fluxes only                                                                                                                       |                                                                                                                          | 10-fold cross validation                                                                                                                                                        |      |                |      |
|----------------------------------------------------------------------------------------------------------------------------------------------------------------------------|--------------------------------------------------------------------------------------------------------------------------|---------------------------------------------------------------------------------------------------------------------------------------------------------------------------------|------|----------------|------|
| Category                                                                                                                                                                   | Predictor variables                                                                                                      | mtry                                                                                                                                                                            | RMSE | R <sup>2</sup> | MAE  |
| Remote sensing                                                                                                                                                             | Elevation, slope, aspect, TWI, TPI, NDVI, GNDVI, NDMI                                                                    | 5                                                                                                                                                                               | 0.43 | 0.63           | 0.34 |
|                                                                                                                                                                            | Elevation, aspect, TWI, TPI, NDVI, GNDVI, NDMI                                                                           | 4                                                                                                                                                                               | 0.42 | 0.64           | 0.34 |
|                                                                                                                                                                            | Elevation, aspect, TPI, NDVI, GNDVI, NDMI                                                                                | 4                                                                                                                                                                               | 0.41 | 0.65           | 0.33 |
|                                                                                                                                                                            | Elevation, aspect, NDVI, GNDVI, NDMI                                                                                     | 2                                                                                                                                                                               | 0.41 | 0.66           | 0.32 |
|                                                                                                                                                                            | Elevation, NDVI, GNDVI, NDMI                                                                                             | 2                                                                                                                                                                               | 0.42 | 0.65           | 0.33 |
|                                                                                                                                                                            | NDVI, GNDVI, NDMI                                                                                                        | 2                                                                                                                                                                               | 0.42 | 0.65           | 0.33 |
|                                                                                                                                                                            | GNDVI, NDMI                                                                                                              | 2                                                                                                                                                                               | 0.44 | 0.63           | 0.34 |
|                                                                                                                                                                            | GNDVI                                                                                                                    | 2                                                                                                                                                                               | 0.52 | 0.51           | 0.40 |
| Site measured soil parameters                                                                                                                                              | Temperature, moisture, pH, bulk density, NO <sub>3</sub> -N, NH <sub>4</sub> -N, DOC, TDN, SOC, SN, CN, sand, silt, clay | 2                                                                                                                                                                               | 0.55 | 0.39           | 0.46 |
|                                                                                                                                                                            | Temperature, moisture, pH, bulk density, NO <sub>3</sub> -N, NH <sub>4</sub> -N, DOC, TDN, SOC, SN, CN, silt, clay       | 2                                                                                                                                                                               | 0.55 | 0.40           | 0.45 |
|                                                                                                                                                                            | Temperature, moisture, pH, NO <sub>3</sub> -N, NH <sub>4</sub> -N, DOC, TDN, SOC, SN, CN, silt, clay                     | 2                                                                                                                                                                               | 0.54 | 0.41           | 0.45 |
|                                                                                                                                                                            | Temperature, moisture, NO <sub>3</sub> -N, NH <sub>4</sub> -N, DOC, TDN, SOC, SN, CN, silt, clay                         | 2                                                                                                                                                                               | 0.54 | 0.42           | 0.45 |
|                                                                                                                                                                            | Temperature, moisture, NO <sub>3</sub> -N, NH <sub>4</sub> -N, DOC, TDN, SOC, SN, CN, clay                               | 2                                                                                                                                                                               | 0.54 | 0.42           | 0.44 |
|                                                                                                                                                                            | Moisture, NO <sub>3</sub> -N, NH <sub>4</sub> -N, DOC, TDN, SOC, SN, CN, clay                                            | 2                                                                                                                                                                               | 0.54 | 0.41           | 0.44 |
|                                                                                                                                                                            | Moisture, NO <sub>3</sub> -N, NH <sub>4</sub> -N, DOC, TDN, SOC, SN, CN                                                  | 2                                                                                                                                                                               | 0.55 | 0.38           | 0.45 |
|                                                                                                                                                                            | Moisture, NO <sub>3</sub> -N, NH <sub>4</sub> -N, TDN, SOC, SN, CN                                                       | 2                                                                                                                                                                               | 0.56 | 0.39           | 0.45 |
|                                                                                                                                                                            | Moisture, NO <sub>3</sub> -N, NH <sub>4</sub> -N, SOC, SN, CN                                                            | 4                                                                                                                                                                               | 0.56 | 0.37           | 0.46 |
|                                                                                                                                                                            | Moisture, NO <sub>3</sub> -N, NH <sub>4</sub> -N, SN, CN                                                                 | 2                                                                                                                                                                               | 0.56 | 0.39           | 0.45 |
|                                                                                                                                                                            | Moisture, NO <sub>3</sub> -N, NH <sub>4</sub> -N, SN                                                                     | 2                                                                                                                                                                               | 0.55 | 0.40           | 0.45 |
|                                                                                                                                                                            | Moisture, NO <sub>3</sub> -N, SN                                                                                         | 2                                                                                                                                                                               | 0.56 | 0.38           | 0.46 |
|                                                                                                                                                                            | Moisture, SN                                                                                                             | 2                                                                                                                                                                               | 0.58 | 0.34           | 0.48 |
|                                                                                                                                                                            | Moisture                                                                                                                 | 2                                                                                                                                                                               | 0.65 | 0.29           | 0.52 |
|                                                                                                                                                                            | Combined                                                                                                                 | Elevation, slope, aspect, TWI, TPI, NDVI, GNDVI, NDMI, temperature, moisture, pH, bulk density, NO <sub>3</sub> -N, NH <sub>4</sub> -N, DOC, TDN, SOC, SN, CN, sand, silt, clay | 12   | 0.43           | 0.62 |
| Elevation, slope, aspect, TPI, NDVI, GNDVI, NDMI, temperature, moisture, pH, bulk density, NO <sub>3</sub> -N, NH <sub>4</sub> -N, DOC, TDN, SOC, SN, CN, sand, silt, clay |                                                                                                                          | 11                                                                                                                                                                              | 0.43 | 0.62           | 0.34 |
| Elevation, slope, aspect, TPI, NDVI, GNDVI, NDMI, temperature, moisture, pH, bulk density, NO <sub>3</sub> -N, NH <sub>4</sub> -N, DOC, TDN, SOC, SN, CN, silt, clay       |                                                                                                                          | 11                                                                                                                                                                              | 0.43 | 0.62           | 0.34 |
| Elevation, aspect, TPI, NDVI, GNDVI, NDMI, temperature, moisture, pH, bulk density, NO <sub>3</sub> -N, NH <sub>4</sub> -N, DOC, TDN, SOC, SN, CN, silt, clay              |                                                                                                                          | 10                                                                                                                                                                              | 0.43 | 0.62           | 0.34 |
| Elevation, aspect, TPI, NDVI, GNDVI, NDMI, temperature, moisture, bulk density, NO <sub>3</sub> -N, NH <sub>4</sub> -N, DOC, TDN, SOC, SN, CN, silt, clay                  |                                                                                                                          | 10                                                                                                                                                                              | 0.42 | 0.63           | 0.33 |
| Elevation, aspect, TPI, NDVI, GNDVI, NDMI, temperature, moisture, bulk density, NO <sub>3</sub> -N, NH <sub>4</sub> -N, DOC, TDN, SOC, SN, CN, silt                        |                                                                                                                          | 9                                                                                                                                                                               | 0.43 | 0.63           | 0.34 |
| Elevation, aspect, TPI, NDVI, GNDVI, NDMI, temperature, moisture, bulk density, NO <sub>3</sub> -N, NH <sub>4</sub> -N, DOC, TDN, SOC, SN, CN                              |                                                                                                                          | 9                                                                                                                                                                               | 0.42 | 0.63           | 0.33 |
| Elevation, aspect, TPI, NDVI, GNDVI, NDMI, temperature, moisture, NO <sub>3</sub> -N, NH <sub>4</sub> -N, DOC, TDN, SOC, SN, CN                                            |                                                                                                                          | 8                                                                                                                                                                               | 0.42 | 0.64           | 0.33 |
| Elevation, aspect, NDVI, GNDVI, NDMI, temperature, moisture, NO <sub>3</sub> -N, NH <sub>4</sub> -N, DOC, TDN, SOC, SN, CN                                                 |                                                                                                                          | 8                                                                                                                                                                               | 0.42 | 0.64           | 0.33 |
| Elevation, aspect, NDVI, GNDVI, NDMI, temperature, moisture, NO <sub>3</sub> -N, NH <sub>4</sub> -N, DOC, TDN, SOC, CN                                                     |                                                                                                                          | 7                                                                                                                                                                               | 0.41 | 0.65           | 0.32 |
| Elevation, aspect, NDVI, GNDVI, NDMI, temperature, moisture, NO <sub>3</sub> -N, DOC, TDN, SOC, CN                                                                         |                                                                                                                          | 7                                                                                                                                                                               | 0.41 | 0.65           | 0.33 |
| Elevation, NDVI, GNDVI, NDMI, temperature, moisture, NO <sub>3</sub> -N, DOC, TDN, SOC, CN                                                                                 |                                                                                                                          | 6                                                                                                                                                                               | 0.42 | 0.65           | 0.33 |
| Elevation, NDVI, GNDVI, NDMI, temperature, moisture, NO <sub>3</sub> -N, TDN, SOC, CN                                                                                      |                                                                                                                          | 6                                                                                                                                                                               | 0.41 | 0.65           | 0.32 |
| NDVI, GNDVI, NDMI, temperature, moisture, NO <sub>3</sub> -N, TDN, SOC, CN                                                                                                 |                                                                                                                          | 5                                                                                                                                                                               | 0.41 | 0.66           | 0.32 |
| NDVI, GNDVI, NDMI, moisture, NO <sub>3</sub> -N, TDN, SOC, CN                                                                                                              |                                                                                                                          | 5                                                                                                                                                                               | 0.41 | 0.66           | 0.32 |
| NDVI, GNDVI, NDMI, moisture, NO <sub>3</sub> -N, TDN, CN                                                                                                                   |                                                                                                                          | 4                                                                                                                                                                               | 0.40 | 0.68           | 0.31 |
| NDVI, GNDVI, NDMI, moisture, TDN, CN                                                                                                                                       |                                                                                                                          | 6                                                                                                                                                                               | 0.40 | 0.68           | 0.31 |
| GNDVI, NDMI, moisture, TDN, CN                                                                                                                                             |                                                                                                                          | 5                                                                                                                                                                               | 0.40 | 0.68           | 0.31 |
| GNDVI, NDMI, TDN, CN                                                                                                                                                       |                                                                                                                          | 3                                                                                                                                                                               | 0.39 | 0.69           | 0.31 |
| GNDVI, NDMI, TDN                                                                                                                                                           |                                                                                                                          | 3                                                                                                                                                                               | 0.37 | 0.72           | 0.30 |
| GNDVI, NDMI                                                                                                                                                                |                                                                                                                          | 2                                                                                                                                                                               | 0.44 | 0.63           | 0.34 |
| GNDVI                                                                                                                                                                      |                                                                                                                          | 2                                                                                                                                                                               | 0.52 | 0.51           | 0.40 |



540 **Table B6:** The minimum, maximum, mean, standard deviation, and standard error of the measured fluxes at all the sampling points  
 541 and the predicted landscape fluxes using remote sensing (RS), soil properties (SP), and combined data (CD).

| Measured fluxes at sampling points          |                                                                | Summer |     |      |       |       | Autumn |     |      |       |       |
|---------------------------------------------|----------------------------------------------------------------|--------|-----|------|-------|-------|--------|-----|------|-------|-------|
| Land use                                    | Flux type                                                      | Min    | Max | Mean | STDEV | SE    | Min    | Max | Mean | STDEV | SE    |
| Forest                                      |                                                                | 60     | 589 | 210  | 111   | 12.0  | 10     | 446 | 74   | 53    | 5.5   |
| Grassland                                   | SR/ER-CO <sub>2</sub> -C (mg m <sup>-2</sup> h <sup>-1</sup> ) | 136    | 693 | 350  | 123   | 14.1  | 9      | 419 | 131  | 82    | 8.6   |
| Arable                                      |                                                                | 78     | 877 | 431  | 192   | 23.3  | 14     | 238 | 84   | 51    | 6.1   |
| Forest                                      |                                                                | -201   | 176 | -62  | 47    | 5.1   | -214   | 7   | -68  | 48    | 4.9   |
| Grassland                                   | CH <sub>4</sub> -C (µg m <sup>-2</sup> h <sup>-1</sup> )       | -84    | 221 | -9   | 43    | 5.2   | -100   | 28  | -23  | 21    | 2.4   |
| Arable                                      |                                                                | -133   | 157 | 8    | 74    | 12.3  | -43    | 11  | -17  | 10    | 1.4   |
| Forest                                      |                                                                | -13    | 117 | 14   | 24    | 2.9   | -17    | 78  | 5    | 11    | 1.3   |
| Grassland                                   | N <sub>2</sub> O-N (µg m <sup>-2</sup> h <sup>-1</sup> )       | -17    | 281 | 32   | 57    | 7.0   | -18    | 154 | 12   | 30    | 3.7   |
| Arable                                      |                                                                | 13     | 282 | 84   | 65    | 8.4   | -15    | 54  | 12   | 12    | 1.6   |
| <b>Predicted landscape fluxes (RS data)</b> |                                                                |        |     |      |       |       |        |     |      |       |       |
| Forest                                      |                                                                | 37     | 327 | 171  | 51    | 0.03  | 38     | 288 | 74   | 26    | 0.01  |
| Grassland                                   | SR/ER-CO <sub>2</sub> -C (mg m <sup>-2</sup> h <sup>-1</sup> ) | 59     | 484 | 294  | 70    | 0.10  | 39     | 477 | 186  | 89    | 0.13  |
| Arable                                      |                                                                | 35     | 668 | 324  | 111   | 0.08  | 28     | 559 | 102  | 86    | 0.06  |
| Forest                                      |                                                                | -147   | 65  | -70  | 21    | 0.01  | -148   | 65  | -72  | 25    | 0.01  |
| Grassland                                   | CH <sub>4</sub> -C (µg m <sup>-2</sup> h <sup>-1</sup> )       | -60    | 50  | -15  | 17    | 0.02  | -64    | 32  | -18  | 11    | 0.02  |
| Arable                                      |                                                                | -60    | 89  | -5   | 23    | 0.02  | -60    | 75  | -16  | 11    | 0.01  |
| Forest                                      |                                                                | -8     | 38  | 7    | 5     | 0.003 | -6     | 27  | 4    | 4     | 0.002 |
| Grassland                                   | N <sub>2</sub> O-N (µg m <sup>-2</sup> h <sup>-1</sup> )       | -8     | 144 | 26   | 34    | 0.05  | -9     | 69  | 12   | 8     | 0.01  |
| Arable                                      |                                                                | 0      | 190 | 60   | 33    | 0.02  | -1     | 183 | 18   | 17    | 0.01  |
| <b>Predicted landscape fluxes (SP data)</b> |                                                                |        |     |      |       |       |        |     |      |       |       |
| Forest                                      |                                                                | 55     | 343 | 194  | 34    | 0.02  | 41     | 214 | 70   | 14    | 0.01  |
| Grassland                                   | SR/ER-CO <sub>2</sub> -C (mg m <sup>-2</sup> h <sup>-1</sup> ) | 72     | 470 | 320  | 38    | 0.05  | 52     | 319 | 128  | 44    | 0.06  |
| Arable                                      |                                                                | 36     | 733 | 266  | 90    | 0.06  | 28     | 733 | 124  | 60    | 0.04  |
| Forest                                      |                                                                | -123   | 54  | -51  | 11    | 0.01  | -138   | -29 | -51  | 10    | 0.01  |
| Grassland                                   | CH <sub>4</sub> -C (µg m <sup>-2</sup> h <sup>-1</sup> )       | -65    | 37  | -8   | 8     | 0.01  | -65    | 13  | -10  | 6     | 0.01  |
| Arable                                      |                                                                | -87    | 85  | -7   | 26    | 0.02  | -67    | 85  | -13  | 17    | 0.01  |
| Forest                                      |                                                                | -9     | 49  | 9    | 7     | 0.00  | -9     | 23  | 6    | 4     | 0.00  |
| Grassland                                   | N <sub>2</sub> O-N (µg m <sup>-2</sup> h <sup>-1</sup> )       | -6     | 124 | 20   | 8     | 0.01  | -7     | 54  | 7    | 7     | 0.01  |
| Arable                                      |                                                                | 12     | 157 | 45   | 10    | 0.01  | 0      | 150 | 19   | 9     | 0.01  |
| <b>Predicted landscape fluxes (CD data)</b> |                                                                |        |     |      |       |       |        |     |      |       |       |
| Forest                                      |                                                                | 82     | 325 | 185  | 31    | 0.02  | 42     | 195 | 66   | 14    | 0.01  |
| Grassland                                   | SR/ER-CO <sub>2</sub> -C (mg m <sup>-2</sup> h <sup>-1</sup> ) | 155    | 496 | 322  | 47    | 0.07  | 52     | 349 | 145  | 61    | 0.09  |
| Arable                                      |                                                                | 68     | 694 | 321  | 105   | 0.08  | 29     | 568 | 110  | 59    | 0.04  |
| Forest                                      |                                                                | -125   | 55  | -57  | 18    | 0.01  | -136   | -27 | -59  | 19    | 0.01  |
| Grassland                                   | CH <sub>4</sub> -C (µg m <sup>-2</sup> h <sup>-1</sup> )       | -69    | 36  | -6   | 9     | 0.01  | -69    | 13  | -11  | 6     | 0.01  |
| Arable                                      |                                                                | -72    | 78  | 0    | 24    | 0.02  | -72    | 53  | -17  | 11    | 0.01  |
| Forest                                      |                                                                | -9     | 49  | 9    | 7     | 0.00  | -9     | 23  | 6    | 4     | 0.00  |
| Grassland                                   | N <sub>2</sub> O-N (µg m <sup>-2</sup> h <sup>-1</sup> )       | -9     | 152 | 25   | 31    | 0.05  | -8     | 83  | 6    | 7     | 0.01  |
| Arable                                      |                                                                | 16     | 168 | 58   | 21    | 0.02  | 1      | 128 | 16   | 12    | 0.01  |

542



543 **Table B7:** Description of the sampling locations within the common hotspot patches of all three GHG fluxes.

| Site ID | Land use    | Site description and observed soil properties                                                                     |
|---------|-------------|-------------------------------------------------------------------------------------------------------------------|
| Q10     | Forest      | Riparian forest with alder ( <i>Alnus</i> ) trees, higher soil moisture, nitrate, ammonium and DOC concentrations |
| Q73     | Grassland   | Riparian grassland with higher soil moisture, ammonium and DOC concentrations                                     |
| Q80     | Grassland   | Riparian grassland with Clover ( <i>Trifolium</i> ) and higher soil moisture                                      |
| C23     | Grassland   | Higher soil moisture, nitrate, ammonium and DOC concentrations                                                    |
| C79     | Grassland   | Higher ammonium and DOC concentrations                                                                            |
| C45     | Grassland   | A lot of Clover ( <i>Trifolium</i> )                                                                              |
| C37     | Grassland   | A lot of Clover ( <i>Trifolium</i> )                                                                              |
| E7      | Grassland   | A lot of Clover ( <i>Trifolium</i> )                                                                              |
| C3      | Arable land | Barley crops                                                                                                      |
| C13     | Arable land | Barley crops and the soils had higher nitrate concentrations                                                      |
| Q20     | Arable land | Barley crops                                                                                                      |
| C12     | Arable land | Barley crops and the soils had higher soil moisture                                                               |
| C56     | Arable land | Wheat crops and the soils had higher soil moisture                                                                |
| C97     | Arable land | Wheat crops and the soils had higher nitrate concentrations                                                       |

544



#### 545 **Acknowledgments**

This work was part of the MINCA (MIItigation of Nitrogen pollution at CAatchment scale) research project. The authors gratefully acknowledge the German Research Foundation (DFG) for funding the project (HO6420/1-1, KR5265/1-1). KBB additionally received funds via the Pioneer Center for Research in Sustainable Agricultural Futures (Land-CRAFT), DNRG Grant Number P2. Furthermore, Wangari, E. received doctoral funding from the German Academic Exchange Service (DAAD).

#### 546 **Declaration of competing interest**

The authors declare that they have no conflict of interest.

#### 547 **Author contribution**

Conceptualization: KB, LB, GG, TH, RK, DK, EW. Field measurements and laboratory work: EW, RM, TH. Data analysis: EW, RM, KB. Funding acquisition: KB, RK, TH, DK. Writing-original draft preparation: EW, RM, KB. Writing-final draft: EW, KB, RM, LB, RK, TH, DK, GG.

#### 548 **Data availability**

The data will be made freely available via the Zenodo repository after publishing. However, reviewers can request the data anytime during the review process, and the corresponding author will provide it via email.



## 549 References

- Adjuik, T. A., & Davis, S., C.: Machine learning approach to simulate soil CO<sub>2</sub> fluxes under cropping systems. *Agronomy*, 12, 197, <https://doi.org/10.3390/agronomy12010197>, 2022.
- Arias-Navarro, C., Diaz-Pines, E., Klatt, S., Brandt, P., Rufino, M. C., Butterbach-Bahl, K., & Verchot, L. V.: Spatial variability of soil N<sub>2</sub>O and CO<sub>2</sub> fluxes in different topographic positions in a tropical montane forest in Kenya. *Journal of Geophysical Research: Biogeosciences*, 3 (122), 514–527, <https://doi.org/10.1002/2016JG003667>, 2017.
- Bannari, A., Morin, D., Bonn, F., & Huete, A., R.: A review of vegetation indices. *Remote Sensing Reviews*, 13 (1-2), 95-120, DOI: 10.1080/02757259509532298, 1995.
- Barton L., McLay C. D. A., Schipper L. A., & Smith C. T.: Annual denitrification rates in agricultural and forest soils: a review. *Australian Journal of Soil Research*, 37 (6), 1073 – 1094, <https://doi.org/10.1071/SR99009>, 1999.
- Berrar, D.: Cross-validation. *Encyclopedia of Bioinformatics and Computational Biology*, 1, 542-545, DOI: 10.1016/B978-0-12-809633-8.20349-X, 2018.
- Breiman, L.: Random Forests. *Machine Learning*, 45, 5–32, <http://dx.doi.org/10.1023/A:1010933404324>, 2001.
- Butterbach-Bahl, K., & Dannenmann, M.: Denitrification and associated soil N<sub>2</sub>O emissions due to agricultural activities in a changing climate. *Current Opinion in Environmental Sustainability*, 3, (5), 389-395, DOI 10.1016/j.cosust.2011.08.004, 2011.
- Butterbach-Bahl, K., Baggs, E. M., Dannenmann, M., Kiese, R., & Zechmeister-Boltenstern, S.: Nitrous oxide emissions from soils: How well do we understand the processes and their controls? *Philosophical Transactions of the Royal Society B: Biological Sciences*, 368 (1621), 20130122, <https://doi.org/10.1098/rstb.2013.0122>, 2013.
- Butterbach-Bahl, K., Gettel, G., Kiese, R., Fuchs, K., Werner C., Rahimi, J, Barthel, M., & Merbold, L.: Livestock enclosures in drylands of Sub-Saharan Africa are overlooked hotspots of N<sub>2</sub>O emissions. *Nature Communications*, 11, 4644, <https://doi.org/10.1038/s41467-020-18359-y>, 2022.
- Ciarlo, E., Conti, M., Bartoloni, N.: The effect of moisture on nitrous oxide emissions from soil and the N<sub>2</sub>O/(N<sub>2</sub>O+N<sub>2</sub>) ratio under laboratory conditions. *Biology and Fertility of Soils*, 43, 675–681, <https://doi.org/10.1007/s00374-006-0147-9>, 2007.
- Dutaur, L., & Verchot, L.: A global inventory of the soil CH<sub>4</sub> sink. *Global Biogeochemical Cycles*, 21 (4), GB4013, <https://doi.org/10.1029/2006GB002734>, 2007.



- Dhakal, S., J.C. Minx, F.L. Toth, A. Abdel-Aziz, M.J. Figueroa Meza, K. Hubacek, I.G.C. Jonckheere, Yong-Gun Kim, G.F. Nemet, S. Pachauri, X.C. Tan, T. Wiedmann.: Emissions Trends and Drivers, in: IPCC, 2022: Climate Change 2022: Mitigation of Climate Change. Contribution of Working Group III to the Sixth Assessment Report of the Intergovernmental Panel on Climate Change [P.R. Shukla, J. Skea, R. Slade, A. Al Khouradajie, R. van Diemen, D. McCollum, M. Pathak, S. Some, P. Vyas, R. Fradera, M. Belkacemi, A. Hasija, G. Lisboa, S. Luz, J. Malley, (eds.)]. Cambridge University Press, Cambridge, UK and New York, NY, USA. doi: 10.1017/9781009157926.004, 2022.
- Dorich, C. D., De Rosa, D., Barton, L., Grace, P., Rowlings, D., Migliorati, M. A., et al.: Global Research Alliance N<sub>2</sub>O chamber methodology guidelines: Guidelines for gap-filling missing measurements. *Journal of Environmental Quality*, 49 (5), 1186-1202, doi: 10.1002/jeq2.20138, 2020.
- Gao, B.: NDWI-A Normalized Difference Water Index for Remote Sensing of vegetation liquid water from space. *Remote Sensing of Environment*, 58 (3), 257-266, DOI: 10.1016/S0034-4257(96)00067-3, 1996.
- Gitelson, A., A., & Merzlyak, M., N.: Remote sensing of chlorophyll concentration in higher plant leaves. *Advances in Space Research*, 22 (5), 689-692, [https://doi.org/10.1016/S0273-1177\(97\)01133-2](https://doi.org/10.1016/S0273-1177(97)01133-2), 1998.
- Gradka, R. & Kwinta, A.: A short review of interpolation methods used for terrain modeling. *Geomatics, Land Management and Landscape*, 4, 29–47, <https://doi.org/10.15576/GLL/2018.4.29>, 2018.
- Hagedorn, F., & Bellamy, P.: Hot spots and hot moments for greenhouse gas emissions from soils, in *Soil Carbon in Sensitive European Ecosystems: From Science to Land Management*, edited by: Jandl, R., Rodeghiero, M., and Olsson, M., 13–32, Wiley-Blackwell, Chichester, UK. <https://doi.org/10.1002/9781119970255.ch2>, 2011.
- Hamrani, A., Akbarzadeh, A., Madramootoo, C. A.: Machine learning for predicting greenhouse gas emissions from agricultural soils. *Science of The Total Environment*, 741, 140338, DOI: 10.1016/j.scitotenv.2020.140338, 2020.
- Han, L., Yu, G.-R., Chen, Z., Zhu, X.-J., Zhang, W.-K., Wang, T.-J., et al.: Spatiotemporal pattern of ecosystem respiration in China estimated by integration of machine learning with ecological understanding. *Global Biogeochemical Cycles*, (11), 36, e2022GB007439, <https://doi.org/10.1029/2022GB007439>, 2022.
- Hassan, M. U., Aamer, M., Mahmood, A., Awan, M. I., Barbanti, L., Seleiman, M. F., Bakhsh, G., Alkharabsheh, H. M., Babur, E., Shao, J., et al.: Management Strategies to Mitigate N<sub>2</sub>O Emissions in Agriculture. *Life*, 12, 439. <https://doi.org/10.3390/life12030439>, 2022.
- Hensen, A., Skiba, U., & Famulari, D.: Low cost and state of the art methods to measure nitrous oxide emissions. *Environmental Research Letters*, 8 (10), 025022, <https://doi.org/10.1088/1748-9326/8/2/025022>, 2013.





- IPCC.: Summary for policymakers. In P. R. Shukla, J. Skea, E. Calvo Buendia, V. Masson-Delmotte, H.-O. Portner, D. C. Roberts, et al. (Eds.), *Climate change and land: An IPCC special report on climate change, desertification, land degradation, sustainable land management, food security, and greenhouse gas fluxes in terrestrial ecosystem*, 2019.
- Jian, J., Steele, M. K., Thomas, R. Q., Day, S. D., & Hodges, S. C.: Constraining estimates of global soil respiration by quantifying sources of variability. *Global Change Biology*, 24 (9), 4143–4159, <https://doi.org/10.1111/gcb.14301>, 2018.
- Joshi, D. R., Clay, D. E., Clay, S. A., Moriles-Miller, J., Daigh, A. L., Reicks, G., Westhoff, S.: Quantification and Machine learning based N<sub>2</sub>O-N and CO<sub>2</sub>-C emissions predictions from a decomposing rye cover crop. *Agronomy Journal*, <https://doi.org/10.1002/agj2.21185>, 2022.
- Kaiser, K. E., McGlynn, B. L., & Dore, J. E.: Landscape analysis of soil methane flux across complex terrain. *Biogeosciences*, 15, 3143–3167, <https://doi.org/10.5194/bg-15-3143-2018>, 2018.
- Kuhn, M.: Building Predictive Models in R Using the caret Package. *Journal of Statistical Software*, 28, (5), 1-26, DOI: 10.18637/jss.v028.i05, 2008.
- Le Mer, J., & Roger, P. A.: Production, oxidation, emission and consumption of methane by soils: A review. *European Journal of Soil Biology*, 1(37), 25–50, [https://doi.org/10.1016/S1164-5563\(01\)01067-6](https://doi.org/10.1016/S1164-5563(01)01067-6), 2001.
- Levy, P., Clement, R., Cowan, N., Keane, B., Myrgeiotis, V., van Oijen, M., et al.: Challenges in scaling up greenhouse gas fluxes: Experience from the UK greenhouse gas emissions and feedbacks program. *Journal of Geophysical Research: Biogeosciences*, 127, e2021JG006743, <https://doi.org/10.1029/2021JG006743>, 2022.
- Malakhov, D. V., & Tsyhuyeva, Y. T.: Calculation of the biophysical parameters of vegetation in an arid area of south-eastern Kazakhstan using the normalized difference moisture index (NDMI). *Cent. Asian J. Environ. Sci. Technol. Innov.*, 1 (4), 189-198, DOI: 10.22034/CAJESTI.2020.04.01, 2020.
- Malique, F., Ke, P., Boettcher, J., Dannenmann, M., & Butterbach-Bahl, K.: Plant and soil effects on denitrification potential in agricultural soils. *Plant Soil*, 439 (1–2), 459–474, <https://doi.org/10.1007/s11104-019-04038-5>, 2019.
- Mason, C. W., Stoof, C. R., Richards, B. R., Das, S., & Goodale, C. L.: Hotspots of Nitrous Oxide Emission in Fertilized and Unfertilized Perennial Grasses. *Soil Science Society of American Journal*, 81, (3), 450-458, DOI: 10.2136/sssaj2016.08.0249, 2017.
- McDaniel, M. D., Simpson, R. G., Malone, B. P., McBratney, A. B., Minasny, B., & Adams, M. A.: Quantifying and predicting spatio-temporal variability of soil CH<sub>4</sub> and N<sub>2</sub>O fluxes from a seemingly homogeneous Australian agricultural field. *Agriculture, Ecosystems and Environment*, 240, 182-193, <http://dx.doi.org/10.1016/j.agee.2017.02.017>, 2017.



- Molodovskaya, M., Warland, J., Richards, B. K., Öberg, G., & Steenhuis, T. S.: Nitrous oxide from heterogeneous agricultural landscapes: Source contribution analysis by eddy covariance and chambers. *Soil Science Society of American Journal*, 75, (5), 1829-1838, <https://doi.org/10.2136/sssaj2010.0415>, 2011.
- Oertel, C., Matschullat, J., Zurba, K., Zimmermann, F., & Erasmi, S.: Greenhouse gas emissions from soils - a review. *Geochemistry*, 763 (3), 327–352, <https://doi.org/10.1016/j.chemer.2016.04.002>, 2016.
- Philibert, A., Loyce, C., & Makowski, D.: Prediction of N<sub>2</sub>O emission from local information with Random Forest. *Environmental Pollution*, 177, 156-63, doi: 10.1016/j.envpol.2013.02.019, 2013.
- Räsänen, A., Manninen, T., Korkiakoski, M., Lohila, A., & Virtanen, T.: Predicting catchment-scale methane fluxes with multi-source remote sensing. *Landscape Ecology*, 36, 1177–1195, <https://doi.org/10.1007/s10980-021-01194-x>, 2021.
- Rosenstock, T. S., Mariana, C. R., Chirinda, N., van Bussel, L., Reidsma, P., & Butterbach-Bahl, K.: Scaling point and plot measurements of greenhouse gas fluxes, balances, and intensities to whole farms and landscapes. In: Rosenstock, T. S., Mariana, C. R., Butterbach-Bahl, K. Wollenberg, L., & Richards, M. (Eds). 2016. *Methods for Measuring Greenhouse Gas Balances and Evaluating Mitigation Options in Smallholder Agriculture*. Springer, Switzerland. pp.175-188, 2016.
- Saha, D., Basso, B., & Robertson, G. P.: Machine learning improves predictions of agricultural nitrous oxide (N<sub>2</sub>O) emissions from intensively managed cropping systems. *Environmental Research Letters*, 16, (2), 024004, <https://doi.org/10.1088/1748-9326/abd2f3>, 2021.
- Sahraei, A., Kraft, P., Windhorst, D., & Breuer, L.: High-Resolution, in situ monitoring of stable isotopes of water revealed insight into hydrological response behavior. *Water*, 12 (2), 565, <https://doi.org/10.3390/w12020565>, 2020.
- Sahraei, A., Houska, T., & Breuer, L.: Deep learning for isotope hydrology: The application of long short-term memory to estimate high temporal resolution of the stable isotope concentrations in stream and groundwater. *Frontiers in Water*, 3, 113, <https://doi.org/10.3389/frwa.2021.740044>, 2021.
- Steinkamp, R., Butterbach-Bahl, K., & Papen, H.: Methane oxidation by soils of an N-limited and N-fertilized spruce forest in the Black Forest, Germany. *Soil Biology and Biochemistry*, 33(2), 145–153, [https://doi.org/10.1016/S0038-0717\(00\)00124-3](https://doi.org/10.1016/S0038-0717(00)00124-3), 2000.
- Sundqvist, E., Persson, A., Kljun, N., Vestin, P., Chasmer, L., Hopkinson, C., & Lindroth, A.: Upscaling of methane exchange in a boreal forest using soil chamber measurements and high-resolution LiDAR elevation data. *Agricultural and Forest Meteorology*, 15(214–215), 393–401, <https://doi.org/10.1016/j.agrformet.2015.09.003>, 2015.



- Tian, H., Xu, R., Canadell, J. G., Thompson, R. L., Winiwarter, W., Suntharalingam, P., et al.: A comprehensive quantification of global nitrous oxide sources and sinks. *Nature*, 586(7828), 248–256, <https://doi.org/10.1038/s41586-020-2780-0>, 2020.
- Tubiello, F. N., Salvatore, M., Rossi, S., Ferrara, A., Fitton, N., & Smith, P.: The FAOSTAT database of greenhouse gas emissions from agriculture. *Environmental Research Letters*, 8 (1), [015009], <https://doi.org/10.1088/1748-9326/8/1/015009>, 2013.
- Vainio, E., Peltola, O., Kasurinen, V., Kieloaho, A., Tuittila, E., Pihlatie, M.: Topography-based statistical modelling reveals high spatial variability and seasonal emission patches in forest floor methane flux. *Biogeosciences*, 18 (6), 2003–2025, <https://doi.org/10.5194/bg-18-2003-2021>, 2021.
- van Kessel, C., Pennock, D. & Farrell, R.: Seasonal variations in denitrification and nitrous oxide evolution at the landscape scale. *Soil Sci. Soc. Am. J.* 57, 988–995, doi:10.2136/sssaj1993.03615995005700040018x, 1993.
- Wagner-Riddle, C., Baggs, E. M., Clough, T. J., Fuchs, K., & Petersen, S. O.: Mitigation of nitrous oxide emissions in the context of nitrogen loss reduction from agroecosystems: managing hot spots and hot moments. *Current Opinion in Environmental Sustainability*, (47), 46–53, <https://doi.org/10.1016/j.cosust.2020.08.002>, 2020.
- Wangari, E. G., Mwanake, R. M., Kraus, D., Werner, C., Gettel, G. M., Kiese, R., Breuer, L., Butterbach-Bahl, K., & Houska, T.: Number of Chamber Measurement Locations for Accurate Quantification of Landscape-Scale Greenhouse Gas Fluxes: Importance of Land Use, Seasonality, and Greenhouse Gas Type. *Journal of Geophysical Research: Biogeosciences*, 127 (9), e2022JG006901, <https://doi.org/10.1029/2022JG006901>, 2022.
- Warner, D. L., Guevara, M., Inamdar, S., & Vargas, R.: Upscaling soil-atmosphere CO<sub>2</sub> and CH<sub>4</sub> fluxes across a topographically complex forested landscape. *Agricultural and Forest Meteorology*, 264, 80–91, <https://doi.org/10.1016/j.agrformet.2018.09.020>, 2019.
- Webster, K. L., Creed, F., Beall, F. D., & Bourbonniere, R. A.: Sensitivity of catchment-aggregated estimates of soil carbon dioxide efflux to topography under different climatic conditions. *Journal of geophysical research*, 113, G03040, doi:10.1029/2008JG000707, 2018.
- Zhang, C., Comas, X., & Brodylo, D.: A remote sensing technique to upscale methane emission flux in a subtropical peatland. *Journal of Geophysical Research: Biogeosciences*, 125, e2020JG006002, <https://doi.org/10.1029/2020JG006002>, 2020.



### Plain text summary

Agricultural landscapes act as sinks or sources of the greenhouse gases (GHG) CO<sub>2</sub>, CH<sub>4</sub> or N<sub>2</sub>O. Fluxes of these GHGs between ecosystems and the atmosphere are controlled by various physico-chemical and biological processes. Therefore, fluxes depend on environmental conditions such as moisture, temperature, or soil parameters, which results in large spatial and temporal variations of GHG fluxes. Here we describe an example how this variation may be studied and analysed.
